# Supplementary material for: Satellites in the prokaryote world
Source: PubMed Central journal article supplement (PMC6749651; doi:10.1186/s12862-019-1504-2), 2019-09-18
Supplement: 12862_2019_1504_MOESM4_ESM.pdf [file 12862_2019_1504_MOESM4_ESM.pdf]

**Table S4****Archaea. Longest satellites**

| Species                                                                               | Code | Satellite Start | Satellite Length | Number of repeats | Repeat length | Ni | Score  |
|---------------------------------------------------------------------------------------|------|-----------------|------------------|-------------------|---------------|----|--------|
| NC_018876.1_Methanobrevibacterium_thermautotrophicum_str._Delta_H                     | 74   | 3058409         | 3921             | 23                | 147           | 14 | 0.6907 |
| NC_015416.1_Methanohalobium_evestigatum_str._ATCC_35061<br>Methanosaeta concilii GP-6 | 97   | 2497766         | 3826             | 12                | 255           | 9  | 0.6354 |
| NZ_CP009515.1_Methanosarcina_lacustris_Z-7289                                         | 84   | 506749          | 3278             | 53                | 39            | 46 | 0.888  |
| NC_007796.1_Methanospirillum_hungatei_JF-1                                            | 91   | 1464547         | 2875             | 55                | 42            | 42 | 0.6057 |
| NZ_CP009506.1_Methanosarcina_siciliae_T4/M                                            | 86   | 2150348         | 2431             | 11                | 126           | 7  | 0.6792 |
| NZ_CP009516.1_Methanosarcina_horonobensis_HB-1                                        | 83   | 4033713         | 2314             | 8                 | 255           | 5  | 0.6639 |
| NZ_CP009506.1_Methanosarcina_siciliae_T4/M                                            | 86   | 1980464         | 2125             | 14                | 108           | 10 | 0.5935 |
| NZ_CP009515.1_Methanosarcina_lacustris_Z-7289                                         | 84   | 2396966         | 2017             | 8                 | 252           | 8  | 0.8863 |
| NZ_CP009520.1_Methanosarcina_vacuolata_Z-761                                          | 88   | 3931052         | 1960             | 16                | 108           | 14 | 0.8677 |
| NZ_CP009520.1_Methanosarcina_vacuolata_Z-761                                          | 88   | 3373643         | 1954             | 18                | 93            | 14 | 0.7334 |
| NZ_CP009528.1_Methanosarcina_barkeri_MS                                               | 82   | 2243257         | 1855             | 14                | 123           | 10 | 0.7445 |
| NC_015574.1_Methanobacterium_paludis_SWAN1                                            | 47   | 1056639         | 1849             | 20                | 69            | 12 | 0.6498 |
| NC_003552.1_Methanosarcina_acetivorans_str._C2A                                       | 80   | 3137895         | 1843             | 15                | 123           | 14 | 0.7496 |
| NC_003552.1_Methanosarcina_acetivorans_str._C2A                                       | 80   | 2347432         | 1816             | 7                 | 255           | 5  | 0.6062 |
| NZ_CP009501.1_Methanosarcina_thermophila_TM-1                                         | 87   | 1491871         | 1804             | 8                 | 255           | 5  | 0.7089 |
| NZ_CP009516.1_Methanosarcina_horonobensis_HB-1                                        | 83   | 4667608         | 1798             | 7                 | 258           | 5  | 0.5873 |
| NC_015416.1_Methanohalobium_evestigatum_str._ATCC_35061<br>Methanosaeta concilii GP-6 | 97   | 2581430         | 1639             | 12                | 126           | 11 | 0.7916 |
| NZ_CP009528.1_Methanosarcina_barkeri_MS                                               | 82   | 2957391         | 1600             | 13                | 123           | 10 | 0.7408 |
| NC_003552.1_Methanosarcina_acetivorans_str._C2A                                       | 80   | 4063362         | 1585             | 11                | 144           | 11 | 0.8648 |
| NZ_CP009520.1_Methanosarcina_vacuolata_Z-761                                          | 88   | 912557          | 1579             | 6                 | 264           | 5  | 0.9333 |
| NC_017527.1_Methanosaeta_harundinacea_6Ac                                             | 78   | 1496150         | 1564             | 10                | 150           | 9  | 0.7904 |
| NC_003552.1_Methanosarcina_acetivorans_str._C2A                                       | 80   | 2350333         | 1561             | 10                | 126           | 6  | 0.4655 |
| NZ_CP009520.1_Methanosarcina_vacuolata_Z-761                                          | 88   | 598900          | 1548             | 6                 | 258           | 5  | 0.9494 |
| NZ_CP009528.1_Methanosarcina_barkeri_MS                                               | 82   | 1451926         | 1516             | 6                 | 246           | 4  | 0.9106 |
| NZ_CP009520.1_Methanosarcina_vacuolata_Z-761                                          | 88   | 2165164         | 1513             | 13                | 108           | 10 | 0.6825 |
| NC_017527.1_Methanosaeta_harundinacea_6Ac                                             | 78   | 2246493         | 1513             | 11                | 126           | 10 | 0.776  |
| NC_007796.1_Methanospirillum_hungatei_JF-1                                            | 91   | 1468566         | 1495             | 6                 | 249           | 4  | 0.8522 |

## Bacteria. Longest satellites

| NCBI code | Species Code | Satellite Start | Satellite Length | Nr repeats | Repeat length | Ni  | Score  |
|-----------|--------------|-----------------|------------------|------------|---------------|-----|--------|
| NC_009613 | 52           | 2274517         | 5662             | 20         | 297           | 14  | 0.9911 |
| NC_004567 | 65           | 1197875         | 4753             | 200        | 18            | 139 | 0.7437 |
| NC_004113 | 113          | 1066146         | 3898             | 28         | 138           | 22  | 0.7964 |
| NC_002967 | 116          | 367152          | 3762             | 58         | 66            | 55  | 0.2611 |
| NC_006841 | 120          | 1309867         | 3565             | 14         | 255           | 9   | 0.8117 |
| NC_004116 | 103          | 448190          | 3319             | 14         | 237           | 14  | 1      |
| NC_015663 | 61           | 3319081         | 3043             | 147        | 18            | 121 | 0.7717 |
| NC_009613 | 52           | 888739          | 2920             | 12         | 243           | 11  | 0.9733 |
| NC_002516 | 85           | 5187169         | 2905             | 12         | 243           | 8   | 0.8323 |
| NC_004605 | 122          | 1426926         | 2833             | 10         | 228           | 6   | 0.9739 |
| NC_009009 | 108          | 808979          | 2665             | 56         | 36            | 34  | 0.7142 |
| NC_003902 | 123          | 611083          | 2641             | 46         | 48            | 38  | 0.5476 |
| NC_007005 | 87           | 1808215         | 2545             | 36         | 48            | 25  | 0.5567 |
| NC_005957 | 10           | 3540669         | 2521             | 56         | 45            | 45  | 0.8278 |
| NC_011661 | 43           | 1306108         | 2495             | 14         | 156           | 10  | 0.7726 |
| NC_006055 | 72           | 518523          | 2467             | 10         | 261           | 9   | 0.9879 |
| NC_010175 | 33           | 3822728         | 2377             | 12         | 198           | 9   | 0.7385 |
| NC_010175 | 33           | 4575796         | 2269             | 18         | 126           | 18  | 0.8689 |
| NC_016603 | 1            | 2278104         | 2077             | 5          | 258           | 3   | 0.7588 |
| NC_004342 | 69           | 2941021         | 2014             | 17         | 69            | 11  | 0.6251 |
| NC_007929 | 66           | 120838          | 1899             | 28         | 66            | 27  | 0.2806 |
| NC_010175 | 33           | 324795          | 1882             | 25         | 48            | 17  | 0.9252 |
| NC_004342 | 69           | 3289635         | 1757             | 14         | 69            | 9   | 0.6714 |
| NC_009636 | 99           | 3729038         | 1756             | 8          | 219           | 5   | 0.7204 |
| NC_007005 | 87           | 5621795         | 1755             | 15         | 118           | 11  | 0.9441 |
| NC_014318 | 4            | 341402          | 1723             | 10         | 153           | 9   | 0.3366 |
| NC_013853 | 104          | 1548744         | 1711             | 18         | 54            | 13  | 0.8873 |
| NC_007644 | 74           | 505880          | 1656             | 23         | 72            | 16  | 0.3241 |
| NC_004116 | 103          | 908162          | 1651             | 25         | 66            | 23  | 0.3432 |
| NC_013853 | 104          | 1716731         | 1549             | 27         | 48            | 22  | 0.5148 |
| NC_009009 | 108          | 666850          | 1537             | 6          | 252           | 4   | 0.7756 |
| NC_009613 | 52           | 1325546         | 1516             | 20         | 76            | 15  | 0.4394 |
