# Supplementary material for: Satellites in the prokaryote world
Source: PubMed Central journal article supplement (PMC6749651; doi:10.1186/s12862-019-1504-2), 2019-09-18
Supplement: 12862_2019_1504_MOESM7_ESM.pdf [file 12862_2019_1504_MOESM7_ESM.pdf]

## Table S6a. Archaea satellite families

>Fam\_1\_126\_16 Nr. of seq. 16 Alignment length(with gaps) = 136 Alignment score = 0.626532  
GTAATTGACACtGCaACaAacAatGTTACAGCcACnGTganTGTAGGAantaTCCTTgnGGAGTTGCAGTcAACCCGGaTGGAACAAAgGTATATGTGgCgAAntgnaGn  
nAgcAacAcTGTcTCT

>Fam\_2\_12\_13 Nr. of seq. 13 Alignment length(with gaps) = 13 Alignment score = 0.648258  
AtTATTATTAgT

>Fam\_3\_12\_10 Nr. of seq. 10 Alignment length(with gaps) = 14 Alignment score = 0.625132  
TAAAAntAAAAa

>Fam\_4\_12\_10 Nr. of seq. 10 Alignment length(with gaps) = 12 Alignment score = 0.642593  
TgTTaTTgTTaT

>Fam\_5\_16\_8 Nr. of seq. 8 Alignment length(with gaps) = 16 Alignment score = 0.667411  
aTTanttTaTTatTtt

>Fam\_6\_10\_8 Nr. of seq. 8 Alignment length(with gaps) = 12 Alignment score = 0.679067  
ATAAAATAAt

>Fam\_7\_12\_8 Nr. of seq. 8 Alignment length(with gaps) = 12 Alignment score = 0.777282  
tTTTCaCCcAAC

>Fam\_8\_16\_7 Nr. of seq. 7 Alignment length(with gaps) = 17 Alignment score = 0.700280  
TgAtnAAAAACTAAAC

>Fam\_9\_14\_7 Nr. of seq. 7 Alignment length(with gaps) = 16 Alignment score = 0.602183  
TntgAAAGGAAAAAn

>Fam\_10\_13\_7 Nr. of seq. 7 Alignment length(with gaps) = 15 Alignment score = 0.661376  
TTATTATtTTAtt

>Fam\_11\_14\_7 Nr. of seq. 7 Alignment length(with gaps) = 15 Alignment score = 0.634392  
tTCtTTaaTCnTTA

>Fam\_12\_12\_7 Nr. of seq. 7 Alignment length(with gaps) = 13 Alignment score = 0.636142  
aTTgATAAAAtAA

>Fam\_13\_10\_7 Nr. of seq. 7 Alignment length(with gaps) = 12 Alignment score = 0.666667  
TTAtTTTTTA

>Fam\_14\_10\_7 Nr. of seq. 7 Alignment length(with gaps) = 12 Alignment score = 0.619048  
TatTTTTtTC

>Fam\_15\_246\_6 Nr. of seq. 6 Alignment length(with gaps) = 260 Alignment score = 0.646752  
CCAAAtcCCATTTCCATTTaGTnGGtgtTCCTGTgCTtgTGTCAGTAAATTTAACgtTTAAtGGtacTtTTCCCTGAgGTnGGAGAtGCaGAgAAAtgCAGCAacgGGTTTT  
GtTatnACTgTTATATAnTcTgTTTTTGTaCtGTgTTACTGCCTGCaGCATTngTTACTGTAAGTnTAACaGTATAtnTTCCCTGCTTTtGAATACTTATGagTTGGATTC  
TGgagGaaTGActTTGtTCCaTCT

>Fam\_16\_141\_6 Nr. of seq. 6 Alignment length(with gaps) = 141 Alignment score = 0.668558

AAAcTTCTGAATGCGATtATTncCtGtATCGGCAACATAAACATTgCCcGAAGAATCtACAGCAAtACCanatGGataattAAATTgtCCgTcgCGcTGCCataaGAACC  
CCATtgagTaAggaAttTaCCacTGCTaTC

>Fam\_17\_78\_6 Nr. of seq. 6 Alignment length(with gaps) = 82 Alignment score = 0.664228

aGCACCACCATAcTcatTaGCATGgTTATTgacAAAAGAACAAtCacTTAAAatACCATTAgCACCATcCCAATaAAc

>Fam\_18\_12\_6 Nr. of seq. 6 Alignment length(with gaps) = 14 Alignment score = 0.651587

AAGaAGAAAAAG

>Fam\_19\_13\_6 Nr. of seq. 6 Alignment length(with gaps) = 14 Alignment score = 0.647619

TcTTCTATTTTaA

>Fam\_20\_12\_6 Nr. of seq. 6 Alignment length(with gaps) = 13 Alignment score = 0.671795

CTCTTCnTtCTT

>Fam\_21\_12\_6 Nr. of seq. 6 Alignment length(with gaps) = 12 Alignment score = 0.733333

gTCGTGtTCGtG

>Fam\_22\_11\_6 Nr. of seq. 6 Alignment length(with gaps) = 11 Alignment score = 0.751515

aaAtAtaAaaA

>Fam\_23\_156\_5 Nr. of seq. 5 Alignment length(with gaps) = 158 Alignment score = 0.831646

TCAGTCCAGCAGACCcctCGATGGcGGgTATATCATTAcGGGctatACAtagTCCTTCGGGGcAGGCnAnannGATCTgTGGCTGATcAAGACCGATGAcCAGGGAAACAaG  
CTATGGGAgAGGACgTTTGGCGGaGcAGAAntGATgaGGGCnAt

>Fam\_24\_141\_5 Nr. of seq. 5 Alignment length(with gaps) = 142 Alignment score = 0.677700

CCAGAAGTTCAcnTCGACCGGcgnaTTCaTCACgaaaTGGggcaGTnnnGgctCnGgAgaCGGGCaGTTCaactnnCCcnatGGtaTCGCnGTgGACAgCGCcGGcAAcGT  
CTACGTcancGAcncgnnnAACaaCCgGnT

>Fam\_25\_120\_5 Nr. of seq. 5 Alignment length(with gaps) = 128 Alignment score = 0.693750

tTGTTgTtTATcGtGTTAATtACAGtgACaGtATTGCTGttAacaTTaGTCACATAtgCnTttgnTCctgCnAcTGCaATTCCaGcAGGAtacTctCCAACATtAAttGTG  
cCTatAACa

>Fam\_26\_108\_5 Nr. of seq. 5 Alignment length(with gaps) = 109 Alignment score = 0.735474

TCCATGCCTgTTGtTTATCtGGtAcTTGAgAAAAtGCAGAAcCAAGAGCnntgGcaGCactAgacCTcACATcatgaTctTcATCatTggTcAGTcTAagTAAaTCaT

>Fam\_27\_37\_5 Nr. of seq. 5 Alignment length(with gaps) = 37 Alignment score = 0.756757

CACAgAGGaCACagAGAggAtaTTcACCACgGAGGTt

>Fam\_28\_17\_5 Nr. of seq. 5 Alignment length(with gaps) = 19 Alignment score = 0.673684

AATAAcAAAaTAAAAaG

>Fam\_29\_16\_5 Nr. of seq. 5 Alignment length(with gaps) = 17 Alignment score = 0.603922

TAAcAGatTTAtTcnn

>Fam\_30\_15\_5 Nr. of seq. 5 Alignment length(with gaps) = 16 Alignment score = 0.652083

aGaaGAgAAGaAAgA

>Fam\_31\_15\_5 Nr. of seq. 5 Alignment length(with gaps) = 16 Alignment score = 0.716667

CTAAAtCTTnaAGgAG  
>Fam\_32\_12\_5 Nr. of seq. 5 Alignment length(with gaps) = 15 Alignment score = 0.702222  
GTTGAATCaTCt  
>Fam\_33\_14\_5 Nr. of seq. 5 Alignment length(with gaps) = 15 Alignment score = 0.666667  
gAAAAAGAgAaAAAt  
>Fam\_34\_14\_5 Nr. of seq. 5 Alignment length(with gaps) = 15 Alignment score = 0.624444  
CTTAatnAAGtTaC  
>Fam\_35\_15\_5 Nr. of seq. 5 Alignment length(with gaps) = 15 Alignment score = 0.773333  
tTAAAAaACGATAna  
>Fam\_36\_13\_5 Nr. of seq. 5 Alignment length(with gaps) = 14 Alignment score = 0.633333  
AtTctTCtTnCTA  
>Fam\_37\_14\_5 Nr. of seq. 5 Alignment length(with gaps) = 14 Alignment score = 0.885714  
ACTcGGGTGAcGGa  
>Fam\_38\_14\_5 Nr. of seq. 5 Alignment length(with gaps) = 14 Alignment score = 0.885714  
CAACGGTTTcGggT  
>Fam\_39\_13\_5 Nr. of seq. 5 Alignment length(with gaps) = 13 Alignment score = 0.610256  
TTcTaACttcTan  
>Fam\_40\_12\_5 Nr. of seq. 5 Alignment length(with gaps) = 13 Alignment score = 0.648718  
tTCAgtTAATAn  
>Fam\_41\_11\_5 Nr. of seq. 5 Alignment length(with gaps) = 12 Alignment score = 0.644444  
TTctTttnTaa  
>Fam\_42\_12\_5 Nr. of seq. 5 Alignment length(with gaps) = 12 Alignment score = 0.672222  
nAgtTTcAGATt  
>Fam\_43\_10\_5 Nr. of seq. 5 Alignment length(with gaps) = 11 Alignment score = 0.630303  
tTaanTatTt  
>Fam\_44\_255\_4 Nr. of seq. 4 Alignment length(with gaps) = 260 Alignment score = 0.755769

CCTGTgCTCTGGtCAGTAAAACTAACaGTAAGAGGcGctTTTCCTGAAGtngGaGAtGCAGAgAAncTGGnaACAGGagcATcTaaAaCGTTTGAgACAGcAATATAgCcG  
GaTTTTGTcAAtGcatTACTgCCgTTTgCATtaCTTgCtGTCAATGTAAACAGAAAtatagTCCTGatTTatTGTatgTgTgTACaGGATTctTtTCTGTTGAAnTAcTtCCa  
tCTCCaAAAgtCCATtTCcaTgaagTTGGngAt

>Fam\_45\_123\_4 Nr. of seq. 4 Alignment length(with gaps) = 124 Alignment score = 0.768817

AAtAcaTtGCaACgGCGAGtgaTGACAAAtACAgCACGtTTATGGaAtgcAtCTACAGGTAAAcAAATtttTGTtCTGAACCATgatggTtcGgTaaAtAaTgtTgTaTTCA  
GtCCTGATGGAA

>Fam\_46\_102\_4 Nr. of seq. 4 Alignment length(with gaps) = 103 Alignment score = 0.779935

ttTTTCATAGCATTCcAaTGCCTCaTCATATcTCccAAgTtCtTcaAGGAcTAcTCCTTTgTTGTTCCATGcTTCTaCaagTTtTGGaTtTATTTgTAgTGC

>Fam\_47\_69\_4 Nr. of seq. 4 Alignment length(with gaps) = 70 Alignment score = 0.722619

tAAGATTTTTcAacTcTgagATTTCaGGaGGcAgcGAAgTCAaTtGATTncaAGAtAtgTtaAGTggAG

>Fam\_48\_45\_4 Nr. of seq. 4 Alignment length(with gaps) = 47 Alignment score = 0.725768  
gGCGACGGgCCGaAGGaCCGGAGtTtGAGCaCCGcAGGTGcGant

>Fam\_49\_27\_4 Nr. of seq. 4 Alignment length(with gaps) = 30 Alignment score = 0.642593  
AAGCatTTtTtgAAAAGGgTTGCGGgc

>Fam\_50\_18\_4 Nr. of seq. 4 Alignment length(with gaps) = 20 Alignment score = 0.627778  
cTAAaAAAcAAAAAcaG

>Fam\_51\_20\_4 Nr. of seq. 4 Alignment length(with gaps) = 20 Alignment score = 0.613889  
atACaaAAnAAGaaaaAAAT

>Fam\_52\_16\_4 Nr. of seq. 4 Alignment length(with gaps) = 18 Alignment score = 0.643519  
tTTAatAAATATAanT

>Fam\_53\_16\_4 Nr. of seq. 4 Alignment length(with gaps) = 18 Alignment score = 0.646605  
aTaATTgCTtTTTAAc

>Fam\_54\_18\_4 Nr. of seq. 4 Alignment length(with gaps) = 18 Alignment score = 0.654321  
CGgcGTcTCcGTggcCgT

>Fam\_55\_16\_4 Nr. of seq. 4 Alignment length(with gaps) = 17 Alignment score = 0.699346  
aAAAATAAAAATnCTa

>Fam\_56\_16\_4 Nr. of seq. 4 Alignment length(with gaps) = 17 Alignment score = 0.655229  
tGAtAAATGAAatgaTg

>Fam\_57\_15\_4 Nr. of seq. 4 Alignment length(with gaps) = 17 Alignment score = 0.684641  
ctAGAAtTAAAGAAA

>Fam\_58\_16\_4 Nr. of seq. 4 Alignment length(with gaps) = 17 Alignment score = 0.673203  
gATTCAATTTcATaan

>Fam\_59\_15\_4 Nr. of seq. 4 Alignment length(with gaps) = 17 Alignment score = 0.660131  
AAAAtAAcTGGgACA

>Fam\_60\_17\_4 Nr. of seq. 4 Alignment length(with gaps) = 17 Alignment score = 0.653595  
cCTtTctcTTcTAtcTt

>Fam\_61\_14\_4 Nr. of seq. 4 Alignment length(with gaps) = 16 Alignment score = 0.630208  
TGAaatTTaAtTTA

>Fam\_62\_14\_4 Nr. of seq. 4 Alignment length(with gaps) = 16 Alignment score = 0.671875  
GTtgTTAAAAAaCa

>Fam\_63\_14\_4 Nr. of seq. 4 Alignment length(with gaps) = 15 Alignment score = 0.622222  
cATATaATcTCAac

>Fam\_64\_14\_4 Nr. of seq. 4 Alignment length(with gaps) = 15 Alignment score = 0.609259  
AaAtACTAAaTAat

>Fam\_65\_14\_4 Nr. of seq. 4 Alignment length(with gaps) = 15 Alignment score = 0.659259  
ATCTcATtTTAAat

>Fam\_66\_14\_4 Nr. of seq. 4 Alignment length(with gaps) = 15 Alignment score = 0.640741  
GAAACaGatAAgAG

>Fam\_67\_14\_4 Nr. of seq. 4 Alignment length(with gaps) = 15 Alignment score = 0.707407  
AGCtAAAAaCagAT

>Fam\_68\_14\_4 Nr. of seq. 4 Alignment length(with gaps) = 15 Alignment score = 0.751852  
CTTTTTcCTTTctT

>Fam\_69\_14\_4 Nr. of seq. 4 Alignment length(with gaps) = 15 Alignment score = 0.751852  
TACaATTTTTaCAt

>Fam\_70\_15\_4 Nr. of seq. 4 Alignment length(with gaps) = 15 Alignment score = 0.603704  
ATCaGttAAtaaAGg

>Fam\_71\_15\_4 Nr. of seq. 4 Alignment length(with gaps) = 15 Alignment score = 0.681481  
CCTGAATCtattaAa

>Fam\_72\_15\_4 Nr. of seq. 4 Alignment length(with gaps) = 15 Alignment score = 0.777778  
AGAAGaACCaGTaGa

>Fam\_73\_13\_4 Nr. of seq. 4 Alignment length(with gaps) = 14 Alignment score = 0.656746  
gAaATAgAAAAnTG

>Fam\_74\_14\_4 Nr. of seq. 4 Alignment length(with gaps) = 14 Alignment score = 0.650794  
tGaAgGTAAaTata

>Fam\_75\_13\_4 Nr. of seq. 4 Alignment length(with gaps) = 14 Alignment score = 0.648810  
GaAGaAaCTAAAn

>Fam\_76\_14\_4 Nr. of seq. 4 Alignment length(with gaps) = 14 Alignment score = 0.654762  
CAGAaatCcTTAtT

>Fam\_77\_13\_4 Nr. of seq. 4 Alignment length(with gaps) = 14 Alignment score = 0.619048  
TTTTgAgTtTcgA

>Fam\_78\_11\_4 Nr. of seq. 4 Alignment length(with gaps) = 13 Alignment score = 0.653846  
TTACTTtTTnT

>Fam\_79\_13\_4 Nr. of seq. 4 Alignment length(with gaps) = 13 Alignment score = 0.670940  
tATCtGttCATTc

>Fam\_80\_12\_4 Nr. of seq. 4 Alignment length(with gaps) = 13 Alignment score = 0.685897  
AAAtCAaTCAaa

>Fam\_81\_11\_4 Nr. of seq. 4 Alignment length(with gaps) = 13 Alignment score = 0.666667  
aATcAAAATCA

>Fam\_82\_13\_4 Nr. of seq. 4 Alignment length(with gaps) = 13 Alignment score = 0.779915  
gAATTcAGGTtAa

>Fam\_83\_13\_4 Nr. of seq. 4 Alignment length(with gaps) = 13 Alignment score = 0.858974  
TATCaATCAGTtt

>Fam\_84\_13\_4 Nr. of seq. 4 Alignment length(with gaps) = 13 Alignment score = 0.698718  
AgCAAGtTActCa

>Fam\_85\_12\_4 Nr. of seq. 4 Alignment length(with gaps) = 13 Alignment score = 0.711538  
AAaTAAATatcTA

>Fam\_86\_13\_4 Nr. of seq. 4 Alignment length(with gaps) = 13 Alignment score = 0.698718  
AAACTAAaagCTc  
>Fam\_87\_11\_4 Nr. of seq. 4 Alignment length(with gaps) = 12 Alignment score = 0.671296  
aTTATAtTaTA  
>Fam\_88\_12\_4 Nr. of seq. 4 Alignment length(with gaps) = 12 Alignment score = 0.648148  
TTaaTaGTTtAG  
>Fam\_89\_12\_4 Nr. of seq. 4 Alignment length(with gaps) = 12 Alignment score = 0.692130  
TTTctttaTTcA  
>Fam\_90\_12\_4 Nr. of seq. 4 Alignment length(with gaps) = 12 Alignment score = 0.685185  
GGtTCagGcTCT  
>Fam\_91\_12\_4 Nr. of seq. 4 Alignment length(with gaps) = 12 Alignment score = 0.685185  
TTgCtattTGAA  
>Fam\_92\_10\_4 Nr. of seq. 4 Alignment length(with gaps) = 11 Alignment score = 0.638889  
TAAAaAgGat  
>Fam\_93\_11\_4 Nr. of seq. 4 Alignment length(with gaps) = 11 Alignment score = 0.717172  
ATTGaAAAttA  
>Fam\_94\_11\_4 Nr. of seq. 4 Alignment length(with gaps) = 11 Alignment score = 0.858586  
AtATTATGAGa  
>Fam\_95\_258\_3 Nr. of seq. 3 Alignment length(with gaps) = 264 Alignment score = 0.640152

TAcACngTaAaaCTnACAGCAACcAATGCnGCAGGcAGtAAtACgntAACAAAATcaAATAcATaAcAgTnACAGgaACanctgCACAAacnCCgGTTGCagnaTTTTcG  
GcaTctCCnActTCaGGAAAtgCaCCAttgAntGTnAcnTTTACTGAcAgcAGTACaGGntCtCCAACagCnTGGAacTGGAaTTTcGGAGAcGGnACanctTCAaCagtc  
CAGAatCCaAnaCACACATATTcAaCaGCAGGAAcT

>Fam\_96\_137\_3 Nr. of seq. 3 Alignment length(with gaps) = 142 Alignment score = 0.667449

AATCTTGAAAcTgCtaTCngTcTTTAcgGnGAtGCCAGgAAATaTTCCCaAAAacAAGcgtAgaTTACGCTcgTGCgTTGAtgAAcGAGGGTaaTGCAAGAcAAacACTTG  
CaGaaATGGGtgTTGAnAGtAgggaA

>Fam\_97\_126\_3 Nr. of seq. 3 Alignment length(with gaps) = 132 Alignment score = 0.647306

TCTGTAATTGAcACAgCTACAAACActGTTACAGcCAcTGTnaaTGTAGGAgActnaTCCTantGaaGTTGCAGTCAGtCctgAcGGAAAAAaGTnTATGTgACaAAnnC  
AatAGcaAcaATaTt

>Fam\_98\_120\_3 Nr. of seq. 3 Alignment length(with gaps) = 121 Alignment score = 0.666667

AAGAAGCagTgaAAAagTATAACCAgtCaCTggAAATtaaaGAAGAncTtGGagAcAAaagcGGAATTgCAnnAaCacTgCACCAgctTTGGAAngATTtATtAtcaTCAGG  
GcAAtTAcG

>Fam\_99\_120\_3 Nr. of seq. 3 Alignment length(with gaps) = 120 Alignment score = 0.679630

TAagtCCATTTgAGgGTTCCGTCAGggTTcAgtGCaTAtAGtTTnTTgTCannGCTTCcGATgTAGATGGTtCCGTCngctCCnATTGctGgtGAAcTgtagATctnattT  
CCgGTGGTg

- >Fam\_100\_102\_3 Nr. of seq. 3 Alignment length(with gaps) = 102 Alignment score = 0.738562  
TTTACTGTTCTTCTGctTcTtCnaGnCGcCCCATtTcTtnaAGGAGAtTtCCGTAAAtTgnAGTgTgtattnACATgTTTTtGGgTcTgCtTCCAGaGCAAGc
- >Fam\_101\_93\_3 Nr. of seq. 3 Alignment length(with gaps) = 93 Alignment score = 0.930705  
TTTCCAAGTGCCTCTGCCGACTnCTCCGCACATATGAATCTTcATCTTTGAGTGCGTTGATTaACGGCTGCACTGCTgTATCCGAtTTaATA
- >Fam\_102\_51\_3 Nr. of seq. 3 Alignment length(with gaps) = 54 Alignment score = 0.602881  
TTCGcGtttTCTCctGCTCCgGCCCTTCGgcCcgTCGcCagTCgAAaAcgC
- >Fam\_103\_42\_3 Nr. of seq. 3 Alignment length(with gaps) = 48 Alignment score = 0.800926  
CCTCTTCGGTAGGTTcAGGAGTCATCGTAGgCTCtGGAGTGA
- >Fam\_104\_23\_3 Nr. of seq. 3 Alignment length(with gaps) = 25 Alignment score = 0.622222  
GAAAAGTaAAGAAgAnAcAAAA
- >Fam\_105\_21\_3 Nr. of seq. 3 Alignment length(with gaps) = 24 Alignment score = 0.625000  
TnTtTTTTTAAAtTaTAAGTTAA
- >Fam\_106\_19\_3 Nr. of seq. 3 Alignment length(with gaps) = 22 Alignment score = 0.601010  
atTattTATTTtatnTtTt
- >Fam\_107\_18\_3 Nr. of seq. 3 Alignment length(with gaps) = 21 Alignment score = 0.629630  
aAAGAAaTAACTTcAAAAAt
- >Fam\_108\_19\_3 Nr. of seq. 3 Alignment length(with gaps) = 21 Alignment score = 0.613757  
TTnGtTtTCTTAtTTCTn
- >Fam\_109\_17\_3 Nr. of seq. 3 Alignment length(with gaps) = 20 Alignment score = 0.627778  
ttTTTaAGAATTTATcA
- >Fam\_110\_20\_3 Nr. of seq. 3 Alignment length(with gaps) = 20 Alignment score = 0.644444  
aaGAGATaGaGTaaATAAAA
- >Fam\_111\_19\_3 Nr. of seq. 3 Alignment length(with gaps) = 20 Alignment score = 0.755556  
gAaTCTAAAAAAAcGAAtG
- >Fam\_112\_16\_3 Nr. of seq. 3 Alignment length(with gaps) = 19 Alignment score = 0.631579  
AACTTAcTTTTTTCcC
- >Fam\_113\_17\_3 Nr. of seq. 3 Alignment length(with gaps) = 19 Alignment score = 0.654971  
AAATTAaaaAgAgAGatn
- >Fam\_114\_17\_3 Nr. of seq. 3 Alignment length(with gaps) = 19 Alignment score = 0.649123  
AAAgAAcTAAAAACaC
- >Fam\_115\_18\_3 Nr. of seq. 3 Alignment length(with gaps) = 19 Alignment score = 0.684211  
TaATATTTtGGaCTTAtCt
- >Fam\_116\_19\_3 Nr. of seq. 3 Alignment length(with gaps) = 19 Alignment score = 0.602339  
AgcaagtAATACcTGtTAA
- >Fam\_117\_19\_3 Nr. of seq. 3 Alignment length(with gaps) = 19 Alignment score = 0.789474

TCAATTTtACAnTTTcaTA

>Fam\_118\_18\_3 Nr. of seq. 3 Alignment length(with gaps) = 19 Alignment score = 0.725146  
AGgAtAAAAAGGaAgAA

>Fam\_119\_18\_3 Nr. of seq. 3 Alignment length(with gaps) = 19 Alignment score = 0.678363  
TAATCTcATTGATttCtt

>Fam\_120\_18\_3 Nr. of seq. 3 Alignment length(with gaps) = 19 Alignment score = 0.631579  
TTTTcTTTTaActATtaT

>Fam\_121\_18\_3 Nr. of seq. 3 Alignment length(with gaps) = 19 Alignment score = 0.608187  
AAaATaAATTaGntaTTT

>Fam\_122\_15\_3 Nr. of seq. 3 Alignment length(with gaps) = 18 Alignment score = 0.617284  
CAtCGCtaCCGtCAC

>Fam\_123\_17\_3 Nr. of seq. 3 Alignment length(with gaps) = 18 Alignment score = 0.629630  
cTCAGTATTcTgTaTtc

>Fam\_124\_16\_3 Nr. of seq. 3 Alignment length(with gaps) = 18 Alignment score = 0.691358  
AAAAATGaAGAAaAcG

>Fam\_125\_18\_3 Nr. of seq. 3 Alignment length(with gaps) = 18 Alignment score = 0.641975  
TCCaGTAtttTCTTTnn

>Fam\_126\_17\_3 Nr. of seq. 3 Alignment length(with gaps) = 18 Alignment score = 0.611111  
AaAtTTTaAttTACAaC

>Fam\_127\_17\_3 Nr. of seq. 3 Alignment length(with gaps) = 18 Alignment score = 0.611111  
TATanTTTCAAgaAtAn

>Fam\_128\_17\_3 Nr. of seq. 3 Alignment length(with gaps) = 18 Alignment score = 0.635802  
ATtTTGtTCTnaTctT

>Fam\_129\_18\_3 Nr. of seq. 3 Alignment length(with gaps) = 18 Alignment score = 0.802469  
CTgCAACcGAAGagATGA

>Fam\_130\_15\_3 Nr. of seq. 3 Alignment length(with gaps) = 17 Alignment score = 0.627451  
AaATTAtTTTTATCt

>Fam\_131\_16\_3 Nr. of seq. 3 Alignment length(with gaps) = 17 Alignment score = 0.624183  
AACTTTAAGTaanGag

>Fam\_132\_17\_3 Nr. of seq. 3 Alignment length(with gaps) = 17 Alignment score = 0.647059  
AAnaTGATCTTgAaAtn

>Fam\_133\_15\_3 Nr. of seq. 3 Alignment length(with gaps) = 17 Alignment score = 0.679739  
TtACTTaGTTTcAGA

>Fam\_134\_16\_3 Nr. of seq. 3 Alignment length(with gaps) = 17 Alignment score = 0.653595  
ttTtTAAGAAAAnTGAG

>Fam\_135\_15\_3 Nr. of seq. 3 Alignment length(with gaps) = 17 Alignment score = 0.738562  
AAAATCAATtACAnT

>Fam\_136\_15\_3 Nr. of seq. 3 Alignment length(with gaps) = 17 Alignment score = 0.627451



```

nCaTTTTTCATCAGTg
>Fam_137_15_3 Nr. of seq. 3 Alignment length(with gaps) = 17 Alignment score = 0.607843
TTAAACAaAAAttgCa
>Fam_138_15_3 Nr. of seq. 3 Alignment length(with gaps) = 17 Alignment score = 0.660131
AnTGAAAAtAAcACA
>Fam_139_16_3 Nr. of seq. 3 Alignment length(with gaps) = 17 Alignment score = 0.653595
TtAtAnGTTTAtTTTT
>Fam_140_16_3 Nr. of seq. 3 Alignment length(with gaps) = 17 Alignment score = 0.725490
TTcgTTTTTCCTGATa
>Fam_141_17_3 Nr. of seq. 3 Alignment length(with gaps) = 17 Alignment score = 0.614379
TTnTaCTgaGTnTTTAA
>Fam_142_16_3 Nr. of seq. 3 Alignment length(with gaps) = 17 Alignment score = 0.699346
AGnTATTCAGcTatTC
>Fam_143_17_3 Nr. of seq. 3 Alignment length(with gaps) = 17 Alignment score = 0.607843
GnAttATgATTGAAAct
>Fam_144_17_3 Nr. of seq. 3 Alignment length(with gaps) = 17 Alignment score = 0.692810
tgCTTTAAaTcTGTtTc
>Fam_145_13_3 Nr. of seq. 3 Alignment length(with gaps) = 16 Alignment score = 0.645833
tCgAAGAAAAAGA
>Fam_146_15_3 Nr. of seq. 3 Alignment length(with gaps) = 16 Alignment score = 0.604167
tAAnATCCTTtcTct
>Fam_147_14_3 Nr. of seq. 3 Alignment length(with gaps) = 16 Alignment score = 0.625000
ATCTGGTAAtnGTt
>Fam_148_15_3 Nr. of seq. 3 Alignment length(with gaps) = 16 Alignment score = 0.618056
CTGAcATAcAAgGAn
>Fam_149_14_3 Nr. of seq. 3 Alignment length(with gaps) = 16 Alignment score = 0.625000
AGTGTTaaTTTGAt
>Fam_150_14_3 Nr. of seq. 3 Alignment length(with gaps) = 16 Alignment score = 0.659722
AaATTAcTTTCTgT
>Fam_151_15_3 Nr. of seq. 3 Alignment length(with gaps) = 16 Alignment score = 0.618056
CAAaGAntAAGAGaC
>Fam_152_15_3 Nr. of seq. 3 Alignment length(with gaps) = 16 Alignment score = 0.673611
cTATTTTTnTtACTT
>Fam_153_15_3 Nr. of seq. 3 Alignment length(with gaps) = 16 Alignment score = 0.638889
ATTcAtAGaTTGatA
>Fam_154_15_3 Nr. of seq. 3 Alignment length(with gaps) = 16 Alignment score = 0.618056
TTTTaTTtTataCTa
>Fam_155_15_3 Nr. of seq. 3 Alignment length(with gaps) = 16 Alignment score = 0.673611

```

ACCAgTatTGAAAAa  
 >Fam\_156\_16\_3 Nr. of seq. 3 Alignment length(with gaps) = 16 Alignment score = 0.659722  
 TTttAAAAcAAncCTt  
 >Fam\_157\_15\_3 Nr. of seq. 3 Alignment length(with gaps) = 16 Alignment score = 0.645833  
 TaTTnCtAAcCAGAT  
 >Fam\_158\_16\_3 Nr. of seq. 3 Alignment length(with gaps) = 16 Alignment score = 0.729167  
 TTTatTTCAGgTTTct  
 >Fam\_159\_15\_3 Nr. of seq. 3 Alignment length(with gaps) = 16 Alignment score = 0.673611  
 ATGTtgAaCTaAATT  
 >Fam\_160\_16\_3 Nr. of seq. 3 Alignment length(with gaps) = 16 Alignment score = 0.638889  
 CTTAActangTAAatAA  
 >Fam\_161\_16\_3 Nr. of seq. 3 Alignment length(with gaps) = 16 Alignment score = 0.666667  
 TTTAGTtaATTCCnnt  
 >Fam\_162\_12\_3 Nr. of seq. 3 Alignment length(with gaps) = 15 Alignment score = 0.614815  
 TTTCTTCATtGg  
 >Fam\_163\_15\_3 Nr. of seq. 3 Alignment length(with gaps) = 15 Alignment score = 0.762963  
 CCGCCGCaTCGTcaT  
 >Fam\_164\_13\_3 Nr. of seq. 3 Alignment length(with gaps) = 15 Alignment score = 0.800000  
 TTTTAGAATCCGt  
 >Fam\_165\_12\_3 Nr. of seq. 3 Alignment length(with gaps) = 15 Alignment score = 0.622222  
 TTTTCTtTCCc  
 >Fam\_166\_13\_3 Nr. of seq. 3 Alignment length(with gaps) = 15 Alignment score = 0.644444  
 tttTATTTATTCA  
 >Fam\_167\_14\_3 Nr. of seq. 3 Alignment length(with gaps) = 15 Alignment score = 0.629630  
 AGCTTTAAGatTtn  
 >Fam\_168\_14\_3 Nr. of seq. 3 Alignment length(with gaps) = 15 Alignment score = 0.718518  
 AATAAAtcAACAAAt  
 >Fam\_169\_13\_3 Nr. of seq. 3 Alignment length(with gaps) = 15 Alignment score = 0.659259  
 GGAATcAgTTRACT  
 >Fam\_170\_14\_3 Nr. of seq. 3 Alignment length(with gaps) = 15 Alignment score = 0.629630  
 TTTTcTGtTTGtAn  
 >Fam\_171\_14\_3 Nr. of seq. 3 Alignment length(with gaps) = 15 Alignment score = 0.711111  
 TGAaTTTTTgTTCc  
 >Fam\_172\_14\_3 Nr. of seq. 3 Alignment length(with gaps) = 15 Alignment score = 0.666667  
 TGgaCtCTTAAATn  
 >Fam\_173\_15\_3 Nr. of seq. 3 Alignment length(with gaps) = 15 Alignment score = 0.651852  
 tcnAgntaTTttcat  
 >Fam\_174\_15\_3 Nr. of seq. 3 Alignment length(with gaps) = 15 Alignment score = 0.711111

```

tTTTCgaCtTTTCTt
>Fam_175_14_3 Nr. of seq. 3 Alignment length(with gaps) = 15 Alignment score = 0.711111
TTAGcAaGAATAgG
>Fam_176_15_3 Nr. of seq. 3 Alignment length(with gaps) = 15 Alignment score = 0.829630
tTTGAGAAtTATcTC
>Fam_177_15_3 Nr. of seq. 3 Alignment length(with gaps) = 15 Alignment score = 0.792593
GAagTTTGATtGTGT
>Fam_178_15_3 Nr. of seq. 3 Alignment length(with gaps) = 15 Alignment score = 0.703704
TGAAAAaAAAnTtAGa
>Fam_179_15_3 Nr. of seq. 3 Alignment length(with gaps) = 15 Alignment score = 0.674074
CCTaaAgTnGaAGAA
>Fam_180_15_3 Nr. of seq. 3 Alignment length(with gaps) = 15 Alignment score = 0.659259
GAaGAAGaaGtAgcT
>Fam_181_15_3 Nr. of seq. 3 Alignment length(with gaps) = 15 Alignment score = 0.733333
CnGAtGGaAAcCAGA
>Fam_182_15_3 Nr. of seq. 3 Alignment length(with gaps) = 15 Alignment score = 0.762963
aAATAAaaAAAaTCAG
>Fam_183_11_3 Nr. of seq. 3 Alignment length(with gaps) = 14 Alignment score = 0.626984
GTTTACnGAAT
>Fam_184_13_3 Nr. of seq. 3 Alignment length(with gaps) = 14 Alignment score = 0.730159
TAAGtCTGAAAAAn
>Fam_185_12_3 Nr. of seq. 3 Alignment length(with gaps) = 14 Alignment score = 0.650794
TActTaTTTACT
>Fam_186_12_3 Nr. of seq. 3 Alignment length(with gaps) = 14 Alignment score = 0.738095
TTGaACTCTATT
>Fam_187_14_3 Nr. of seq. 3 Alignment length(with gaps) = 14 Alignment score = 0.682540
TTTAtTnAAATtTt
>Fam_188_14_3 Nr. of seq. 3 Alignment length(with gaps) = 14 Alignment score = 0.714286
AAtAAAAtnGAACT
>Fam_189_13_3 Nr. of seq. 3 Alignment length(with gaps) = 14 Alignment score = 0.690476
atTTTTAcCTGAT
>Fam_190_13_3 Nr. of seq. 3 Alignment length(with gaps) = 14 Alignment score = 0.730159
tATAATTgCaCAG
>Fam_191_14_3 Nr. of seq. 3 Alignment length(with gaps) = 14 Alignment score = 0.698413
ATactTTatAAGTT
>Fam_192_14_3 Nr. of seq. 3 Alignment length(with gaps) = 14 Alignment score = 0.650794
TTTcacCAnTaTCT
>Fam_193_14_3 Nr. of seq. 3 Alignment length(with gaps) = 14 Alignment score = 0.746032

```

AACTggcTATTcTA

>Fam\_194\_14\_3 Nr. of seq. 3 Alignment length(with gaps) = 14 Alignment score = 0.650794  
AATCannAATCAAn

>Fam\_195\_14\_3 Nr. of seq. 3 Alignment length(with gaps) = 14 Alignment score = 0.746032  
agaTCAGTAAAtA

>Fam\_196\_14\_3 Nr. of seq. 3 Alignment length(with gaps) = 14 Alignment score = 0.809524  
TCAAAGtAgAGAAg

>Fam\_197\_12\_3 Nr. of seq. 3 Alignment length(with gaps) = 13 Alignment score = 0.632479  
ATTTTTCaatAG

>Fam\_198\_11\_3 Nr. of seq. 3 Alignment length(with gaps) = 13 Alignment score = 0.641026  
AaCaTTTTTTG

>Fam\_199\_12\_3 Nr. of seq. 3 Alignment length(with gaps) = 13 Alignment score = 0.649573  
TTctcTACTGa

>Fam\_200\_11\_3 Nr. of seq. 3 Alignment length(with gaps) = 13 Alignment score = 0.675214  
GtTTATCTTTT

>Fam\_201\_13\_3 Nr. of seq. 3 Alignment length(with gaps) = 13 Alignment score = 0.709402  
TTTTGAATAgnga

>Fam\_202\_12\_3 Nr. of seq. 3 Alignment length(with gaps) = 13 Alignment score = 0.632479  
TCCaAnTaCAAG

>Fam\_203\_13\_3 Nr. of seq. 3 Alignment length(with gaps) = 13 Alignment score = 0.632479  
aTtnACATaTACT

>Fam\_204\_12\_3 Nr. of seq. 3 Alignment length(with gaps) = 13 Alignment score = 0.641026  
ACTTCcGtGgTa

>Fam\_205\_12\_3 Nr. of seq. 3 Alignment length(with gaps) = 13 Alignment score = 0.709402  
tGAAGATtGGTa

>Fam\_206\_12\_3 Nr. of seq. 3 Alignment length(with gaps) = 13 Alignment score = 0.666667  
cACCTTtTTcTC

>Fam\_207\_13\_3 Nr. of seq. 3 Alignment length(with gaps) = 13 Alignment score = 0.623932  
GGAgTggaAAGcA

>Fam\_208\_12\_3 Nr. of seq. 3 Alignment length(with gaps) = 13 Alignment score = 0.675214  
TATTTTCngAa

>Fam\_209\_13\_3 Nr. of seq. 3 Alignment length(with gaps) = 13 Alignment score = 0.794872  
tATTcACAAtTGA

>Fam\_210\_13\_3 Nr. of seq. 3 Alignment length(with gaps) = 13 Alignment score = 0.692308  
TTAtTgAAAAgnG

>Fam\_211\_13\_3 Nr. of seq. 3 Alignment length(with gaps) = 13 Alignment score = 0.658120  
TTTTtATnTgnAC

>Fam\_212\_10\_3 Nr. of seq. 3 Alignment length(with gaps) = 12 Alignment score = 0.657407

ATTTaGGAAT  
 >Fam\_213\_11\_3 Nr. of seq. 3 Alignment length(with gaps) = 12 Alignment score = 0.638889  
 AAtTTtGAAcT  
 >Fam\_214\_12\_3 Nr. of seq. 3 Alignment length(with gaps) = 12 Alignment score = 0.675926  
 GTTTnCatTCaG  
 >Fam\_215\_11\_3 Nr. of seq. 3 Alignment length(with gaps) = 12 Alignment score = 0.611111  
 tTGGCTTTcAn  
 >Fam\_216\_11\_3 Nr. of seq. 3 Alignment length(with gaps) = 12 Alignment score = 0.685185  
 AtTCaGtATCt  
 >Fam\_217\_12\_3 Nr. of seq. 3 Alignment length(with gaps) = 12 Alignment score = 0.712963  
 nAAGGGAtAaTT  
 >Fam\_218\_12\_3 Nr. of seq. 3 Alignment length(with gaps) = 12 Alignment score = 0.712963  
 AaGaTAGATAAn  
 >Fam\_219\_12\_3 Nr. of seq. 3 Alignment length(with gaps) = 12 Alignment score = 0.703704  
 TgTAAAAGAAAnA  
 >Fam\_220\_12\_3 Nr. of seq. 3 Alignment length(with gaps) = 12 Alignment score = 0.722222  
 AgAgGaAGgGGA  
 >Fam\_221\_12\_3 Nr. of seq. 3 Alignment length(with gaps) = 12 Alignment score = 0.703704  
 GTGtCtGtGTCg  
 >Fam\_222\_12\_3 Nr. of seq. 3 Alignment length(with gaps) = 12 Alignment score = 0.703704  
 TGGtTtTGgtTT  
 >Fam\_223\_12\_3 Nr. of seq. 3 Alignment length(with gaps) = 12 Alignment score = 0.703704  
 ctTTaAGtTATT  
 >Fam\_224\_12\_3 Nr. of seq. 3 Alignment length(with gaps) = 12 Alignment score = 0.851852  
 ATTTgATTCTTc  
 >Fam\_225\_10\_3 Nr. of seq. 3 Alignment length(with gaps) = 11 Alignment score = 0.606061  
 TtgtTTGAAA  
 >Fam\_226\_10\_3 Nr. of seq. 3 Alignment length(with gaps) = 11 Alignment score = 0.737374  
 AAGGAAAGat  
 >Fam\_227\_11\_3 Nr. of seq. 3 Alignment length(with gaps) = 11 Alignment score = 0.676768  
 acAATcAaACT  
 >Fam\_228\_10\_3 Nr. of seq. 3 Alignment length(with gaps) = 10 Alignment score = 0.644444  
 TCTTCcctTg  
 >Fam\_229\_261\_2 Nr. of seq. 2 Alignment length(with gaps) = 261 Alignment score = 0.833972

GTTTCGGTATCCGTGCCGTTTGCATTGCTaACcGTCAGTTTgGCTTCATAAGTCCCTCTGGAAGTGTAaaTaTAAGCAAAGCTTGccgCATTAGAGTCcTCGACcCCGTCA  
 CCATTAACATCCCAGCTcaaTcTCGaaGTTGCATTCTcCGAAagGTCGGTaaAGAGaACaGTAAGaGGGTAAaTAaCCGCTGTTTTATTCAaTGTGAAGTTTGCTACGGGA  
 AGAAcAGGAAgTTCTTCTTCCAgCACGGTAATCACAGCA

>Fam\_230\_159\_2 Nr. of seq. 2 Alignment length(with gaps) = 159 Alignment score = 0.781971

TATGACCTTATGATCGGTGaAtcTgaaGGAGTtACATATGGTTATGAGAATACCGGGTCTTCGGacAGCCCGGaGTGGaCTGCGAAaTCTTCcTGGAAATaccCCTgaTaTATG  
GGTtacTgcTgCATcACCAGCTTTgGCCGacCTTGACgGTGATGGcGAC

>Fam\_231\_158\_2 Nr. of seq. 2 Alignment length(with gaps) = 158 Alignment score = 0.618143

TACGGaGGaAaaGGaGAGaATatGcCttacGCgGTTGCaATaGCTCaAAAcGGgGAcATaATaGTgaCaGGcgaCACTaACAGcTTCGGCGCTGGTaAtGATGACgTTTG  
GGTTCTcAGaCTTGATnGcaAaTGGaAAcaTcAAGTGGCAaAAaACT

>Fam\_232\_145\_2 Nr. of seq. 2 Alignment length(with gaps) = 145 Alignment score = 0.786207

AAAAAGCACTCaAAATcgAcGcAAAAACTACTCaAAAAaGACCCCGAAAAcGTagCaTACCAATCaTACGTAGGAAtGACaCTAAACAATTTAGGAAACTTGCTTaaaaAT  
ATGGGGagaATTGAAGAcGCGAAAAaAaAGGTACG

>Fam\_233\_141\_2 Nr. of seq. 2 Alignment length(with gaps) = 141 Alignment score = 0.806147

TATATGTTGCCaGcacCATCAACcGCAATACCagAcGgtcGaTCGAATTGTCTGGcTCGtcGCCATgGCTgCCCATTGTTGTCCAGGTGTTTGTGGcTTTGTTCATACC  
TGAATCCTgTgATTAAagGTGTGCGcTACG

>Fam\_234\_131\_2 Nr. of seq. 2 Alignment length(with gaps) = 131 Alignment score = 0.753181

CCATTTTGCCACAGGAAAGCAtGTGAttCacCagTATCCGTCTTGACTGAcACcACTACCTGCCATTgTCATTGATTCCaCTGGCAcaGCTATatgCTaCatcCgagcG  
TTCCAAGATCAGTCATCaca

>Fam\_235\_126\_2 Nr. of seq. 2 Alignment length(with gaps) = 126 Alignment score = 0.788360

ACCTTGAGGGTCTGATCACCGGAaGCaGATACaGCTcTcaGACCGTCcGGGGTCACcGCCACCGCgCTGACCcAAgCGGAATGaCCTTTCAGcGTCCgCgAgCTCCTCGCCC  
CTcTCCAGGTCCCAc

>Fam\_236\_126\_2 Nr. of seq. 2 Alignment length(with gaps) = 126 Alignment score = 0.817460

AGTGCTTTTTTCGTAAcTCTCCATACTTTCATAGAGTCCTGCGAGATTaTTTAGgGTTGTTGCAACATCTGGaTGTTGcGGcCCcAGaACCTTTTCActtATtTCaAGTGcc  
CgTTGAgAAAGTggG

>Fam\_237\_123\_2 Nr. of seq. 2 Alignment length(with gaps) = 123 Alignment score = 0.691057

TCAATTGCTTTTTcTcagcTCgCCTAGaTGAAATATATgCTaacCCCAAATcTCCAAGATgATTCCTTCTCtgCaTacTTATCaTTCnATTTcTCTtGAAATTTTCAAcGCC  
TGcTcaTAAaAT

>Fam\_238\_110\_2 Nr. of seq. 2 Alignment length(with gaps) = 110 Alignment score = 0.721212

TTCTTCTTTTCTTTGcCCATCCAAATaAGGaACAAgAGCaGAAAGgGCaTaTaaTCTgTGnATAaTCATCTTcAATCcTgGAGGcTGacaTCAAGGGCTTTTTTCatCAC

>Fam\_239\_104\_2 Nr. of seq. 2 Alignment length(with gaps) = 104 Alignment score = 0.637821

AGGGccagCCCCGGTTGTaCCAGGCcagGGCGaAGccCGGaTCGAtCTcCAGGGCCcCGTCGTAgcAcTCGAcCGCTCCTCgTaCCggCCGAGaaGgCgnCG

>Fam\_240\_103\_2 Nr. of seq. 2 Alignment length(with gaps) = 103 Alignment score = 0.621359

GTTaTGATAAGGCTTTAGAAATaGATcCtAaataATgagTaATgCaTGAAaTAAcAAAGGATATgCtTTAgCaGAaCTTGaAAaATAcgaAGAAGCaaTAGAAT

>Fam\_241\_102\_2 Nr. of seq. 2 Alignment length(with gaps) = 102 Alignment score = 0.686275  
ATAAcAAAGGTaaTGCCCTTaaTAAtTTaGGcAaATATaAaGAGgCAATaaaAGCTTATGAtAAAGCCaTAGAGATAaACCCaAAaTATgcCtaTGCaTGGA

>Fam\_242\_79\_2 Nr. of seq. 2 Alignment length(with gaps) = 79 Alignment score = 0.738397  
GTTGCATATGAATTgTTcAaTgTgCCTCgATTatataCCAACCAGTCCACCGACAtAaCaNaaCCNTCAACATTTCCA

>Fam\_243\_57\_2 Nr. of seq. 2 Alignment length(with gaps) = 57 Alignment score = 0.827485  
cGCGGTTCTCACTCACTTCGTTTCGCTCGCGGGTCACacTcGTTCCCCGCTCGcaGcC

>Fam\_244\_54\_2 Nr. of seq. 2 Alignment length(with gaps) = 54 Alignment score = 0.632716  
gAAAAAGAAATACAAGAACAAATAAaAGGAAtgttAAAtcCAgAacCGaAAcTC

>Fam\_245\_45\_2 Nr. of seq. 2 Alignment length(with gaps) = 45 Alignment score = 0.614815  
TCgTCGTCTcGCTGCTcTTCTCCTcTCcTCAGCcTCcTCaTCacTc

>Fam\_246\_39\_2 Nr. of seq. 2 Alignment length(with gaps) = 39 Alignment score = 0.722222  
CCCGAATTGCGcCTCGGGAGTACGCgGTCCTTttcgctg

>Fam\_247\_36\_2 Nr. of seq. 2 Alignment length(with gaps) = 36 Alignment score = 1.000000  
AGCGGAAGTTCTGATACAGGAGATTcAGTCTCAGAT

>Fam\_248\_35\_2 Nr. of seq. 2 Alignment length(with gaps) = 35 Alignment score = 0.809524  
gTaACCACAGAGGCACAGAGGgaCACAGAGAAcGg

>Fam\_249\_33\_2 Nr. of seq. 2 Alignment length(with gaps) = 33 Alignment score = 0.676768  
cCCaAcGCGCCTGcTCGGgCCGCGcCGcCgTCG

>Fam\_250\_33\_2 Nr. of seq. 2 Alignment length(with gaps) = 33 Alignment score = 0.969697  
CCCCAGTCGGTGACNGTATCGACGGTGTGCGCCG

>Fam\_251\_33\_2 Nr. of seq. 2 Alignment length(with gaps) = 33 Alignment score = 0.686869  
AaAGTaTATgcCTAAATAggcGaGGAAATAAAG

>Fam\_252\_33\_2 Nr. of seq. 2 Alignment length(with gaps) = 33 Alignment score = 0.737374  
GTcGAAGgTCGCCCCaTcAAAACcGGCAtaTCC

>Fam\_253\_31\_2 Nr. of seq. 2 Alignment length(with gaps) = 31 Alignment score = 0.612903  
GTTaGAGTTGGGGTgGGTGTgcTgTCTGGa

>Fam\_254\_31\_2 Nr. of seq. 2 Alignment length(with gaps) = 31 Alignment score = 0.913979  
CACCTGAaGGcGCTCACGCTCCGGTTCTTCG

>Fam\_255\_29\_2 Nr. of seq. 2 Alignment length(with gaps) = 29 Alignment score = 0.637931  
TaTCTTTCTaTAttTTCTaTTTCTTTTTg

>Fam\_256\_29\_2 Nr. of seq. 2 Alignment length(with gaps) = 29 Alignment score = 0.770115  
AATAATACCGTTTTTcaCAAATTAaGaaG

>Fam\_257\_28\_2 Nr. of seq. 2 Alignment length(with gaps) = 28 Alignment score = 0.607143  
TTgCTTTCTCTacTCgGCTTCTcTcCtt

>Fam\_258\_28\_2 Nr. of seq. 2 Alignment length(with gaps) = 28 Alignment score = 0.648810  
GacGAAcACGACGGccACAgCCACCAct

>Fam\_259\_28\_2 Nr. of seq. 2 Alignment length(with gaps) = 28 Alignment score = 0.642857  
TTCTTaTTTTTAcTccTTATTaaTTgAC

>Fam\_260\_27\_2 Nr. of seq. 2 Alignment length(with gaps) = 27 Alignment score = 0.709877  
TTTcCaGaTTTTAATTTTAGCGTTTct

>Fam\_261\_27\_2 Nr. of seq. 2 Alignment length(with gaps) = 27 Alignment score = 0.802469  
GCCGCCCATGCCGCCgGGaCCGCCacc

>Fam\_262\_26\_2 Nr. of seq. 2 Alignment length(with gaps) = 26 Alignment score = 0.615385  
CTTCAAtaCaCaTCcTGAGTaTATaT

>Fam\_263\_26\_2 Nr. of seq. 2 Alignment length(with gaps) = 26 Alignment score = 0.621795  
TTCacTTTTAAcTCTTctTgCTTTaAt

>Fam\_264\_26\_2 Nr. of seq. 2 Alignment length(with gaps) = 26 Alignment score = 0.615385  
AGTaAATaAATAAACaTgAaCaAaTA

>Fam\_265\_26\_2 Nr. of seq. 2 Alignment length(with gaps) = 26 Alignment score = 0.602564  
TTagAATTTaaAAAAtTAATgAaaaa

>Fam\_266\_25\_2 Nr. of seq. 2 Alignment length(with gaps) = 25 Alignment score = 0.686667  
TATTTAAAAAaTaAAAAActTAGAa

>Fam\_267\_25\_2 Nr. of seq. 2 Alignment length(with gaps) = 25 Alignment score = 0.606667  
cAccAAAAcaTGAAATagTatAAAA

>Fam\_268\_25\_2 Nr. of seq. 2 Alignment length(with gaps) = 25 Alignment score = 0.620000  
AcACaCCGACGGAAaActGAaAcCGn

>Fam\_269\_25\_2 Nr. of seq. 2 Alignment length(with gaps) = 25 Alignment score = 0.660000  
TaGATTTTGAaAaTTGACTTAaAcG

>Fam\_270\_25\_2 Nr. of seq. 2 Alignment length(with gaps) = 25 Alignment score = 0.633333  
AGaGAAgAaaTTAGAAAAAaaACTt

>Fam\_271\_24\_2 Nr. of seq. 2 Alignment length(with gaps) = 24 Alignment score = 0.666667  
cTCaGTCCGGCGTcgGcTCCGGCTC

>Fam\_272\_24\_2 Nr. of seq. 2 Alignment length(with gaps) = 24 Alignment score = 0.694444  
CAATaTCAAACATTACTgAAcTAA

>Fam\_273\_24\_2 Nr. of seq. 2 Alignment length(with gaps) = 24 Alignment score = 0.618056  
tTTTAaGgTcaATTATaTTAAcCA

>Fam\_274\_24\_2 Nr. of seq. 2 Alignment length(with gaps) = 24 Alignment score = 0.638889  
AGaAATAAGaTAAgaAAATAtTaC

>Fam\_275\_24\_2 Nr. of seq. 2 Alignment length(with gaps) = 24 Alignment score = 0.611111  
gCggACAACgACcCCGAaCCCaCG

>Fam\_276\_24\_2 Nr. of seq. 2 Alignment length(with gaps) = 24 Alignment score = 1.000000  
GAGGACGAGGAAGAGGACAATGAG

>Fam\_277\_24\_2 Nr. of seq. 2 Alignment length(with gaps) = 24 Alignment score = 0.611111  
TACaGATAcagcAaCTGAAGAcAC

>Fam\_278\_23\_2 Nr. of seq. 2 Alignment length(with gaps) = 23 Alignment score = 0.623188  
TaCAaTTTGAAGAGGATacctTA



>Fam\_279\_23\_2 Nr. of seq. 2 Alignment length(with gaps) = 23 Alignment score = 0.637681  
TaaGTTAGTACATTGaAtTATat

>Fam\_280\_23\_2 Nr. of seq. 2 Alignment length(with gaps) = 23 Alignment score = 0.695652  
TGAGAAATGAtTAGAAaATAAAcc

>Fam\_281\_23\_2 Nr. of seq. 2 Alignment length(with gaps) = 23 Alignment score = 0.652174  
GaTTTAGATTtagCTcTAAgTTCA

>Fam\_282\_23\_2 Nr. of seq. 2 Alignment length(with gaps) = 23 Alignment score = 0.601449  
aTTCgTgTTTTAGAAGtTTGTca

>Fam\_283\_23\_2 Nr. of seq. 2 Alignment length(with gaps) = 23 Alignment score = 0.608696  
aTAAAATCAacaAaAGAAaCAAc

>Fam\_284\_23\_2 Nr. of seq. 2 Alignment length(with gaps) = 23 Alignment score = 0.601449  
TAcTCTTACCTaaCtTACCTcTc

>Fam\_285\_23\_2 Nr. of seq. 2 Alignment length(with gaps) = 23 Alignment score = 0.630435  
GTAAGATTtagTaaaAgTTATTGa

>Fam\_286\_23\_2 Nr. of seq. 2 Alignment length(with gaps) = 23 Alignment score = 0.659420  
TTTaaCTTTATATTaaAgcAAGc

>Fam\_287\_23\_2 Nr. of seq. 2 Alignment length(with gaps) = 23 Alignment score = 0.739130  
CCAGATCAgCGCTTCTGcAcaCG

>Fam\_288\_23\_2 Nr. of seq. 2 Alignment length(with gaps) = 23 Alignment score = 0.797101  
AAAAGAAGaAAAAcGAAGAGGGa

>Fam\_289\_23\_2 Nr. of seq. 2 Alignment length(with gaps) = 23 Alignment score = 0.659420  
cAgTAAaCAAACAGaGTTGAGat

>Fam\_290\_23\_2 Nr. of seq. 2 Alignment length(with gaps) = 23 Alignment score = 0.681159  
cTTACaATTTTcCcAaTTTTTAC

>Fam\_291\_23\_2 Nr. of seq. 2 Alignment length(with gaps) = 23 Alignment score = 0.739130  
GAAAAAcAAAAcAGAAGaAaAGGT

>Fam\_292\_23\_2 Nr. of seq. 2 Alignment length(with gaps) = 23 Alignment score = 0.710145  
ATTAAAAATaACcTAATaTcaA

>Fam\_293\_23\_2 Nr. of seq. 2 Alignment length(with gaps) = 23 Alignment score = 0.652174  
TaaGATAaaAATAaaATCAGaAT

>Fam\_294\_22\_2 Nr. of seq. 2 Alignment length(with gaps) = 22 Alignment score = 0.613636  
tCaTTAaAAAAGGAAAtcCAAc

>Fam\_295\_22\_2 Nr. of seq. 2 Alignment length(with gaps) = 22 Alignment score = 0.606061  
GaAATcGaaaTAAAATCaAAAA

>Fam\_296\_22\_2 Nr. of seq. 2 Alignment length(with gaps) = 22 Alignment score = 0.696970  
CTTTAATTgTTcAcTtCTTATT

>Fam\_297\_22\_2 Nr. of seq. 2 Alignment length(with gaps) = 22 Alignment score = 0.674242  
TaATAgATAAATTTACAGaTAAt

>Fam\_298\_22\_2 Nr. of seq. 2 Alignment length(with gaps) = 22 Alignment score = 0.666667  
gTCGtGGaGTGTCTGTGcCGTg

>Fam\_299\_22\_2 Nr. of seq. 2 Alignment length(with gaps) = 22 Alignment score = 0.666667  
aCTTTTcCTTcTATTTTcTTCC

>Fam\_300\_22\_2 Nr. of seq. 2 Alignment length(with gaps) = 22 Alignment score = 0.666667  
aGAATATTGAAAGAGTAtTaaA

>Fam\_301\_22\_2 Nr. of seq. 2 Alignment length(with gaps) = 22 Alignment score = 0.613636  
TAAgTCTCATgTTaaATcTTAa

>Fam\_302\_22\_2 Nr. of seq. 2 Alignment length(with gaps) = 22 Alignment score = 0.643939  
AATTCaAAAAGATcTgAaAaGa

>Fam\_303\_22\_2 Nr. of seq. 2 Alignment length(with gaps) = 22 Alignment score = 0.606061  
TccTTCCAgAAGATTAcTTcgT

>Fam\_304\_22\_2 Nr. of seq. 2 Alignment length(with gaps) = 22 Alignment score = 0.606061  
aaTaCTgaAAAacTTTCTATAAT

>Fam\_305\_22\_2 Nr. of seq. 2 Alignment length(with gaps) = 22 Alignment score = 0.606061  
AAaTCtAAGGaAaaTTTAAGaG

>Fam\_306\_22\_2 Nr. of seq. 2 Alignment length(with gaps) = 22 Alignment score = 0.643939  
TCTTTaAGAAaAcTcATTCTAc

>Fam\_307\_22\_2 Nr. of seq. 2 Alignment length(with gaps) = 22 Alignment score = 0.636364  
TcGTGATGTGGcgGTGagGGgG

>Fam\_308\_22\_2 Nr. of seq. 2 Alignment length(with gaps) = 22 Alignment score = 0.636364  
AAATaaAgaGTaGAATTATaAA

>Fam\_309\_22\_2 Nr. of seq. 2 Alignment length(with gaps) = 22 Alignment score = 0.696970  
TAAAAAcaTATTagATTAATcT

>Fam\_310\_21\_2 Nr. of seq. 2 Alignment length(with gaps) = 21 Alignment score = 0.603175  
GAACCTGAAGtAACCgAGacA

>Fam\_311\_21\_2 Nr. of seq. 2 Alignment length(with gaps) = 21 Alignment score = 0.658730  
AAcCtaAGAAAACCCgAAATTa

>Fam\_312\_21\_2 Nr. of seq. 2 Alignment length(with gaps) = 21 Alignment score = 0.658730  
TCATTTTCTAcAaTTccTGTt

>Fam\_313\_21\_2 Nr. of seq. 2 Alignment length(with gaps) = 21 Alignment score = 0.611111  
ATAAcCTGAAtAGaTTTGcat

>Fam\_314\_21\_2 Nr. of seq. 2 Alignment length(with gaps) = 21 Alignment score = 0.626984  
GGATAAcCTcAAcACTTTaAa

>Fam\_315\_21\_2 Nr. of seq. 2 Alignment length(with gaps) = 21 Alignment score = 0.626984  
taTAATTaAGTTTaaACTaAG

>Fam\_316\_21\_2 Nr. of seq. 2 Alignment length(with gaps) = 21 Alignment score = 0.603175  
ggTaCTGAccTGAGAAAATCc

>Fam\_317\_21\_2 Nr. of seq. 2 Alignment length(with gaps) = 21 Alignment score = 0.698413  
CaTTTCTTTCTaCTTTcTTct

>Fam\_318\_21\_2 Nr. of seq. 2 Alignment length(with gaps) = 21 Alignment score = 0.722222  
aTTTTTACtTATTTTTATTat

>Fam\_319\_21\_2 Nr. of seq. 2 Alignment length(with gaps) = 21 Alignment score = 0.650794  
CTTaaTTATTTCTCAGaTaC

>Fam\_320\_21\_2 Nr. of seq. 2 Alignment length(with gaps) = 21 Alignment score = 0.626984  
aTACTTaCTGcCTTCTagCCt

>Fam\_321\_21\_2 Nr. of seq. 2 Alignment length(with gaps) = 21 Alignment score = 0.650794  
AAaAACAGAcGGAAGcTaAG

>Fam\_322\_21\_2 Nr. of seq. 2 Alignment length(with gaps) = 21 Alignment score = 0.619048  
CGacGACGaCGGCGAACaaaC

>Fam\_323\_21\_2 Nr. of seq. 2 Alignment length(with gaps) = 21 Alignment score = 0.682540  
CGcCcGTcGcGgTCGTCGaGT

>Fam\_324\_21\_2 Nr. of seq. 2 Alignment length(with gaps) = 21 Alignment score = 0.682540  
AACGAcACcGaGaCcGCTGAC

>Fam\_325\_21\_2 Nr. of seq. 2 Alignment length(with gaps) = 21 Alignment score = 0.873016  
TGCTgGAgAAACAGGATCAGA

>Fam\_326\_21\_2 Nr. of seq. 2 Alignment length(with gaps) = 21 Alignment score = 0.682540  
TTTaAATaAaaAATgGTATAC

>Fam\_327\_21\_2 Nr. of seq. 2 Alignment length(with gaps) = 21 Alignment score = 0.634921  
cTCTTCAaCTaCaTCcAAgTC

>Fam\_328\_21\_2 Nr. of seq. 2 Alignment length(with gaps) = 21 Alignment score = 0.682540  
CcGTTAcATTcTCCTCaGGTA

>Fam\_329\_20\_2 Nr. of seq. 2 Alignment length(with gaps) = 20 Alignment score = 0.641667  
TAaTCTTTTTAAATCcagcg

>Fam\_330\_20\_2 Nr. of seq. 2 Alignment length(with gaps) = 20 Alignment score = 0.750000  
AATAAATaTAATcAAAaTAT

>Fam\_331\_20\_2 Nr. of seq. 2 Alignment length(with gaps) = 20 Alignment score = 0.716667  
CCaTGCAATATcAATAATca

>Fam\_332\_20\_2 Nr. of seq. 2 Alignment length(with gaps) = 20 Alignment score = 0.641667  
AcTTaCTGgTTaATTCTTCa

>Fam\_333\_20\_2 Nr. of seq. 2 Alignment length(with gaps) = 20 Alignment score = 0.683333  
aAAAATAAcCaGAATTAGnt

>Fam\_334\_20\_2 Nr. of seq. 2 Alignment length(with gaps) = 20 Alignment score = 0.700000  
ATCaAATTTAAATaCCAgGAG

>Fam\_335\_20\_2 Nr. of seq. 2 Alignment length(with gaps) = 20 Alignment score = 0.608333  
AAAAActGAACaTgATaCGa

>Fam\_336\_20\_2 Nr. of seq. 2 Alignment length(with gaps) = 20 Alignment score = 0.633333  
aaAgTcAAAAAAGaATATG  
>Fam\_337\_20\_2 Nr. of seq. 2 Alignment length(with gaps) = 20 Alignment score = 0.608333  
aaaAATTCATaTATAaAcAg  
>Fam\_338\_20\_2 Nr. of seq. 2 Alignment length(with gaps) = 20 Alignment score = 0.666667  
TAAAtATATaaTTTAatAGT  
>Fam\_339\_20\_2 Nr. of seq. 2 Alignment length(with gaps) = 20 Alignment score = 0.633333  
aAAAAaGAgcTAAGAaGCAA  
>Fam\_340\_20\_2 Nr. of seq. 2 Alignment length(with gaps) = 20 Alignment score = 0.666667  
TTaTaTGGAAGTTaGTGaT  
>Fam\_341\_20\_2 Nr. of seq. 2 Alignment length(with gaps) = 20 Alignment score = 0.666667  
TAAAAATcATGcAACgTATg  
>Fam\_342\_20\_2 Nr. of seq. 2 Alignment length(with gaps) = 20 Alignment score = 0.700000  
TaAAAgTCAGcTaGAATAAA  
>Fam\_343\_20\_2 Nr. of seq. 2 Alignment length(with gaps) = 20 Alignment score = 0.766667  
aTAAAAaAAGGaTAAAAGAA  
>Fam\_344\_20\_2 Nr. of seq. 2 Alignment length(with gaps) = 20 Alignment score = 0.675000  
TACaAaATTcAAGTCAATat  
>Fam\_345\_20\_2 Nr. of seq. 2 Alignment length(with gaps) = 20 Alignment score = 0.666667  
TTTTTAagTTTaTTAacTAA  
>Fam\_346\_20\_2 Nr. of seq. 2 Alignment length(with gaps) = 20 Alignment score = 0.666667  
TTgaTaCTTaTTaTGTATAT  
>Fam\_347\_19\_2 Nr. of seq. 2 Alignment length(with gaps) = 19 Alignment score = 0.657895  
AATAAtgCAAAATAATCtGa  
>Fam\_348\_19\_2 Nr. of seq. 2 Alignment length(with gaps) = 19 Alignment score = 0.649123  
GGATAAaAGaATAtaTTCA  
>Fam\_349\_19\_2 Nr. of seq. 2 Alignment length(with gaps) = 19 Alignment score = 0.640351  
aTCATTTTAcCTTaAtTCT  
>Fam\_350\_19\_2 Nr. of seq. 2 Alignment length(with gaps) = 19 Alignment score = 0.631579  
TTGAAAGaAAgCtCATTgc  
>Fam\_351\_19\_2 Nr. of seq. 2 Alignment length(with gaps) = 19 Alignment score = 0.622807  
TTTcAGATTACAcGaTaAc  
>Fam\_352\_19\_2 Nr. of seq. 2 Alignment length(with gaps) = 19 Alignment score = 0.692982  
aTCtCATTTTTGcAATTCT  
>Fam\_353\_19\_2 Nr. of seq. 2 Alignment length(with gaps) = 19 Alignment score = 0.692982  
TAATTAAAATaAAcCTAaa  
>Fam\_354\_19\_2 Nr. of seq. 2 Alignment length(with gaps) = 19 Alignment score = 0.692982  
TTcAAaAATTAAcTTAAAA

>Fam\_355\_19\_2 Nr. of seq. 2 Alignment length(with gaps) = 19 Alignment score = 0.649123  
AAAGGTaATAATcTaTTTA

>Fam\_356\_19\_2 Nr. of seq. 2 Alignment length(with gaps) = 19 Alignment score = 0.666667  
TCTcTTTCTTaaGCTTatt

>Fam\_357\_19\_2 Nr. of seq. 2 Alignment length(with gaps) = 19 Alignment score = 0.614035  
ATTcAGGagTTAATTacTc

>Fam\_358\_19\_2 Nr. of seq. 2 Alignment length(with gaps) = 19 Alignment score = 0.622807  
gCCCGaCTCGcCTGcTCCc

>Fam\_359\_19\_2 Nr. of seq. 2 Alignment length(with gaps) = 19 Alignment score = 0.614035  
CCcCTCCaaCTaCTCCaCC

>Fam\_360\_19\_2 Nr. of seq. 2 Alignment length(with gaps) = 19 Alignment score = 0.684211  
aTATcAgTaAAATcAAATT

>Fam\_361\_19\_2 Nr. of seq. 2 Alignment length(with gaps) = 19 Alignment score = 0.622807  
gCTGtTGGaGTTaCTTCTa

>Fam\_362\_19\_2 Nr. of seq. 2 Alignment length(with gaps) = 19 Alignment score = 0.692982  
aAGgAaTAGAAATaATAAG

>Fam\_363\_19\_2 Nr. of seq. 2 Alignment length(with gaps) = 19 Alignment score = 0.614035  
TAAGtGCAGcAAcCTGaAc

>Fam\_364\_19\_2 Nr. of seq. 2 Alignment length(with gaps) = 19 Alignment score = 0.649123  
CGAgatTTTCaCaACTTAA

>Fam\_365\_19\_2 Nr. of seq. 2 Alignment length(with gaps) = 19 Alignment score = 0.719298  
TaAGTTaAATAAtATTAAG

>Fam\_366\_19\_2 Nr. of seq. 2 Alignment length(with gaps) = 19 Alignment score = 0.649123  
aTTCaAATaACTCCAgATG

>Fam\_367\_19\_2 Nr. of seq. 2 Alignment length(with gaps) = 19 Alignment score = 0.614035  
acTGAgAaACATTTGaaAAT

>Fam\_368\_19\_2 Nr. of seq. 2 Alignment length(with gaps) = 19 Alignment score = 0.684211  
AAAAATGGGaaAaCAaGAc

>Fam\_369\_19\_2 Nr. of seq. 2 Alignment length(with gaps) = 19 Alignment score = 0.684211  
TcaGAAAaAcAgGAAAATAG

>Fam\_370\_19\_2 Nr. of seq. 2 Alignment length(with gaps) = 19 Alignment score = 0.684211  
GATTAagTAAAatcTTGATT

>Fam\_371\_19\_2 Nr. of seq. 2 Alignment length(with gaps) = 19 Alignment score = 0.614035  
TATTGgcACATTATaTcaT

>Fam\_372\_19\_2 Nr. of seq. 2 Alignment length(with gaps) = 19 Alignment score = 0.684211  
ATTTCaCaAaAcTATTaTAT

>Fam\_373\_19\_2 Nr. of seq. 2 Alignment length(with gaps) = 19 Alignment score = 0.614035  
AGaAAACaCAGaGaaAcGG

>Fam\_374\_19\_2 Nr. of seq. 2 Alignment length(with gaps) = 19 Alignment score = 0.614035  
TgCTcATaTaTTATCCAaG

>Fam\_375\_19\_2 Nr. of seq. 2 Alignment length(with gaps) = 19 Alignment score = 0.789474  
TTTAAACTTTCTaAaGaG

>Fam\_376\_19\_2 Nr. of seq. 2 Alignment length(with gaps) = 19 Alignment score = 0.929825  
AGTAATTTAGCTATCAGTa

>Fam\_377\_19\_2 Nr. of seq. 2 Alignment length(with gaps) = 19 Alignment score = 0.649123  
TTTGcCTTgAcTTTaCaTa

>Fam\_378\_19\_2 Nr. of seq. 2 Alignment length(with gaps) = 19 Alignment score = 0.649123  
TTGacgAAaATCTcTAAAT

>Fam\_379\_18\_2 Nr. of seq. 2 Alignment length(with gaps) = 18 Alignment score = 0.638889  
AACGAGAgCgCCAGcGCc

>Fam\_380\_18\_2 Nr. of seq. 2 Alignment length(with gaps) = 18 Alignment score = 0.638889  
AATTGTaaATTgTGATTc

>Fam\_381\_18\_2 Nr. of seq. 2 Alignment length(with gaps) = 18 Alignment score = 0.731481  
ATTATCCaCTGAAATatc

>Fam\_382\_18\_2 Nr. of seq. 2 Alignment length(with gaps) = 18 Alignment score = 0.685185  
TTCTgTAaTTTAGGGAtg

>Fam\_383\_18\_2 Nr. of seq. 2 Alignment length(with gaps) = 18 Alignment score = 0.638889  
GAACTGTTaaAGCAaAAc

>Fam\_384\_18\_2 Nr. of seq. 2 Alignment length(with gaps) = 18 Alignment score = 0.611111  
aATCCAcAAATaGAAAcTa

>Fam\_385\_18\_2 Nr. of seq. 2 Alignment length(with gaps) = 18 Alignment score = 0.694444  
ATTAAaAGATCAtgAAAt

>Fam\_386\_18\_2 Nr. of seq. 2 Alignment length(with gaps) = 18 Alignment score = 0.675926  
TTTCtTCAGaTGTTTaCg

>Fam\_387\_18\_2 Nr. of seq. 2 Alignment length(with gaps) = 18 Alignment score = 0.648148  
AAAACaaTAGAcAATGtc

>Fam\_388\_18\_2 Nr. of seq. 2 Alignment length(with gaps) = 18 Alignment score = 0.611111  
TATGAAAAaTaGGAcTtg

>Fam\_389\_18\_2 Nr. of seq. 2 Alignment length(with gaps) = 18 Alignment score = 0.629630  
aAGTTAGAgGaTgAGGAT

>Fam\_390\_18\_2 Nr. of seq. 2 Alignment length(with gaps) = 18 Alignment score = 0.629630  
AtTATaATGaACTCAcTA

>Fam\_391\_18\_2 Nr. of seq. 2 Alignment length(with gaps) = 18 Alignment score = 0.601852  
AAcTAtcGGAAcTACGGa

>Fam\_392\_18\_2 Nr. of seq. 2 Alignment length(with gaps) = 18 Alignment score = 0.638889  
cAgaTTTCTGGAAAAaATa

>Fam\_393\_18\_2 Nr. of seq. 2 Alignment length(with gaps) = 18 Alignment score = 0.666667  
TTTcAcaTTACTCTGtCC

>Fam\_394\_18\_2 Nr. of seq. 2 Alignment length(with gaps) = 18 Alignment score = 0.675926  
TAGAgAaAATACTaAATt

>Fam\_395\_18\_2 Nr. of seq. 2 Alignment length(with gaps) = 18 Alignment score = 0.666667  
TTCaAAcaTAaCAGATCC

>Fam\_396\_18\_2 Nr. of seq. 2 Alignment length(with gaps) = 18 Alignment score = 0.601852  
ACACTgACtATcaTTTAg

>Fam\_397\_18\_2 Nr. of seq. 2 Alignment length(with gaps) = 18 Alignment score = 0.703704  
TAGAAACTTGAgTaTAAT

>Fam\_398\_18\_2 Nr. of seq. 2 Alignment length(with gaps) = 18 Alignment score = 0.638889  
AaTAAcATTaCAcTATTc

>Fam\_399\_18\_2 Nr. of seq. 2 Alignment length(with gaps) = 18 Alignment score = 0.666667  
gACTgATTTaTaGTTCTA

>Fam\_400\_18\_2 Nr. of seq. 2 Alignment length(with gaps) = 18 Alignment score = 0.638889  
GAATAaaGAaTGGATTct

>Fam\_401\_18\_2 Nr. of seq. 2 Alignment length(with gaps) = 18 Alignment score = 0.666667  
AAgTAACATATTcCcTgA

>Fam\_402\_18\_2 Nr. of seq. 2 Alignment length(with gaps) = 18 Alignment score = 0.638889  
GTTCTATAaaaATCTaCCt

>Fam\_403\_18\_2 Nr. of seq. 2 Alignment length(with gaps) = 18 Alignment score = 0.638889  
aGATGAGaTTTGTcATac

>Fam\_404\_18\_2 Nr. of seq. 2 Alignment length(with gaps) = 18 Alignment score = 0.759259  
tTTTTAtTTTTTCACTaC

>Fam\_405\_18\_2 Nr. of seq. 2 Alignment length(with gaps) = 18 Alignment score = 0.666667  
TTcTCAGAAgATAcTaAG

>Fam\_406\_18\_2 Nr. of seq. 2 Alignment length(with gaps) = 18 Alignment score = 0.703704  
TaCcTCCTCTTCAGcCgG

>Fam\_407\_18\_2 Nr. of seq. 2 Alignment length(with gaps) = 18 Alignment score = 0.703704  
ACACCAgAAAACaAaaaA

>Fam\_408\_18\_2 Nr. of seq. 2 Alignment length(with gaps) = 18 Alignment score = 0.703704  
TATaTTcGTgaTCTTGAT

>Fam\_409\_18\_2 Nr. of seq. 2 Alignment length(with gaps) = 18 Alignment score = 0.629630  
AaTCTAAAaAacAGTcTG

>Fam\_410\_18\_2 Nr. of seq. 2 Alignment length(with gaps) = 18 Alignment score = 0.703704  
GATACAGaAGAcACgGaT

>Fam\_411\_18\_2 Nr. of seq. 2 Alignment length(with gaps) = 18 Alignment score = 0.629630  
ATcCGGgAGaTGgAAaGT

>Fam\_412\_18\_2 Nr. of seq. 2 Alignment length(with gaps) = 18 Alignment score = 0.703704  
aTaCCGAcGCGGACaACG

>Fam\_413\_18\_2 Nr. of seq. 2 Alignment length(with gaps) = 18 Alignment score = 1.000000  
TCTACTCCAGTTAATACA

>Fam\_414\_18\_2 Nr. of seq. 2 Alignment length(with gaps) = 18 Alignment score = 0.851852  
TAATCTTaGAATTCCTTc

>Fam\_415\_18\_2 Nr. of seq. 2 Alignment length(with gaps) = 18 Alignment score = 0.629630  
TgGTTAATCcaTacTATC

>Fam\_416\_18\_2 Nr. of seq. 2 Alignment length(with gaps) = 18 Alignment score = 0.629630  
ATTTATCcTAAccTTcTa

>Fam\_417\_18\_2 Nr. of seq. 2 Alignment length(with gaps) = 18 Alignment score = 0.648148  
AaAGgAAaCagAGAAAAC

>Fam\_418\_18\_2 Nr. of seq. 2 Alignment length(with gaps) = 18 Alignment score = 0.629630  
ATCTCACTaACaacTAac

>Fam\_419\_18\_2 Nr. of seq. 2 Alignment length(with gaps) = 18 Alignment score = 0.629630  
ACTCCAGcTacGGaAGaA

>Fam\_420\_18\_2 Nr. of seq. 2 Alignment length(with gaps) = 18 Alignment score = 0.777778  
TCcTcAAATCTCAGcTTTT

>Fam\_421\_18\_2 Nr. of seq. 2 Alignment length(with gaps) = 18 Alignment score = 0.777778  
AaTAGAaCcGATAATGAG

>Fam\_422\_17\_2 Nr. of seq. 2 Alignment length(with gaps) = 17 Alignment score = 0.666667  
ACTGGAAATcaCTTTtt

>Fam\_423\_17\_2 Nr. of seq. 2 Alignment length(with gaps) = 17 Alignment score = 0.627451  
TCaGAGCCaCTgTCCta

>Fam\_424\_17\_2 Nr. of seq. 2 Alignment length(with gaps) = 17 Alignment score = 0.607843  
CCaTcGTGTTTcTaATC

>Fam\_425\_17\_2 Nr. of seq. 2 Alignment length(with gaps) = 17 Alignment score = 0.735294  
gAAAAAATAGtTGAGAt

>Fam\_426\_17\_2 Nr. of seq. 2 Alignment length(with gaps) = 17 Alignment score = 0.705882  
AgTTTAAGGAAGaAGta

>Fam\_427\_17\_2 Nr. of seq. 2 Alignment length(with gaps) = 17 Alignment score = 0.735294  
tTTCTTTTaATTCCCTTc

>Fam\_428\_17\_2 Nr. of seq. 2 Alignment length(with gaps) = 17 Alignment score = 0.735294  
ATAGaCTAAAAAtTCCAg

>Fam\_429\_17\_2 Nr. of seq. 2 Alignment length(with gaps) = 17 Alignment score = 0.627451  
CcTTTAgTTTATCTgTa

>Fam\_430\_17\_2 Nr. of seq. 2 Alignment length(with gaps) = 17 Alignment score = 0.705882  
GAAAAATAGAGAggAca



>Fam\_431\_17\_2 Nr. of seq. 2 Alignment length(with gaps) = 17 Alignment score = 0.666667  
cCAAAtGAGGAGAATta

>Fam\_432\_17\_2 Nr. of seq. 2 Alignment length(with gaps) = 17 Alignment score = 0.696078  
aATTTCTTcAGAGcTAT

>Fam\_433\_17\_2 Nr. of seq. 2 Alignment length(with gaps) = 17 Alignment score = 0.725490  
TTAACAGCtaCTTATaG

>Fam\_434\_17\_2 Nr. of seq. 2 Alignment length(with gaps) = 17 Alignment score = 0.656863  
ATTTGAgTTAGTgTaAt

>Fam\_435\_17\_2 Nr. of seq. 2 Alignment length(with gaps) = 17 Alignment score = 0.735294  
AAAaTAAGATTGtGGTc

>Fam\_436\_17\_2 Nr. of seq. 2 Alignment length(with gaps) = 17 Alignment score = 0.647059  
caAAGaTAAAGcTCCTA

>Fam\_437\_17\_2 Nr. of seq. 2 Alignment length(with gaps) = 17 Alignment score = 0.686275  
TAcAAGAGAAGtATCaT

>Fam\_438\_17\_2 Nr. of seq. 2 Alignment length(with gaps) = 17 Alignment score = 0.656863  
TTTTTAAAtTCAAgAaGTa

>Fam\_439\_17\_2 Nr. of seq. 2 Alignment length(with gaps) = 17 Alignment score = 0.725490  
TTACTTAcTaTTACTGT

>Fam\_440\_17\_2 Nr. of seq. 2 Alignment length(with gaps) = 17 Alignment score = 0.725490  
AGaTAAGAGAGTTAagA

>Fam\_441\_17\_2 Nr. of seq. 2 Alignment length(with gaps) = 17 Alignment score = 0.686275  
GAcTATGTGaATTCgTA

>Fam\_442\_17\_2 Nr. of seq. 2 Alignment length(with gaps) = 17 Alignment score = 0.725490  
TGTAAAaTCATTacTCT

>Fam\_443\_17\_2 Nr. of seq. 2 Alignment length(with gaps) = 17 Alignment score = 0.656863  
cCTAAcTaATTGaCTTT

>Fam\_444\_17\_2 Nr. of seq. 2 Alignment length(with gaps) = 17 Alignment score = 0.647059  
TAAAaccTAAAgAaGAG

>Fam\_445\_17\_2 Nr. of seq. 2 Alignment length(with gaps) = 17 Alignment score = 0.774510  
AAGGAAGTAaAATcAAt

>Fam\_446\_17\_2 Nr. of seq. 2 Alignment length(with gaps) = 17 Alignment score = 0.696078  
AcTCTCAAAaTCTCAat

>Fam\_447\_17\_2 Nr. of seq. 2 Alignment length(with gaps) = 17 Alignment score = 0.725490  
TATTTaGTTCAAAatTaA

>Fam\_448\_17\_2 Nr. of seq. 2 Alignment length(with gaps) = 17 Alignment score = 0.647059  
TTCAgCTTTAAcaaTCT

>Fam\_449\_17\_2 Nr. of seq. 2 Alignment length(with gaps) = 17 Alignment score = 0.696078  
ATGAAaTTaAGAGTgAa

>Fam\_450\_17\_2 Nr. of seq. 2 Alignment length(with gaps) = 17 Alignment score = 0.686275  
TGGATGaAATCTGaTAc

>Fam\_451\_17\_2 Nr. of seq. 2 Alignment length(with gaps) = 17 Alignment score = 0.647059  
CTGtTCTTCAaAAATaAc

>Fam\_452\_17\_2 Nr. of seq. 2 Alignment length(with gaps) = 17 Alignment score = 0.725490  
TCTTCaAATTcATAGgC

>Fam\_453\_17\_2 Nr. of seq. 2 Alignment length(with gaps) = 17 Alignment score = 0.647059  
ACTTAGAACTAcgTAaa

>Fam\_454\_17\_2 Nr. of seq. 2 Alignment length(with gaps) = 17 Alignment score = 0.725490  
TAACATATcAAAaCGAaT

>Fam\_455\_17\_2 Nr. of seq. 2 Alignment length(with gaps) = 17 Alignment score = 0.647059  
AAGTAaGGAGaAACaca

>Fam\_456\_17\_2 Nr. of seq. 2 Alignment length(with gaps) = 17 Alignment score = 0.725490  
aGTTTCAATcATAAtTC

>Fam\_457\_17\_2 Nr. of seq. 2 Alignment length(with gaps) = 17 Alignment score = 0.764706  
aAcTTaCTTTTTATCTT

>Fam\_458\_17\_2 Nr. of seq. 2 Alignment length(with gaps) = 17 Alignment score = 0.686275  
TAcCTTTTTgaTTTCaC

>Fam\_459\_17\_2 Nr. of seq. 2 Alignment length(with gaps) = 17 Alignment score = 0.607843  
ATCaATTATAaAaaGaC

>Fam\_460\_17\_2 Nr. of seq. 2 Alignment length(with gaps) = 17 Alignment score = 0.921569  
TTAAACAAACCTTAaAC

>Fam\_461\_17\_2 Nr. of seq. 2 Alignment length(with gaps) = 17 Alignment score = 0.686275  
AGcTACaAAAATgaATT

>Fam\_462\_17\_2 Nr. of seq. 2 Alignment length(with gaps) = 17 Alignment score = 0.607843  
AcAcAGccAaAACTTCT

>Fam\_463\_17\_2 Nr. of seq. 2 Alignment length(with gaps) = 17 Alignment score = 0.686275  
TGTcATTAActgAATac

>Fam\_464\_17\_2 Nr. of seq. 2 Alignment length(with gaps) = 17 Alignment score = 0.686275  
TTTTCTAaaTaGAaATC

>Fam\_465\_17\_2 Nr. of seq. 2 Alignment length(with gaps) = 17 Alignment score = 0.607843  
aaATCAgATTaATGAcG

>Fam\_466\_16\_2 Nr. of seq. 2 Alignment length(with gaps) = 16 Alignment score = 0.625000  
aTaacaTAccacctcc

>Fam\_467\_16\_2 Nr. of seq. 2 Alignment length(with gaps) = 16 Alignment score = 0.635417  
CATAAcCTTGACatCa

>Fam\_468\_16\_2 Nr. of seq. 2 Alignment length(with gaps) = 16 Alignment score = 0.729167  
ATTaTAGAATGTAAga

>Fam\_469\_16\_2 Nr. of seq. 2 Alignment length(with gaps) = 16 Alignment score = 0.677083  
cGGTTTAcATTaAATC

>Fam\_470\_16\_2 Nr. of seq. 2 Alignment length(with gaps) = 16 Alignment score = 0.718750  
TTCAAATGAgTAAATa

>Fam\_471\_16\_2 Nr. of seq. 2 Alignment length(with gaps) = 16 Alignment score = 0.645833  
TTGcGaGAATTTCTag

>Fam\_472\_16\_2 Nr. of seq. 2 Alignment length(with gaps) = 16 Alignment score = 0.687500  
taGACAAGAAATTCATG

>Fam\_473\_16\_2 Nr. of seq. 2 Alignment length(with gaps) = 16 Alignment score = 0.718750  
GcTTTTTAtATTTTGa

>Fam\_474\_16\_2 Nr. of seq. 2 Alignment length(with gaps) = 16 Alignment score = 0.687500  
AAAACCaTTTaCTCaa

>Fam\_475\_16\_2 Nr. of seq. 2 Alignment length(with gaps) = 16 Alignment score = 0.718750  
AAGACGTTTTCaTcAa

>Fam\_476\_16\_2 Nr. of seq. 2 Alignment length(with gaps) = 16 Alignment score = 0.718750  
TTAGACTgTTaCAAGc

>Fam\_477\_16\_2 Nr. of seq. 2 Alignment length(with gaps) = 16 Alignment score = 0.687500  
AAAACCTGaAaAAGgt

>Fam\_478\_16\_2 Nr. of seq. 2 Alignment length(with gaps) = 16 Alignment score = 0.708333  
TGaTTCGGTGGtTcGG

>Fam\_479\_16\_2 Nr. of seq. 2 Alignment length(with gaps) = 16 Alignment score = 0.666667  
GAACtAAcACaAACTA

>Fam\_480\_16\_2 Nr. of seq. 2 Alignment length(with gaps) = 16 Alignment score = 0.625000  
cTCTGaaTGGTAGTAc

>Fam\_481\_16\_2 Nr. of seq. 2 Alignment length(with gaps) = 16 Alignment score = 0.677083  
TATTgTGcAGTAAcAt

>Fam\_482\_16\_2 Nr. of seq. 2 Alignment length(with gaps) = 16 Alignment score = 0.677083  
TccTTGTATTcCAGAt

>Fam\_483\_16\_2 Nr. of seq. 2 Alignment length(with gaps) = 16 Alignment score = 0.625000  
CTTAaCtCaAATcAAG

>Fam\_484\_16\_2 Nr. of seq. 2 Alignment length(with gaps) = 16 Alignment score = 0.708333  
cGATGTTATcTTTTAa

>Fam\_485\_16\_2 Nr. of seq. 2 Alignment length(with gaps) = 16 Alignment score = 0.791667  
ATTGATTTGTaTTgAG

>Fam\_486\_16\_2 Nr. of seq. 2 Alignment length(with gaps) = 16 Alignment score = 0.708333  
TGTAaTTCTCTaTTCa

>Fam\_487\_16\_2 Nr. of seq. 2 Alignment length(with gaps) = 16 Alignment score = 0.718750  
taTTCATAGAtCTTGA

>Fam\_488\_16\_2 Nr. of seq. 2 Alignment length(with gaps) = 16 Alignment score = 0.677083  
tCTGAaTTTCAaAAaA  
>Fam\_489\_16\_2 Nr. of seq. 2 Alignment length(with gaps) = 16 Alignment score = 0.708333  
TTaAAAAACATaTTa  
>Fam\_490\_16\_2 Nr. of seq. 2 Alignment length(with gaps) = 16 Alignment score = 0.677083  
AAcCTATTGAaATTga  
>Fam\_491\_16\_2 Nr. of seq. 2 Alignment length(with gaps) = 16 Alignment score = 0.760417  
ATTTgcTTcCTGCTTa  
>Fam\_492\_16\_2 Nr. of seq. 2 Alignment length(with gaps) = 16 Alignment score = 0.760417  
ACAATaAAAGGAAaAc  
>Fam\_493\_16\_2 Nr. of seq. 2 Alignment length(with gaps) = 16 Alignment score = 0.666667  
AATAAgAAAGcAgAAT  
>Fam\_494\_16\_2 Nr. of seq. 2 Alignment length(with gaps) = 16 Alignment score = 0.708333  
ATaAATCAAAGTAAaA  
>Fam\_495\_16\_2 Nr. of seq. 2 Alignment length(with gaps) = 16 Alignment score = 0.708333  
AAAAGAGTAgAgAAaG  
>Fam\_496\_16\_2 Nr. of seq. 2 Alignment length(with gaps) = 16 Alignment score = 0.760417  
AAAaTGAAATGAAgTc  
>Fam\_497\_16\_2 Nr. of seq. 2 Alignment length(with gaps) = 16 Alignment score = 0.708333  
AATATAAAaTGacACA  
>Fam\_498\_16\_2 Nr. of seq. 2 Alignment length(with gaps) = 16 Alignment score = 0.635417  
ATTTCAaTATaaCCGg  
>Fam\_499\_16\_2 Nr. of seq. 2 Alignment length(with gaps) = 16 Alignment score = 0.760417  
AcAaTTACCTGAAATt  
>Fam\_500\_16\_2 Nr. of seq. 2 Alignment length(with gaps) = 16 Alignment score = 0.677083  
TGAGGaAaTcAATCCc  
>Fam\_501\_16\_2 Nr. of seq. 2 Alignment length(with gaps) = 16 Alignment score = 0.666667  
cTACcAAAaAAaCTAG  
>Fam\_502\_16\_2 Nr. of seq. 2 Alignment length(with gaps) = 16 Alignment score = 0.666667  
GGaTTaGaTAGTTaAT  
>Fam\_503\_16\_2 Nr. of seq. 2 Alignment length(with gaps) = 16 Alignment score = 0.666667  
aTTTaCcgGTTAACGG  
>Fam\_504\_16\_2 Nr. of seq. 2 Alignment length(with gaps) = 16 Alignment score = 0.666667  
ATaTaTaaGATCTGAA  
>Fam\_505\_16\_2 Nr. of seq. 2 Alignment length(with gaps) = 16 Alignment score = 0.750000  
GAAGaAgTCTATaCAG  
>Fam\_506\_16\_2 Nr. of seq. 2 Alignment length(with gaps) = 16 Alignment score = 0.750000  
CAaTAATCTAGaaCTC

>Fam\_507\_16\_2 Nr. of seq. 2 Alignment length(with gaps) = 16 Alignment score = 0.833333  
TGACTTCaTACCTTAc

>Fam\_508\_16\_2 Nr. of seq. 2 Alignment length(with gaps) = 16 Alignment score = 0.666667  
cTTTTATTGAAACaAg

>Fam\_509\_16\_2 Nr. of seq. 2 Alignment length(with gaps) = 16 Alignment score = 0.833333  
ATTaGCTAAaTTATGG

>Fam\_510\_16\_2 Nr. of seq. 2 Alignment length(with gaps) = 16 Alignment score = 0.750000  
AcTTATaTCGAAcTTT

>Fam\_511\_16\_2 Nr. of seq. 2 Alignment length(with gaps) = 16 Alignment score = 0.750000  
TTAAcCAGCTCTAAAA

>Fam\_512\_16\_2 Nr. of seq. 2 Alignment length(with gaps) = 16 Alignment score = 0.666667  
TTAaTCAGAACTTcaG

>Fam\_513\_16\_2 Nr. of seq. 2 Alignment length(with gaps) = 16 Alignment score = 0.666667  
TTCaTTAgATaTATTC

>Fam\_514\_16\_2 Nr. of seq. 2 Alignment length(with gaps) = 16 Alignment score = 0.854167  
CTCTAATCAAAAGTcA

>Fam\_515\_16\_2 Nr. of seq. 2 Alignment length(with gaps) = 16 Alignment score = 0.916667  
TCCcAACCGCGCTCGC

>Fam\_516\_15\_2 Nr. of seq. 2 Alignment length(with gaps) = 15 Alignment score = 0.677778  
TaTCGTTCTCGCcgT

>Fam\_517\_15\_2 Nr. of seq. 2 Alignment length(with gaps) = 15 Alignment score = 0.677778  
tctTCGGATTcGgAG

>Fam\_518\_15\_2 Nr. of seq. 2 Alignment length(with gaps) = 15 Alignment score = 0.611111  
cTAATTTCTAGtagG

>Fam\_519\_15\_2 Nr. of seq. 2 Alignment length(with gaps) = 15 Alignment score = 0.700000  
CGTGGTCGTCGtgat

>Fam\_520\_15\_2 Nr. of seq. 2 Alignment length(with gaps) = 15 Alignment score = 0.677778  
aCGACGACGTTGagg

>Fam\_521\_15\_2 Nr. of seq. 2 Alignment length(with gaps) = 15 Alignment score = 0.677778  
GATAGAcATAGAgat

>Fam\_522\_15\_2 Nr. of seq. 2 Alignment length(with gaps) = 15 Alignment score = 0.700000  
AGCTaAACCaAAGGAt

>Fam\_523\_15\_2 Nr. of seq. 2 Alignment length(with gaps) = 15 Alignment score = 0.700000  
aTTTAATAAcTGCTa

>Fam\_524\_15\_2 Nr. of seq. 2 Alignment length(with gaps) = 15 Alignment score = 0.733333  
TCTATgAAAGATgAA

>Fam\_525\_15\_2 Nr. of seq. 2 Alignment length(with gaps) = 15 Alignment score = 0.666667  
TaATATCGATTGagg

>Fam\_526\_15\_2 Nr. of seq. 2 Alignment length(with gaps) = 15 Alignment score = 0.666667  
ACAcATTGTCATCag

>Fam\_527\_15\_2 Nr. of seq. 2 Alignment length(with gaps) = 15 Alignment score = 0.655556  
TgAAAaATGCTAaAt

>Fam\_528\_15\_2 Nr. of seq. 2 Alignment length(with gaps) = 15 Alignment score = 0.744444  
aAGTGTTCCTcAAAc

>Fam\_529\_15\_2 Nr. of seq. 2 Alignment length(with gaps) = 15 Alignment score = 0.688889  
TTATGGAcCcAtTTA

>Fam\_530\_15\_2 Nr. of seq. 2 Alignment length(with gaps) = 15 Alignment score = 0.777778  
TTATTTTCTTCaGtG

>Fam\_531\_15\_2 Nr. of seq. 2 Alignment length(with gaps) = 15 Alignment score = 0.688889  
TTgGGAATAtGTAAa

>Fam\_532\_15\_2 Nr. of seq. 2 Alignment length(with gaps) = 15 Alignment score = 0.744444  
aATgACATATTGAGg

>Fam\_533\_15\_2 Nr. of seq. 2 Alignment length(with gaps) = 15 Alignment score = 0.611111  
aACTTAcAaATCTGg

>Fam\_534\_15\_2 Nr. of seq. 2 Alignment length(with gaps) = 15 Alignment score = 0.700000  
tTCAAagAGAAcATA

>Fam\_535\_15\_2 Nr. of seq. 2 Alignment length(with gaps) = 15 Alignment score = 0.655556  
AcATAGcAATTaTAA

>Fam\_536\_15\_2 Nr. of seq. 2 Alignment length(with gaps) = 15 Alignment score = 0.666667  
taTCTAATAAaTTCa

>Fam\_537\_15\_2 Nr. of seq. 2 Alignment length(with gaps) = 15 Alignment score = 0.688889  
cTACTAAGAAaAGtG

>Fam\_538\_15\_2 Nr. of seq. 2 Alignment length(with gaps) = 15 Alignment score = 0.611111  
tTTaCAGgGTAGtCA

>Fam\_539\_15\_2 Nr. of seq. 2 Alignment length(with gaps) = 15 Alignment score = 0.744444  
TCCCTTaAATcCAGt

>Fam\_540\_15\_2 Nr. of seq. 2 Alignment length(with gaps) = 15 Alignment score = 0.744444  
AAaTgAAAaACTTGGa

>Fam\_541\_15\_2 Nr. of seq. 2 Alignment length(with gaps) = 15 Alignment score = 0.688889  
TGTcAAGcTgTGAT

>Fam\_542\_15\_2 Nr. of seq. 2 Alignment length(with gaps) = 15 Alignment score = 0.733333  
TCAAGcCTTAAgTTA

>Fam\_543\_15\_2 Nr. of seq. 2 Alignment length(with gaps) = 15 Alignment score = 0.655556  
AACcAAGaAGAcCCa

>Fam\_544\_15\_2 Nr. of seq. 2 Alignment length(with gaps) = 15 Alignment score = 0.644444  
TTgATGCTGcTTaAC

>Fam\_545\_15\_2 Nr. of seq. 2 Alignment length(with gaps) = 15 Alignment score = 0.655556  
AcAAacAAGTTCAGa

>Fam\_546\_15\_2 Nr. of seq. 2 Alignment length(with gaps) = 15 Alignment score = 0.655556  
GAAaAcTAAGAATac

>Fam\_547\_15\_2 Nr. of seq. 2 Alignment length(with gaps) = 15 Alignment score = 0.688889  
TaAGAGTTTcATCAa

>Fam\_548\_15\_2 Nr. of seq. 2 Alignment length(with gaps) = 15 Alignment score = 0.655556  
aCAGcTTAAAGTCTg

>Fam\_549\_15\_2 Nr. of seq. 2 Alignment length(with gaps) = 15 Alignment score = 0.655556  
GAGAAaTAGgTATCct

>Fam\_550\_15\_2 Nr. of seq. 2 Alignment length(with gaps) = 15 Alignment score = 0.688889  
TTTTTaAGtATCcCT

>Fam\_551\_15\_2 Nr. of seq. 2 Alignment length(with gaps) = 15 Alignment score = 0.744444  
ATaTTTTCTTcTTAc

>Fam\_552\_15\_2 Nr. of seq. 2 Alignment length(with gaps) = 15 Alignment score = 0.733333  
CGAaGACGACaCcGA

>Fam\_553\_15\_2 Nr. of seq. 2 Alignment length(with gaps) = 15 Alignment score = 0.822222  
CGCCGTTCTCcTCgT

>Fam\_554\_15\_2 Nr. of seq. 2 Alignment length(with gaps) = 15 Alignment score = 0.733333  
CaCCAGAAaTCATCAg

>Fam\_555\_15\_2 Nr. of seq. 2 Alignment length(with gaps) = 15 Alignment score = 0.733333  
TTTAAGTaATcTAaT

>Fam\_556\_15\_2 Nr. of seq. 2 Alignment length(with gaps) = 15 Alignment score = 0.644444  
TTGaTTCTaTaCCTa

>Fam\_557\_15\_2 Nr. of seq. 2 Alignment length(with gaps) = 15 Alignment score = 0.755556  
AGAGAAAGAAaGacT

>Fam\_558\_15\_2 Nr. of seq. 2 Alignment length(with gaps) = 15 Alignment score = 0.644444  
cTTTACTTaCCaaAC

>Fam\_559\_15\_2 Nr. of seq. 2 Alignment length(with gaps) = 15 Alignment score = 0.911111  
GGAACCAGTGACAAc

>Fam\_560\_15\_2 Nr. of seq. 2 Alignment length(with gaps) = 15 Alignment score = 0.733333  
AGATTCATcCAaTTa

>Fam\_561\_15\_2 Nr. of seq. 2 Alignment length(with gaps) = 15 Alignment score = 0.644444  
TTaTGAAaCgATGTa

>Fam\_562\_15\_2 Nr. of seq. 2 Alignment length(with gaps) = 15 Alignment score = 0.644444  
aTAcTCTCaaCTAAA

>Fam\_563\_15\_2 Nr. of seq. 2 Alignment length(with gaps) = 15 Alignment score = 0.733333  
CaTTTTTTCATAaCT

>Fam\_564\_15\_2 Nr. of seq. 2 Alignment length(with gaps) = 15 Alignment score = 0.644444  
aaAGGTcATTTTCGgT

>Fam\_565\_15\_2 Nr. of seq. 2 Alignment length(with gaps) = 15 Alignment score = 0.733333  
TaaTTACgGATCAAA

>Fam\_566\_15\_2 Nr. of seq. 2 Alignment length(with gaps) = 15 Alignment score = 0.644444  
TCaATCCcTCTATga

>Fam\_567\_15\_2 Nr. of seq. 2 Alignment length(with gaps) = 15 Alignment score = 0.644444  
aTacTTTCATTTCCa

>Fam\_568\_15\_2 Nr. of seq. 2 Alignment length(with gaps) = 15 Alignment score = 1.000000  
AGCTACAATTTGCTA

>Fam\_569\_15\_2 Nr. of seq. 2 Alignment length(with gaps) = 15 Alignment score = 0.733333  
CTcTTCTaCTaCATC

>Fam\_570\_15\_2 Nr. of seq. 2 Alignment length(with gaps) = 15 Alignment score = 0.733333  
TTCATCAaCaTaGAT

>Fam\_571\_15\_2 Nr. of seq. 2 Alignment length(with gaps) = 15 Alignment score = 0.644444  
TaacTGAGAGAAaGT

>Fam\_572\_15\_2 Nr. of seq. 2 Alignment length(with gaps) = 15 Alignment score = 0.733333  
CAATTTCCGAacCTg

>Fam\_573\_15\_2 Nr. of seq. 2 Alignment length(with gaps) = 15 Alignment score = 0.644444  
CaTCTaCTCTTAAaG

>Fam\_574\_14\_2 Nr. of seq. 2 Alignment length(with gaps) = 14 Alignment score = 0.750000  
catAACTCTAAATG

>Fam\_575\_14\_2 Nr. of seq. 2 Alignment length(with gaps) = 14 Alignment score = 0.654762  
aAATGaAAGTGAac

>Fam\_576\_14\_2 Nr. of seq. 2 Alignment length(with gaps) = 14 Alignment score = 0.773810  
GAACgGGGAACGGg

>Fam\_577\_14\_2 Nr. of seq. 2 Alignment length(with gaps) = 14 Alignment score = 0.678571  
CTACcGaCCACCAa

>Fam\_578\_14\_2 Nr. of seq. 2 Alignment length(with gaps) = 14 Alignment score = 0.678571  
ATTGAcCATcCTTa

>Fam\_579\_14\_2 Nr. of seq. 2 Alignment length(with gaps) = 14 Alignment score = 0.773810  
TGAGtTTATTcAGa

>Fam\_580\_14\_2 Nr. of seq. 2 Alignment length(with gaps) = 14 Alignment score = 0.642857  
tgAGAcTCTAACTg

>Fam\_581\_14\_2 Nr. of seq. 2 Alignment length(with gaps) = 14 Alignment score = 0.678571  
ATaGTGGAATcAGg

>Fam\_582\_14\_2 Nr. of seq. 2 Alignment length(with gaps) = 14 Alignment score = 0.678571  
TTTGtCGCTTAcTt



>Fam\_583\_14\_2 Nr. of seq. 2 Alignment length(with gaps) = 14 Alignment score = 0.726190  
cgAaTTTATCTATC

>Fam\_584\_14\_2 Nr. of seq. 2 Alignment length(with gaps) = 14 Alignment score = 0.761905  
TCATTTaTCgCTTC

>Fam\_585\_14\_2 Nr. of seq. 2 Alignment length(with gaps) = 14 Alignment score = 0.761905  
TgAGGtTATTAGAG

>Fam\_586\_14\_2 Nr. of seq. 2 Alignment length(with gaps) = 14 Alignment score = 0.678571  
aAAACgTAAATGGc

>Fam\_587\_14\_2 Nr. of seq. 2 Alignment length(with gaps) = 14 Alignment score = 0.726190  
GTTcATaAaATTCa

>Fam\_588\_14\_2 Nr. of seq. 2 Alignment length(with gaps) = 14 Alignment score = 0.666667  
AaAcTCTGATAcTT

>Fam\_589\_14\_2 Nr. of seq. 2 Alignment length(with gaps) = 14 Alignment score = 0.726190  
aATAACCAGAAATaa

>Fam\_590\_14\_2 Nr. of seq. 2 Alignment length(with gaps) = 14 Alignment score = 0.726190  
TCTcACTTTTgAGa

>Fam\_591\_14\_2 Nr. of seq. 2 Alignment length(with gaps) = 14 Alignment score = 0.726190  
TTTCAGAAaCaACc

>Fam\_592\_14\_2 Nr. of seq. 2 Alignment length(with gaps) = 14 Alignment score = 0.666667  
aTTTCgCAAGcAAT

>Fam\_593\_14\_2 Nr. of seq. 2 Alignment length(with gaps) = 14 Alignment score = 0.666667  
cTGAATaAATAgTC

>Fam\_594\_14\_2 Nr. of seq. 2 Alignment length(with gaps) = 14 Alignment score = 0.726190  
gCAGACaTTAAaAC

>Fam\_595\_14\_2 Nr. of seq. 2 Alignment length(with gaps) = 14 Alignment score = 0.666667  
AgAAACaTTAGgAG

>Fam\_596\_14\_2 Nr. of seq. 2 Alignment length(with gaps) = 14 Alignment score = 0.726190  
TGAAaaATAAAAcT

>Fam\_597\_14\_2 Nr. of seq. 2 Alignment length(with gaps) = 14 Alignment score = 0.726190  
AaGAAATGTTcAGg

>Fam\_598\_14\_2 Nr. of seq. 2 Alignment length(with gaps) = 14 Alignment score = 0.738095  
TagAATAATAAcTT

>Fam\_599\_14\_2 Nr. of seq. 2 Alignment length(with gaps) = 14 Alignment score = 0.714286  
GGATTATTCgcaAC

>Fam\_600\_14\_2 Nr. of seq. 2 Alignment length(with gaps) = 14 Alignment score = 0.714286  
TcAcTAAAcTgAAT

>Fam\_601\_14\_2 Nr. of seq. 2 Alignment length(with gaps) = 14 Alignment score = 0.619048  
TcAAcGAAaGCAaa

>Fam\_602\_14\_2 Nr. of seq. 2 Alignment length(with gaps) = 14 Alignment score = 0.809524  
GTAAaCTGTAAaCT

>Fam\_603\_14\_2 Nr. of seq. 2 Alignment length(with gaps) = 14 Alignment score = 0.809524  
AAGaaATCAATTGA

>Fam\_604\_14\_2 Nr. of seq. 2 Alignment length(with gaps) = 14 Alignment score = 0.619048  
aAaaAaTgaaTGTC

>Fam\_605\_14\_2 Nr. of seq. 2 Alignment length(with gaps) = 14 Alignment score = 0.714286  
TTTGaAGAAAcCAg

>Fam\_606\_14\_2 Nr. of seq. 2 Alignment length(with gaps) = 14 Alignment score = 0.714286  
GAAGGaATTTaAcA

>Fam\_607\_14\_2 Nr. of seq. 2 Alignment length(with gaps) = 14 Alignment score = 0.809524  
ATaAAaTACCAAGA

>Fam\_608\_14\_2 Nr. of seq. 2 Alignment length(with gaps) = 14 Alignment score = 0.904762  
CAACTCTGCTGGCa

>Fam\_609\_14\_2 Nr. of seq. 2 Alignment length(with gaps) = 14 Alignment score = 0.619048  
AAaAGgTTGaAaTG

>Fam\_610\_14\_2 Nr. of seq. 2 Alignment length(with gaps) = 14 Alignment score = 0.714286  
aAAAaTgGTTAGTT

>Fam\_611\_14\_2 Nr. of seq. 2 Alignment length(with gaps) = 14 Alignment score = 0.714286  
TGATgaACTCAaAC

>Fam\_612\_13\_2 Nr. of seq. 2 Alignment length(with gaps) = 13 Alignment score = 0.717949  
AAaAACAAAGGcg

>Fam\_613\_13\_2 Nr. of seq. 2 Alignment length(with gaps) = 13 Alignment score = 0.653846  
cTCGgCATCATcA

>Fam\_614\_13\_2 Nr. of seq. 2 Alignment length(with gaps) = 13 Alignment score = 0.756410  
tGTTCaTGATTCA

>Fam\_615\_13\_2 Nr. of seq. 2 Alignment length(with gaps) = 13 Alignment score = 0.743590  
AaAGAAGtGAAT

>Fam\_616\_13\_2 Nr. of seq. 2 Alignment length(with gaps) = 13 Alignment score = 0.705128  
AaGACcCAAGTct

>Fam\_617\_13\_2 Nr. of seq. 2 Alignment length(with gaps) = 13 Alignment score = 0.705128  
TCCCTaGTTaCTa

>Fam\_618\_13\_2 Nr. of seq. 2 Alignment length(with gaps) = 13 Alignment score = 0.743590  
CATTTCaTTgCT

>Fam\_619\_13\_2 Nr. of seq. 2 Alignment length(with gaps) = 13 Alignment score = 0.653846  
aTATCTTcTaa

>Fam\_620\_13\_2 Nr. of seq. 2 Alignment length(with gaps) = 13 Alignment score = 0.641026  
CAtTCTaAcCATC

>Fam\_621\_13\_2 Nr. of seq. 2 Alignment length(with gaps) = 13 Alignment score = 0.705128  
aATATTTGTgTCg  
>Fam\_622\_13\_2 Nr. of seq. 2 Alignment length(with gaps) = 13 Alignment score = 0.705128  
AGGTAAaTTTgATc  
>Fam\_623\_13\_2 Nr. of seq. 2 Alignment length(with gaps) = 13 Alignment score = 0.705128  
GTCAGGaAAaCTg  
>Fam\_624\_13\_2 Nr. of seq. 2 Alignment length(with gaps) = 13 Alignment score = 0.705128  
CAaTGAAAAaATc  
>Fam\_625\_13\_2 Nr. of seq. 2 Alignment length(with gaps) = 13 Alignment score = 0.705128  
AaATcTTATCAAg  
>Fam\_626\_13\_2 Nr. of seq. 2 Alignment length(with gaps) = 13 Alignment score = 0.743590  
ATgCcTTTTTATC  
>Fam\_627\_13\_2 Nr. of seq. 2 Alignment length(with gaps) = 13 Alignment score = 0.705128  
TTACTGTTcTGgg  
>Fam\_628\_13\_2 Nr. of seq. 2 Alignment length(with gaps) = 13 Alignment score = 0.705128  
ATTaCCCTGTTgt  
>Fam\_629\_13\_2 Nr. of seq. 2 Alignment length(with gaps) = 13 Alignment score = 0.692308  
GaTAAAAaAAcTG  
>Fam\_630\_13\_2 Nr. of seq. 2 Alignment length(with gaps) = 13 Alignment score = 0.692308  
TGATCCAGAAcAa  
>Fam\_631\_13\_2 Nr. of seq. 2 Alignment length(with gaps) = 13 Alignment score = 0.794872  
ATTcTGTaTTAAG  
>Fam\_632\_13\_2 Nr. of seq. 2 Alignment length(with gaps) = 13 Alignment score = 0.794872  
CACTTTCaTTcCC  
>Fam\_633\_13\_2 Nr. of seq. 2 Alignment length(with gaps) = 13 Alignment score = 0.692308  
aAAcATTaAATCG  
>Fam\_634\_13\_2 Nr. of seq. 2 Alignment length(with gaps) = 13 Alignment score = 0.794872  
GaAAGAAAGAcAT  
>Fam\_635\_13\_2 Nr. of seq. 2 Alignment length(with gaps) = 13 Alignment score = 0.692308  
agACAGGcAAAAA  
>Fam\_636\_13\_2 Nr. of seq. 2 Alignment length(with gaps) = 13 Alignment score = 0.692308  
aCAAgTAaTAAAG  
>Fam\_637\_13\_2 Nr. of seq. 2 Alignment length(with gaps) = 13 Alignment score = 0.692308  
TTgTTTATgGAaG  
>Fam\_638\_13\_2 Nr. of seq. 2 Alignment length(with gaps) = 13 Alignment score = 0.692308  
CAaAgcTTAATTA  
>Fam\_639\_12\_2 Nr. of seq. 2 Alignment length(with gaps) = 12 Alignment score = 0.694444  
TATCaTAAAAtg

>Fam\_640\_12\_2 Nr. of seq. 2 Alignment length(with gaps) = 12 Alignment score = 0.666667  
 TTTTGGaCtAC  
 >Fam\_641\_12\_2 Nr. of seq. 2 Alignment length(with gaps) = 12 Alignment score = 0.680556  
 aCCTGATAAcTc  
 >Fam\_642\_12\_2 Nr. of seq. 2 Alignment length(with gaps) = 12 Alignment score = 0.680556  
 TTaAATaTTCGg  
 >Fam\_643\_12\_2 Nr. of seq. 2 Alignment length(with gaps) = 12 Alignment score = 0.680556  
 AGGAgAaACTGg  
 >Fam\_644\_12\_2 Nr. of seq. 2 Alignment length(with gaps) = 12 Alignment score = 0.680556  
 CAgCAAGAgTTc  
 >Fam\_645\_12\_2 Nr. of seq. 2 Alignment length(with gaps) = 12 Alignment score = 0.722222  
 TcCTACCaGTTc  
 >Fam\_646\_12\_2 Nr. of seq. 2 Alignment length(with gaps) = 12 Alignment score = 0.722222  
 ACTTTTCTcCaAT  
 >Fam\_647\_12\_2 Nr. of seq. 2 Alignment length(with gaps) = 12 Alignment score = 0.611111  
 aCCGcGCAaGCT  
 >Fam\_648\_12\_2 Nr. of seq. 2 Alignment length(with gaps) = 12 Alignment score = 1.000000  
 CAGGCGTGTcCT  
 >Fam\_649\_12\_2 Nr. of seq. 2 Alignment length(with gaps) = 12 Alignment score = 0.666667  
 GAGcGCGAcGaC  
 >Fam\_650\_12\_2 Nr. of seq. 2 Alignment length(with gaps) = 12 Alignment score = 0.666667  
 CTCaaACTCAaA  
 >Fam\_651\_12\_2 Nr. of seq. 2 Alignment length(with gaps) = 12 Alignment score = 0.666667  
 TcTcTCTGgTTT  
 >Fam\_652\_12\_2 Nr. of seq. 2 Alignment length(with gaps) = 12 Alignment score = 0.666667  
 CCAGaaCCATCa  
 >Fam\_653\_12\_2 Nr. of seq. 2 Alignment length(with gaps) = 12 Alignment score = 0.777778  
 CCAACgCCaACA  
 >Fam\_654\_12\_2 Nr. of seq. 2 Alignment length(with gaps) = 12 Alignment score = 0.666667  
 acAACCaCAACC  
 >Fam\_655\_12\_2 Nr. of seq. 2 Alignment length(with gaps) = 12 Alignment score = 0.777778  
 ATCCTGAaAACA  
 >Fam\_656\_12\_2 Nr. of seq. 2 Alignment length(with gaps) = 12 Alignment score = 0.777778  
 ATAaTTTGTaTT  
 >Fam\_657\_12\_2 Nr. of seq. 2 Alignment length(with gaps) = 12 Alignment score = 0.777778  
 ATcAAAaAGGAG  
 >Fam\_658\_12\_2 Nr. of seq. 2 Alignment length(with gaps) = 12 Alignment score = 0.888889  
 TGTGAcGTTATT

>Fam\_659\_12\_2 Nr. of seq. 2 Alignment length(with gaps) = 12 Alignment score = 0.777778  
 CAGGTCAAaTCa  
 >Fam\_660\_12\_2 Nr. of seq. 2 Alignment length(with gaps) = 12 Alignment score = 0.666667  
 TgcCTCgGTTGG  
 >Fam\_661\_12\_2 Nr. of seq. 2 Alignment length(with gaps) = 12 Alignment score = 0.777778  
 CccTTTAAAAGT  
 >Fam\_662\_12\_2 Nr. of seq. 2 Alignment length(with gaps) = 12 Alignment score = 0.666667  
 ATcAAAgGAACc  
 >Fam\_663\_12\_2 Nr. of seq. 2 Alignment length(with gaps) = 12 Alignment score = 0.805556  
 GAtATTAaTACT  
 >Fam\_664\_11\_2 Nr. of seq. 2 Alignment length(with gaps) = 11 Alignment score = 0.696970  
 gTAAGCagAAA  
 >Fam\_665\_11\_2 Nr. of seq. 2 Alignment length(with gaps) = 11 Alignment score = 0.651515  
 ACAaTaTAAGg  
 >Fam\_666\_11\_2 Nr. of seq. 2 Alignment length(with gaps) = 11 Alignment score = 0.772727  
 GGAAcAATCAa  
 >Fam\_667\_11\_2 Nr. of seq. 2 Alignment length(with gaps) = 11 Alignment score = 0.772727  
 aAAGTAAAGGc  
 >Fam\_668\_11\_2 Nr. of seq. 2 Alignment length(with gaps) = 11 Alignment score = 0.636364  
 aCcTCGcTGCC  
 >Fam\_669\_11\_2 Nr. of seq. 2 Alignment length(with gaps) = 11 Alignment score = 0.636364  
 ATCgGGAcgGG  
 >Fam\_670\_11\_2 Nr. of seq. 2 Alignment length(with gaps) = 11 Alignment score = 0.757576  
 AaTTATCTAaG  
 >Fam\_671\_11\_2 Nr. of seq. 2 Alignment length(with gaps) = 11 Alignment score = 0.757576  
 AgAAGTcACTA  
 >Fam\_672\_11\_2 Nr. of seq. 2 Alignment length(with gaps) = 11 Alignment score = 0.878788  
 gAATTGTTGAA  
 >Fam\_673\_11\_2 Nr. of seq. 2 Alignment length(with gaps) = 11 Alignment score = 0.757576  
 TCAAaTATATa  
 >Fam\_674\_271\_1 Nr. of seq. 1 Alignment length(with gaps) = 271 Alignment score = 0.000000

GGAACCATCGACGCAAAAGGCATCTTCACGGCACTCACCGCAGAAGGATCAACCACAGTCACAGCCACTGCNNGGGACATCTCCGGGACAGGCTGAGGCGACNGTGAACCC  
 GGCTCCTCCAGTCATAACCAGCATTGCGGTATAGCCCTGCCAGCCCCAACCATTGATATAGGAGACACGCAAGCAGTTTACCGCCACCTGCTACGATCAGTATGACAATGA  
 GATGCCCCGANGTGACNNNTGTTTCCTGGTCAAGTGAGAATACAACAGTA

>Fam\_675\_264\_1 Nr. of seq. 1 Alignment length(with gaps) = 264 Alignment score = 0.000000

TGGGACTTTGATAACGATGGAAGTGTAGACAGTACTAAGCAGAATCCAGTCTACACTTATGCTGCATCTGGTAACTACACTGTCAATCTTACTGTTCCAATGCAGGTGGA

AGTGATTCTGAAGTCAAGACTGATTACATTGTCGTAAGTGAACCACTACCTGGAGTACCAGTTGCAAACCTTTACTGCAACGCCTACTTCTGGCGATGCACCACTTAGTGTG  
AACTTCACTGATGCTTCAACCGGCACTGTCTCCTCATATGCA

>Fam\_676\_258\_1 Nr. of seq. 1 Alignment length(with gaps) = 258 Alignment score = 0.000000

ATGTATTATCGTGACGGAACAACTACACTATCACATTGAAAAACACGAAAGGAACCACTAACTAATGCCGATGTAACATTCACAATCAATAATGAAAACTACACAAGA  
ACAATAATAAAAAATGGTATCGCATCCATTACAATCAACCTGCCGGAAGGAACATACACAATAAAAGCAACATATAAAAAACGCATCAACAACCAATAAAATTTATTGTTAA  
GACTACGAACCAGTAATCACTGGAAAAGATGTGGAA

>Fam\_677\_258\_1 Nr. of seq. 1 Alignment length(with gaps) = 258 Alignment score = 0.000000

TGCAGATTTTCGTTGGTTCCTCCAGTCTCAGGAAGTTCCCCATTAAAAGTGCAGTTTACTGACAAGAGTACAGGGTCCCCGACTTATTGGAAATGGAACCTTCGGAGATGGATC  
GGATCTGGTAACTGAATATAATCCAACACATACATACTCAAACCCGGAACGTATACTGTGAAAGAGACCGTGAGTAATGCAGCAGGTAAGGATACGGAAATAAAAAACGGA  
TTATATAACCGTGACAGAAGCTTCACAAACTCCTGA

>Fam\_678\_255\_1 Nr. of seq. 1 Alignment length(with gaps) = 255 Alignment score = 0.000000

TATGCCAGGGNGCNGCNGCAACATTCNCTGTTCAAGCANANAGCAGTGAGCCATTGAGCTATCAGTGGCTCAAAGATGGAATGAAGATNCCNGGTGCTACGTCTGATACGT  
ACACCATCCCTGCCGTAACCTNANCGATACGGGAAGCTACTCNGTNCAGGTGACAAATAANTGCAGCCAGATCGAATCGGAGGCTGCTGNTCTGGATATCATCGCNATGC  
CTGANATCCTGNCCCAACCGACCAGCCAGAAGG

>Fam\_679\_254\_1 Nr. of seq. 1 Alignment length(with gaps) = 254 Alignment score = 0.000000

GATGAAAACGGTACTGCNAGATTAAACATTTGGTTACATCCNGGCAGCTATATTATAACTGCTTANAATCCAANTAATAATGAAGCAANNNCAAACAATGTAACCTGTTTTA  
TCNACAATTAATGCAAAAAGATGTTACANTATANTACAAAATGGTACTCANTATTATGCAGTTGTTTTAGACGGTCAAGGTAATGCTTTAGCTAATCAGACTGTTAAATTNA  
ATATTAATGGTGTATTCTATACTAAAACACT

>Fam\_680\_254\_1 Nr. of seq. 1 Alignment length(with gaps) = 254 Alignment score = 0.000000

AATTCTTCCTGTAGCGAATTTCACTGCAAATCCGACAGAGGGTTTTGCTCCTCTCACTGTCCAGTTTAAACGACAGTTCTAAAAATGCAACTTCTGTAAGCTGGGACTTTGA  
CAATAATGGAGTTAGTGACTCCACAGAACGAATGATCCAATTTATGAGTTCACAGTTGCAGGACTCTATAACCGTTAATCTGACTGCAATCAATGTAAACGGTACGAATTCA  
ACGTCAGCTATAATCAACGTTACTGAGAAACC

>Fam\_681\_252\_1 Nr. of seq. 1 Alignment length(with gaps) = 252 Alignment score = 0.000000

CCATGCTGTCCGGTTGTTTTCACTTTTTGTCCTTGAATTGAACGGTAAGAGGAACCGGTCCTGTAGTTGTATTTGCTTCAAATCTGCTGTNGGTTCAACTATTGNATATGC  
CCGGATGTAAGAAAAGAGCTTCCGAGGTATCGGANCCGTACNCATTTTTTACTGTCAGCTCCACGGTATANTTTCTGCTGAGGAATATGTATGGGAAGGATTTTGTGTTTTGT  
TGAAGTAGTTCCGTTCTCCGAAGTTCCAGTT

>Fam\_682\_249\_1 Nr. of seq. 1 Alignment length(with gaps) = 249 Alignment score = 0.000000

TTCTGGTTTCTCTTTCTTGTCTTATCTGGCAGTAAAACCTGAGCACCAGGCTTGGTACCGGTTGTACCGTCATAATTCGGAGTGGCAAGAGTTGTACCTTCATCAGTGAT  
CTCCTGAGAACCAGGAGTAGTAACCTGGGCACCTTCTTCTCCTTATCTTCTCAGTCTCCTGAACAGGGATTATAGTCGACGTGGCCTCAGGACTAACAGTTACAAC  
TGGCTCGACATCCGAAGTCTTTTCAGA

>Fam\_683\_211\_1 Nr. of seq. 1 Alignment length(with gaps) = 211 Alignment score = 0.000000

GACCTCCAGAACGGTTTCATCGCAGGAGGGGGCGGAGGCCGCTGGCGTGGGAGTCCTGGCTGAAGGCNGNAGAAACNGGATCGCNAGCGAGTACCCTGGCGGCCGGAACCGG  
ATGGTATGGAACCGGCGCCTACGGCGGAGGCATNGAGGCNTCCAACAGGGAGGGTGCNGTTGNNGCNGCCGCGCCGCGGNGGCCTGGGCGCAANCNTC

>Fam\_684\_195\_1 Nr. of seq. 1 Alignment length(with gaps) = 195 Alignment score = 0.000000

ATGTTATCTGAAACATTTATCGTCTTGTACCGCTTGCATTGTAATTACCTGCATCGTCATAGAAGGTAGCGTTGAAGACAATGTCCTCCACTGAATCCATTGGGACATTC  
AGGGTATAGTTGTACCAGTTATCGTTCTTTGTGAGTTCAGCAGTATCGTTAGTTGAAATGTTGAACTCTGTACTAGTAATTCCA

>Fam\_685\_192\_1 Nr. of seq. 1 Alignment length(with gaps) = 192 Alignment score = 0.000000

TTGATCTTGGCGACAAAAGCGTCAAACGAACCGGCATTCGATGCCTGCAATGGATTTTTTGTGCGGAAGTTGGCGGAGNCTGTATACCCGGTGACATAGGCGTTGCCGCTC  
CCATCTACAGCGATGCCTTCGCCATAGTCATAGCCGCTTCCTCCCAGGTAGGTGGAATAAGACAGTGCCGACCCGGCGGAA

>Fam\_686\_176\_1 Nr. of seq. 1 Alignment length(with gaps) = 176 Alignment score = 0.000000

CTGTCGCCATCATCAGGGGTGAGTTTGGCCTGCTGACTCCAGGATCCGTCNTCGGCCTCGAACACGTACGCCGAGCCCGCCTCCTCGCCGTTGGAGGTCTTCGTCGACTGT  
GGGCNCCGATAATNGCAGTGGTCCCCTGACTCGACATTGCCACTGACNNGCCAAACAGTCTTCA

>Fam\_687\_159\_1 Nr. of seq. 1 Alignment length(with gaps) = 159 Alignment score = 0.000000

GTGTTCTCATAACCATATGCNNNACCACTNGAANCNCCTATTAGTAGGTCATAGTCTCCATCGCCGTCNAGGTCAGCTAAACATGGTGCTGCNNTACTTCCTATGTCAGGA  
GCATCCCATTC AATTTTTCTTGTCCACACTGGACTGCTTGGAGTCCCT

>Fam\_688\_156\_1 Nr. of seq. 1 Alignment length(with gaps) = 156 Alignment score = 0.000000

ATAGTAGACACGCGGATCTCCAACGTAAGTTATTGATGAAAGCNGACTTANAGNCAATGCTGGCTGTCCACCAGAATCTACAGTCACATCTCTGTTATGCCAGGTACTGTC  
AGAGCTATGCCATGCATATTCGTAGACATGATAATTATTGCCAAN

>Fam\_689\_156\_1 Nr. of seq. 1 Alignment length(with gaps) = 156 Alignment score = 0.000000

GATGCCTGGCTAATAAAGACNGANTCNAATGGCAANGAGCNNTGGAACAGAACCTTTGGAGGGNCNAANGACGATTGTGGCTANTCGGTACANGAGATNAANGATGGCGGC  
TATATCATTGCNGGTGNGACGAGNTCCTATGGNGCAGGNGGAANN

>Fam\_690\_154\_1 Nr. of seq. 1 Alignment length(with gaps) = 154 Alignment score = 0.000000

CCGTACGTCTCGTCGAGGTACTCGACGATGTCAGACCCACCTTTTCCTCCTCGGGTTCGGTCACTCCGTTCCCGAACCACTCGTCGCAAAACGTGGGCGAAAAGACCGCCC  
ACTCGCTTCGCTCGTGGACGAAGAGAACCCTTACGCTACGGTT

>Fam\_691\_154\_1 Nr. of seq. 1 Alignment length(with gaps) = 154 Alignment score = 0.000000

TCCAGACCTCCCGNCCCTTCGAGTCGGCCTTGAGGAGCCAGAGGTCCTTNCNCCGGCGCCGAAGGANTCGGTNCTGCCCCACGATGACGAAGCCNTCGGCCGTCTCCTGG  
ANCGAGNAGCCGNCATCGTCTCCGGGCCCCCCGAAGGTCCTGT

>Fam\_692\_154\_1 Nr. of seq. 1 Alignment length(with gaps) = 154 Alignment score = 0.000000

GTGAAGTGGCAAAAAACCTACGGAGGAGNATGGNNTGATNANGCCTNCGCGATTGCTCTGNTACTAACGAGNGANATCATTATNGCCGGANNAACNNATAGTTTCGGTGCN  
AGAAGGAGATGTNTGGGTTCTCAGGCTCGACGAGTATGGAAAT

>Fam\_693\_153\_1 Nr. of seq. 1 Alignment length(with gaps) = 153 Alignment score = 0.000000

TATGATGTAGCCNCCGTCGNCTGTCTGCTGGACCGAATNTCCCTCCTTGNCCNGCTCCTCCGAAGGTTCTGTCCCATACCCTGTATCCGGANGAGTCCGTCTTGATCAG  
CCAGAGGTCTTTNCCGCCNAAGTCGTCGAGGGTATAGCCTGT

>Fam\_694\_150\_1 Nr. of seq. 1 Alignment length(with gaps) = 150 Alignment score = 0.000000

TCGTAGAATAGGAGGTCCGGTGAATCCGTCNCCGTTGAANTCTCCGGGGACGATCGTCGACCATGTCTCCTCCATCCGCTGTGAGATTTTCAGGAGCCTGATGTTCCCGCTC  
CCGTCGGTGGCGTAGAACTCGCCCTGGCCTGCGGCGGGG

>Fam\_695\_149\_1 Nr. of seq. 1 Alignment length(with gaps) = 149 Alignment score = 0.000000

TCGACCGCCACACATCGTTCTGANAGGTGTTNCCGTCTAACCGCCCATGAGTACGATGCTNCCGTCCNGCATCGCGACACNGCTCTGTTCCGGNTCGTCCCGACCACCCGGA  
ACTCGGGTTCTGCTCTGTCCACGTTNTGCCGTTATCGG

>Fam\_696\_147\_1 Nr. of seq. 1 Alignment length(with gaps) = 147 Alignment score = 0.000000

CACAGCAGTGTGTTCTTCCCACGGCAGTATCGTGCTCATGGGCGGTNATGNTAGCAACGTTAAGAATGACACGTGGCGGTCAACTGATAACGGTGCAACCTGGACCGAG  
GTCAACTCAAGCGCCGGCTGGTCTGCAAGGTATTCT

>Fam\_697\_145\_1 Nr. of seq. 1 Alignment length(with gaps) = 145 Alignment score = 0.000000

TGGAGGGAAGTATGATCTTCGAGATGTTCTATAAAAAATGTCAAAATCGCCTACGAATCAACTGTATTCAGCATGTTTTACTGCTTCTAATTAAGCTGTAAGACAGGTG  
CATAACGGGAAACGACCAAATCCAGGAAAATAT

>Fam\_698\_142\_1 Nr. of seq. 1 Alignment length(with gaps) = 142 Alignment score = 0.000000

CAAAAAGCTCTAGAAATATATACAGTTAGATAAAATATCCACTTGACTATGCCATGGTTCAAATAATCTTGGAAATGCATATAGATGTTTAGCTGAGGTTAGAGATAAGGA  
AAAAAATGCTCAAAATGCTATTAATGCATAC

>Fam\_699\_141\_1 Nr. of seq. 1 Alignment length(with gaps) = 141 Alignment score = 0.000000

CCCAGTGGGGATCAGCAGGATCAGGAAACGGGCAGTTTAAACCAGCCCTAGGGGATCGCCATCAACACGACCGGGTATGTCTACGTGACAGACTAGGACAACAACCGGATCC  
AGGTATTTGATCCGAGCGGAAACTATGTTA

>Fam\_700\_141\_1 Nr. of seq. 1 Alignment length(with gaps) = 141 Alignment score = 0.000000

TTCCAGGCAATGTATAGACTATTGTTATGTACACAAAGAGCCGGGATTCAGGACTTGTCTCAGAAGAAGTGTATTTGTTCCCAAAGGTCATTCCGTTGTCCGCCGAGTAC  
ATCACATTCAAATGTTGTTGCCGTCGCCT

>Fam\_701\_141\_1 Nr. of seq. 1 Alignment length(with gaps) = 141 Alignment score = 0.000000



AAGGTTACAGCCACGGTAAAAGTAGGAAATCGTCCTTATGGAATTGCAGTAAGTCCTAATGGAAAAAAGGTATATGTTACAACTCAGGTACCTATAATGATCCGGGAAAT  
ACTGTCTCTGTAATTGACACAGCAACAAAC

>Fam\_702\_141\_1 Nr. of seq. 1 Alignment length(with gaps) = 141 Alignment score = 0.000000

TAACTGATCCGGGGTTGCCGGCGCTGTCCAGCGCCAGGGANGTGTACCACCCGACANACCCCTCTGAATCCACCGTTTCATTGTGCCAGCCGAGTCATCGTGCCACGCA  
TACTTCAGGTCGTTATTCGTNTNATCGAAG

>Fam\_703\_138\_1 Nr. of seq. 1 Alignment length(with gaps) = 138 Alignment score = 0.000000

GCATCGTTGTTGTAATCCAGATACCAACCCCGATTAGAAGGCCTGAAAACACCTATTGTGTCCTTACCATCACCATTCCAATCGCCTGCAACTGCCAGGTCACCATTCAAG  
CCGTACACAATGATAAAGTCAGGAACA

>Fam\_704\_137\_1 Nr. of seq. 1 Alignment length(with gaps) = 137 Alignment score = 0.000000

TTTTCCAATTTCTGATGGTAACTGTNNTAGATTATTATGACAAAGNAAAGTTTTATAAGNTTNTAAGTTCCCAATTTCTGGAGGTAGTAGAGTCAATTGATTNCTAGAT  
AAGTCAAGTTCTCTAAGGTTCTTAAG

>Fam\_705\_133\_1 Nr. of seq. 1 Alignment length(with gaps) = 133 Alignment score = 0.000000

CGGTGTCCTTTTCGCTCGCTTTGCTCTCTCAAGAGGACTAATTGACATATTTATGAATCAGCCGTGAATCAAACGTGGAAGGCATCGAGTACAAACCCACATGCTCTCCAT  
CCCGAGTTCCTTCTCGGGAGGA

>Fam\_706\_129\_1 Nr. of seq. 1 Alignment length(with gaps) = 129 Alignment score = 0.000000

TGCTGATCCACTGGTTGTAATTTGAGTTTCTACGGAGGTGGACAAATTGTACATGTAGANCTCAGATTGATTCCATCCGTTGCGATTATCCTTCCACACGATTTTATCCCC  
GTAAATTGCAGGATAATC

>Fam\_707\_126\_1 Nr. of seq. 1 Alignment length(with gaps) = 126 Alignment score = 0.000000

AATCTTGCAGGACTTTACNCNAAAATAGGAAGATATGAAGAAGCTNTACNTCTTTATAATCGTGCTTTAGAGATCNATAAAAAATTNTTTGGAGAGGAACATCCCTATATT  
GCNATNACTCTAAAC

>Fam\_708\_126\_1 Nr. of seq. 1 Alignment length(with gaps) = 126 Alignment score = 0.000000

CCAGGGCAAATATTCTGATGCCGAACCACTTTACACTCGTGCCCTGGAAATCCACGAGAAGTTTTGGGGTCAGAACACCCTTACGTAGCAACTTCTCTTAATAATTTAGC  
AGGACTCTACGTACA

>Fam\_709\_126\_1 Nr. of seq. 1 Alignment length(with gaps) = 126 Alignment score = 0.000000

AATAATCTAGCGGAACTATATAGAAATTCAGGCAGATATTCTGAAGCTGAACCTCTGTATACCCGTGCCTTGGAAATTACAGAAAGAGCACTGGGACCGGAACATCCAGAT  
GTAGGCACTCGTCTT

>Fam\_710\_126\_1 Nr. of seq. 1 Alignment length(with gaps) = 126 Alignment score = 0.000000

CCTAGCGATTTGCGCCAAATTTCTGTTGCCTGGCGGAAAAGCGGCTCAGCATCGCTGTATCTGCCCATCGAATCGTACAGCNATGCGAGGTTGTTTCAGGCTNGNGGCGTAG  
TCGGGATGATCTTCG

>Fam\_711\_126\_1 Nr. of seq. 1 Alignment length(with gaps) = 126 Alignment score = 0.000000

ACGTATATGTATCCATTACTAGGATCATANAANATACTCNATGGATCTTGTCTNATNGATATATTAGCTATNACANTGTTNGTAGTAGAATTAATTACAGAACTGTATTA  
GACCTAGAATCTGCA

>Fam\_712\_122\_1 Nr. of seq. 1 Alignment length(with gaps) = 122 Alignment score = 0.000000

AATTGCTTTTTTTAGATTCNCCCTTTGTAAATGAATGCTAGACCTATATTNCCGATNCGAATTCCTTCACTTNACCATATTGTTTATNTCCTTTGAAATTTTCAAAGCTTGT  
TCATAATATTC

>Fam\_713\_121\_1 Nr. of seq. 1 Alignment length(with gaps) = 121 Alignment score = 0.000000

CCTTCCAATGGTTACGTGTATGTAACGAACTTACATTCAAATNACAGTCTCTGTTATCTCAGGTAATAATGTTGTAGCTAACGTCCCTGTTGGTGTGGCCCGANCTATGC  
TCTTTACGAC

>Fam\_714\_120\_1 Nr. of seq. 1 Alignment length(with gaps) = 120 Alignment score = 0.000000

TATGATCCTGAGAAATGGGTATATGTATGTTACAAACTTTGGTTCTAATACAGTTTCTGTAATCTCTAATACATCAGTAATTGAAAATATTAATGTTGGGAATGGACCTATA  
GGTATTGCT

>Fam\_715\_120\_1 Nr. of seq. 1 Alignment length(with gaps) = 120 Alignment score = 0.000000

TAAATCCTGACGGAACAGAAAAATGGAGATTTAATACGGGAAAGTCGATTGATTCAACTCCNGCNATTGNAAAAGATGGTACAATCTATTTTGGTTCANATGATGGTAATT  
TATATGCCA

>Fam\_716\_120\_1 Nr. of seq. 1 Alignment length(with gaps) = 120 Alignment score = 0.000000

TGTATGCGATCGATGCCGNACNGGAAAAGAGAAGTGGCGGTTTCGCTACGGNAGATNGNGTGGTTTCATCTCCNGCNGTAGCGAACGGNATTGTCTATGTCGGGAGTGAGG  
ATAANAACC

>Fam\_717\_120\_1 Nr. of seq. 1 Alignment length(with gaps) = 120 Alignment score = 0.000000

AATATTATGAGCAGGCTCTTTTAATTTCTCGAGAAATTTGGTGATCGACGCGGAGAAGGAANNCATCTTGGCAACCTTGGTAGTTCCTACNTCCATCTTGGTGAAGTTACTA  
AAGCTATCG

>Fam\_718\_120\_1 Nr. of seq. 1 Alignment length(with gaps) = 120 Alignment score = 0.000000

CTCGATGATTCNAAATTTTCAGTCAATTATCTGAACAGTTTGGGAAGCATTCTTCAGAAACAGGGTAGATTGAGGGAAGCAGAACTACTTTTCAAGAGAGCTTGCATATA  
GCGAAAAAA

>Fam\_719\_120\_1 Nr. of seq. 1 Alignment length(with gaps) = 120 Alignment score = 0.000000

TCCATTTGAGGGTGCCGTTGGCGTTGAGCGCATAGAGACTGTTATCNTAACTCCCNGCGTACACGGTCCCGTCCGAAGCGATCGCAGGGGAGCTATAAAATGCGTCCACCGG  
TAGCGTACG

>Fam\_720\_120\_1 Nr. of seq. 1 Alignment length(with gaps) = 120 Alignment score = 0.000000

CACCGTCTTCGTCTGGGAGCAACGACGCCAATCTGTACGCCGTAGACGCCGAAACGGGTACCGAACAGTGGCGTTTCGAAACCGACGACCGGGTCCANTCGTCGCCGACAGT  
GGCCGACGG

>Fam\_721\_117\_1 Nr. of seq. 1 Alignment length(with gaps) = 117 Alignment score = 0.000000

CTAAATCCTATGTTTCTAATGGTAAGGTTGCTTTCAAAGTTAATGATAAACTGTTGGTTATGGTAGTGTTCCTAATGGTAAGGCTTATTATACTTATGATTCTAGTAAGT  
TATCTG

>Fam\_722\_117\_1 Nr. of seq. 1 Alignment length(with gaps) = 117 Alignment score = 0.000000

AATTCCCAAATCTCCCTACCAGTTTTTAAATCCAAGGCGTAGGTGTATCCTNCANNACATCCCAATACAACAATATCGTCTTTTTATGGATATTNCCNATACACTCTCAGCA  
GCCTTA

>Fam\_723\_113\_1 Nr. of seq. 1 Alignment length(with gaps) = 113 Alignment score = 0.000000

GCGTGACAAAAACGACACGGTAAAGCGAATACGGTGTACTGGTCTACATATTATTCAGTAGTCCTCTTGAGCGCAGCGAAAAGGACCTCGTGCTCCCGAAGCGAAACTC  
GG

>Fam\_724\_109\_1 Nr. of seq. 1 Alignment length(with gaps) = 109 Alignment score = 0.000000

TTATCTGGCAGCTCAGAAAATACAGCCATAAGAACTTTAGCGGCCACGTTCTCACTTCATCGNTCTTGATCAGTGAGAAGTCTAATTAAGTCATGTATGCCTGTTGC

>Fam\_725\_108\_1 Nr. of seq. 1 Alignment length(with gaps) = 108 Alignment score = 0.000000

GCTTTATCGTATTCCTTCTTTTAANNGATAACAGAAACCCANATTGTTATTTATCTGCCATTTTCTTTATCGGGGCTGATTTCCAGTGCTTTCTTATAATATTTAATG

>Fam\_726\_108\_1 Nr. of seq. 1 Alignment length(with gaps) = 108 Alignment score = 0.000000

TTTTCAATATGTACCGGANAAAAATCAGGCATGGGAAGANTTAGTTAGATTGACNTCAGATAAAGANAGTGATNTACGTTGGANAGTAGCAGAGGCNNTTGAANTGT

>Fam\_727\_105\_1 Nr. of seq. 1 Alignment length(with gaps) = 105 Alignment score = 0.000000

AAGCAGAAGAATTTTACAGAAAAGCTCTGGAAATFGANCCAGANNACGCTAATAACCTTGGAATTATGCAAATTCCTNNANNATATTCGNAAGATTACAATA

>Fam\_728\_103\_1 Nr. of seq. 1 Alignment length(with gaps) = 103 Alignment score = 0.000000

CAAGCTTATAATGTTTTTCAGCTTCTTCCATACGTCCCATTCCGCTNCAGGAAAAGTCCGTAATTTAANTGTATGGATAACAATTTTGGATCGATTTTCAAAG

>Fam\_729\_102\_1 Nr. of seq. 1 Alignment length(with gaps) = 102 Alignment score = 0.000000

CTTTTTCATATCTCTCTAATTTATATAACGAATCTGCTTTATAATACCAAGCGGCTGGATTATTTGGATCGAGTTTTATTGCTTTATCAAAACATTTCTATCG

>Fam\_730\_102\_1 Nr. of seq. 1 Alignment length(with gaps) = 102 Alignment score = 0.000000

TCTATCGCTTCATTTGTACCTTTCAAGATTACAAAGTGCATCGCCCTTGTTATTNCAATATGAACTAAAATCTGGATCTATCTCAATTGCTTTATCATAGCAC

>Fam\_731\_102\_1 Nr. of seq. 1 Alignment length(with gaps) = 102 Alignment score = 0.000000

ATTGCTTCTTCGTATCTTCCAAGCTACTAAGTGCCAAACCCTTGCTATCCCATGNACTATCAGACNTTGGGTTTATTTCTATGGCTTTATCATATGCCTGT

>Fam\_732\_102\_1 Nr. of seq. 1 Alignment length(with gaps) = 102 Alignment score = 0.000000

GACCGCTCCGAGAGCCCGCCAGGTCCCNGAGGGCGACCCCTTGTTGTTCCAGGCGTGGGGGTANNCGGGGTTCGAGGCTCAANGCCATATCGTANGCCTC

>Fam\_733\_102\_1 Nr. of seq. 1 Alignment length(with gaps) = 102 Alignment score = 0.000000

TCAGGATTCAGCCTCATAACCTCATCAAAAGCCTGGATGGCCTCGTCGTACCTGCCCAGTGAATCGAGAGCNGCACCTTTGCTGTTCCAAGCATCGACATAC  
>Fam\_734\_102\_1 Nr. of seq. 1 Alignment length(with gaps) = 102 Alignment score = 0.000000  
AAAGCGCAAACCTCATCGTCAGGATTTAGTTCCAAAACCTTATTAATAAACTCAACAGCTTCCTCATATCTATCTAATAAACTAAAGAAGATCCTTTGTTAG  
>Fam\_735\_102\_1 Nr. of seq. 1 Alignment length(with gaps) = 102 Alignment score = 0.000000  
TCAATTGCTTTATCAAAGGCTTTTACTGCTTCCTCGTAATTGCCTAAACACTCAAGAGAATATCCTTTATTGTACCATGCATCTGAATTTTGAGAGTTAATT  
>Fam\_736\_102\_1 Nr. of seq. 1 Alignment length(with gaps) = 102 Alignment score = 0.000000  
ATGGCCTCATCGTATTTGCCTAGGGCCNNGAGCGCANTGCCTTTGTTGGACCAGGCNTAGGCATACTGNGGATCNATGCTGATAGCCTGATCGNAAGCCTTG  
>Fam\_737\_99\_1 Nr. of seq. 1 Alignment length(with gaps) = 99 Alignment score = 0.000000  
GTTTAGTTGGTTATAATCACGGTTATTATGGTGGTNATTTGACAATCACAAACAGCTATGCTACAGGAAATGTAACAAGTTATGGCGACCGTGCAGGTG  
>Fam\_738\_99\_1 Nr. of seq. 1 Alignment length(with gaps) = 99 Alignment score = 0.000000  
TTAATATTCAGGATGAAAACGGCGANACNGCTTTGATTTCTGCGGCAAANGNGGAAANAGGAACATTGTTGAGTTGCTTATTAATAAGTGGTGCCGANC  
>Fam\_739\_98\_1 Nr. of seq. 1 Alignment length(with gaps) = 98 Alignment score = 0.000000  
AAAAATAGCGAGGAGAAGTTCCAAACGAAAGGGCTACGCCCTTTCAACCCTAGCGGGATAACAAGTTATCCCCTGGTAAAGTTTTAAGTTTTACAA  
>Fam\_740\_87\_1 Nr. of seq. 1 Alignment length(with gaps) = 87 Alignment score = 0.000000  
GACAACCACAATCCGGATCAGAACAAGAATCCTCATCCTCATGCCCATGATGATGCTCATGCTCGTGCCCATGGCCATGCTCATCAT  
>Fam\_741\_86\_1 Nr. of seq. 1 Alignment length(with gaps) = 86 Alignment score = 0.000000  
AGATGATTCCCGGAACCGCGTTACTCGAAAACGCTTCGCGTTTTCTCGAACTCCTGCCGGTCGCTCCGCTCCCGCCAGTCGTGGA  
>Fam\_742\_84\_1 Nr. of seq. 1 Alignment length(with gaps) = 84 Alignment score = 0.000000  
CTACAACAGGAGGAACTTCAGAAGTTCATCTGATGCATCATCAACAGAAGATGTGATTTCAACAGATTCTCTGACACATCAT  
>Fam\_743\_84\_1 Nr. of seq. 1 Alignment length(with gaps) = 84 Alignment score = 0.000000  
ACCAACAAGGCCACCTACATAATCTCCAGTTCCGGTCACATCACCTGTGGAATATGAATCTGTAATAGTACCNCNATAATTTAT  
>Fam\_744\_84\_1 Nr. of seq. 1 Alignment length(with gaps) = 84 Alignment score = 0.000000  
ACTTGATCGGTTAAACAAGGCGATAGAACTCGTNAATACCGAACTGGACCGGTTAATAAGACACCGCAATTGATAGATACGGA  
>Fam\_745\_84\_1 Nr. of seq. 1 Alignment length(with gaps) = 84 Alignment score = 0.000000  
TGATGAGAGAATAACTAAATTGGAGGAGTCTACGAAGAAGTTGGAGCAAGCTGTACAAGAGCTTATTGAGGCTCAGAAAAACA  
>Fam\_746\_79\_1 Nr. of seq. 1 Alignment length(with gaps) = 79 Alignment score = 0.000000  
TTGTTTATTATCTCTCCACTNCTCTACTNNTATGNTGATGGCNCCTCCTCNGTAGGATGCGNTGTTGTTTTTGAATGTG  
>Fam\_747\_78\_1 Nr. of seq. 1 Alignment length(with gaps) = 78 Alignment score = 0.000000  
TTACAGCTTCAAGACGAACANTCNAATCAGNATCATTTTTAGCAANATNNNCTAAAACAGANTNATCATTTATCTTCC  
>Fam\_748\_78\_1 Nr. of seq. 1 Alignment length(with gaps) = 78 Alignment score = 0.000000  
AAGAAAATGACTCAACGAGTTCAAAAATAATGTATCTAACGGGTATAAACTAATAACAGTAAATAAAACAGTCGCTC  
>Fam\_749\_75\_1 Nr. of seq. 1 Alignment length(with gaps) = 75 Alignment score = 0.000000  
CCACAGTCAAACCTACCACATTGCAGATAGCACCACCTAACATCGGCTTTATTACCCGTGAATGTACTATTAC  
>Fam\_750\_75\_1 Nr. of seq. 1 Alignment length(with gaps) = 75 Alignment score = 0.000000  
GGTGAACGTACACGAACGCTGCGCTGTACCGGCTATCACATTACTATGATACTCTCAAACCTGTTATCTCTGTGGA  
>Fam\_751\_75\_1 Nr. of seq. 1 Alignment length(with gaps) = 75 Alignment score = 0.000000  
CCGCTCGTGCCGCAACCGGTTTCGACTCGCTCAGGCCCGCCCTTCGCTTCGTCGAAGTCACAGCGTCACGTCACT  
>Fam\_752\_73\_1 Nr. of seq. 1 Alignment length(with gaps) = 73 Alignment score = 0.000000

CCCCGCGAGTCCACTCCTCTCACTTCGTTTCGAGTTGTTTCCTCGCTTGCCCCGCTCGCTTCGCTCGCGGGGA  
>Fam\_753\_73\_1 Nr. of seq. 1 Alignment length(with gaps) = 73 Alignment score = 0.000000  
ATAGCTCCACCNACTGTTGCGGTGTTGTTGTNGAATGTACTGTTAGTTACAATTAAGTTCCATNATTCGCTN  
>Fam\_754\_73\_1 Nr. of seq. 1 Alignment length(with gaps) = 73 Alignment score = 0.000000  
ATTCGAGAGCAAGATCCACTAAAACAAGGATTGAAACCNGTAATCATGACTNNTGANATTTAANCNTAACATT  
>Fam\_755\_72\_1 Nr. of seq. 1 Alignment length(with gaps) = 72 Alignment score = 0.000000  
TGAAATTGTTGAAAATCCGGAAAATAACACTTCCAATCAAACAGCTGCTGAAAACCTGACAGTTCGGAAAC  
>Fam\_756\_71\_1 Nr. of seq. 1 Alignment length(with gaps) = 71 Alignment score = 0.000000  
CCCCTCGCCCTTTCGCGGCCCGCTGCTCGCTTCGCTCCCAGCGCGCCGCGCTACTCACGGATCGTTCCCTC  
>Fam\_757\_71\_1 Nr. of seq. 1 Alignment length(with gaps) = 71 Alignment score = 0.000000  
GCGGGCGACGCCATGTCGCTCGCTCGGAGACTATGCCGTGGCTGTGTGTAGCCGAACGTGGCACACGACCA  
>Fam\_758\_71\_1 Nr. of seq. 1 Alignment length(with gaps) = 71 Alignment score = 0.000000  
TTTTAGTAGATTAGCTTTTGCAATACANTAGANTAAACATNNNAAATGAGNGNANAATGTCGCAATCCTTG  
>Fam\_759\_71\_1 Nr. of seq. 1 Alignment length(with gaps) = 71 Alignment score = 0.000000  
TTCAATCCTTGTTCGTTGAGTCTACTTCTCGACATTANAATGACTTANATGGTANGAGANATACGNGT  
>Fam\_760\_69\_1 Nr. of seq. 1 Alignment length(with gaps) = 69 Alignment score = 0.000000  
CTCGACGACGGTTCGGAAGTCGACGAGCTCGGGACGGATCCAGTGGTCCGACACGGACGATGACGGT  
>Fam\_761\_69\_1 Nr. of seq. 1 Alignment length(with gaps) = 69 Alignment score = 0.000000  
TTTGCGAATATGAAGTTGTNTTCGATTTTCGGTGAAGTCAGATCCGTATACGCTTATTCGTCATCTTCG  
>Fam\_762\_69\_1 Nr. of seq. 1 Alignment length(with gaps) = 69 Alignment score = 0.000000  
CAGCAGAAAATAAATTTGAANANGCAACAAAATATGCAGTGTGGCATTGGGTCAAATTGGGGAAAAG  
>Fam\_763\_69\_1 Nr. of seq. 1 Alignment length(with gaps) = 69 Alignment score = 0.000000  
GGTCACGGATGCGAGCGATGAACAATCGTNGAACGCANNNTCCCCGATGGATGTTACCGAGTCGGGGAT  
>Fam\_764\_69\_1 Nr. of seq. 1 Alignment length(with gaps) = 69 Alignment score = 0.000000  
GAACTTAAAAACCTTACAACACTTGACTTATCTAGGAACCAGCTGACACAATTGCCACCNGAAATTGCA  
>Fam\_765\_69\_1 Nr. of seq. 1 Alignment length(with gaps) = 69 Alignment score = 0.000000  
CGATGCTGGTGACNCTGTTCCGNATGGTCACCGAGGTCAGGGCGGTGCAGCCGTAGAACGCACNGNNGC  
>Fam\_766\_69\_1 Nr. of seq. 1 Alignment length(with gaps) = 69 Alignment score = 0.000000  
ATGACGGCAATCCTTGCACTGCCGACTCCTGTGTGAATGGAGAATGCTACCATAGGCCGAAAGAACTGCA  
>Fam\_767\_68\_1 Nr. of seq. 1 Alignment length(with gaps) = 68 Alignment score = 0.000000  
ATCTTAGTCTGATTTTAACGGCGNGCANCGAGNTCAAGATCGTCAAGGNAGGAGANGCTTTCAATCCT  
>Fam\_768\_68\_1 Nr. of seq. 1 Alignment length(with gaps) = 68 Alignment score = 0.000000  
CCCTCGCTTCGCTCGGCATGCCCTTCGCTGCTCGCGTGTGCTACGCTCCCCTCGCAAAAACGAGAC  
>Fam\_769\_68\_1 Nr. of seq. 1 Alignment length(with gaps) = 68 Alignment score = 0.000000  
AAAATAACGCCCTAAGGGGATGGAACATNATCTCNCNTCTTCAACATNCAANNGTGTATTNC  
>Fam\_770\_68\_1 Nr. of seq. 1 Alignment length(with gaps) = 68 Alignment score = 0.000000  
TTATTCCAGAATCNGTTAAGTAGTATCGGAGAATNATGCTTTTTAAAAATAATAAATTAACAGGCATAA  
>Fam\_771\_68\_1 Nr. of seq. 1 Alignment length(with gaps) = 68 Alignment score = 0.000000

AGGATGCGACTGCCGGAACGGCAGGAGCTCGAGAAGATGCGAAGCATCTTCGAATGGCGACTGTCCGT  
>Fam\_772\_68\_1 Nr. of seq. 1 Alignment length(with gaps) = 68 Alignment score = 0.000000  
ATGGAGCAAATTAAGGACGGCTTGAAAACCGATCCAGAAATCTACTTCNTTGACGCGTAAGCTGCAAG  
>Fam\_773\_68\_1 Nr. of seq. 1 Alignment length(with gaps) = 68 Alignment score = 0.000000  
GTCTTATTGCAACATNTCGTCANACAGCAGAACCTNCAACTAGACCGTNCGGTTTCAATTCTCCTCGA  
>Fam\_774\_68\_1 Nr. of seq. 1 Alignment length(with gaps) = 68 Alignment score = 0.000000  
AGAAGAATTGAAATAATTGACCTTTTAGAGGACTATGGCATAAGTAAGGTAGTTCAATAAGACTTT  
>Fam\_775\_67\_1 Nr. of seq. 1 Alignment length(with gaps) = 67 Alignment score = 0.000000  
GTTCAATTCAAACCTTGTTATAGTGGATGTTGCCAAGCAACTGATAGATATTTTGTTAAATGAAATA  
>Fam\_776\_67\_1 Nr. of seq. 1 Alignment length(with gaps) = 67 Alignment score = 0.000000  
CTTTCAATTCTATTTTAGTCTTATTGGAACNNTNANNGATNCACNTGCTCNNAANNAGCNNNTNANN  
>Fam\_777\_67\_1 Nr. of seq. 1 Alignment length(with gaps) = 67 Alignment score = 0.000000  
CTCTTAGAGTCTTATTGAAACCANTACTCTGTNNANATGANCTNNTGAANCTTCANTNCTTTCAATT  
>Fam\_778\_66\_1 Nr. of seq. 1 Alignment length(with gaps) = 66 Alignment score = 0.000000  
ACCACATGGTACTTCTTCTACTGATNTGAAAANGANATANGNTAAAGTGANAGAAATNGTTTCCAC  
>Fam\_779\_66\_1 Nr. of seq. 1 Alignment length(with gaps) = 66 Alignment score = 0.000000  
CGTCAGTGTGTCNGCGNCTGTGCGGTTTCGTGCCNATGGACAGCTCNCGCCCGTCGGNNACCCCGTCGN  
>Fam\_780\_66\_1 Nr. of seq. 1 Alignment length(with gaps) = 66 Alignment score = 0.000000  
GTTAAATAAGACCGTCTCGGTATCTAATACAAAAANTNCTCATAGCTTNGATTNCGTCTTTAATT  
>Fam\_781\_66\_1 Nr. of seq. 1 Alignment length(with gaps) = 66 Alignment score = 0.000000  
GGAATAACCAAACCTTCAACTGGTTATNTGAAAAAGCACCTCTNCCAATACTAGTTACNGAATCT  
>Fam\_782\_66\_1 Nr. of seq. 1 Alignment length(with gaps) = 66 Alignment score = 0.000000  
AACCAGATCAGCGATCTGAGCCCCCTCGCCGACTGACCAACCTGGNGTATTTTCTAGATATATCC  
>Fam\_783\_66\_1 Nr. of seq. 1 Alignment length(with gaps) = 66 Alignment score = 0.000000  
GAGAATGCTGACGTTATTGATTCTGACGCTACTAATGATGATTTAAACGGAAATTTCTGATTTAAAT  
>Fam\_784\_65\_1 Nr. of seq. 1 Alignment length(with gaps) = 65 Alignment score = 0.000000  
TCTACTATAGAATTGAAAGAAAGTTNNNAGAAGANTTTAATTACCATTCCGCNTGATGACGATAA  
>Fam\_785\_65\_1 Nr. of seq. 1 Alignment length(with gaps) = 65 Alignment score = 0.000000  
CCACAAGGGTTCGTCTGTAACACTACGGTGAGGACGTGNACCGATNNCGTNCGACGNTGCTTCAACC  
>Fam\_786\_65\_1 Nr. of seq. 1 Alignment length(with gaps) = 65 Alignment score = 0.000000  
TCTGATTCTAACNNTTAANNTNNTNANNANNTNANNTNNTAANNNAATTTCAATCCTAAAATAG  
>Fam\_787\_65\_1 Nr. of seq. 1 Alignment length(with gaps) = 65 Alignment score = 0.000000  
CTTTCAATCCTATTTAGGTTATTATTTAACNNNATNGGATTTCNNNNCCNTATCGAGATACTATA  
>Fam\_788\_64\_1 Nr. of seq. 1 Alignment length(with gaps) = 64 Alignment score = 0.000000  
GTTGCATCCAAAAGGGATTGAAAGNAGATTNAGANNAGTAGTANCTGNNCTTNAATGTCGGTTN  
>Fam\_789\_64\_1 Nr. of seq. 1 Alignment length(with gaps) = 64 Alignment score = 0.000000  
TTAAAATCAGACCTTAGAGGGATTGAAACNNANANNTNAANNTTNNAGNNNTGNACATNATNG  
>Fam\_790\_64\_1 Nr. of seq. 1 Alignment length(with gaps) = 64 Alignment score = 0.000000

TCCGGAATCTTCAGCTCGTGACACACTCTTTAAAAAAAATCCTCAGCAGCTGAGTGACCGATTT  
>Fam\_791\_64\_1 Nr. of seq. 1 Alignment length(with gaps) = 64 Alignment score = 0.000000  
CAATAAGACTCTAGGAGAATTGAAAATNATCANTGACGTNCTCAANGCNAGCTNANGCNGTTG  
>Fam\_792\_63\_1 Nr. of seq. 1 Alignment length(with gaps) = 63 Alignment score = 0.000000  
GAGGCACAGAAGAGAAGCGAGGAGAGACTAACTAGACTCGAGTCCGCGGTTGAGAACTAGCC  
>Fam\_793\_63\_1 Nr. of seq. 1 Alignment length(with gaps) = 63 Alignment score = 0.000000  
ACTAAAATCAGACCATTTTGGGATTGAACTNANTNANANNATNTNNAGNNNNNTNNATTNANN  
>Fam\_794\_63\_1 Nr. of seq. 1 Alignment length(with gaps) = 63 Alignment score = 0.000000  
TTTTTCGACCGGCGACTGGTGTTCGACAAGCGCCCAGCAGGAGCTGGAGAAAAATGCGCAGCA  
>Fam\_795\_63\_1 Nr. of seq. 1 Alignment length(with gaps) = 63 Alignment score = 0.000000  
TCTTATTGCAACGNACAGCACACTCAGGGGGNATCAGGCCCTCTCTTTCAATTCTCTTAGAG  
>Fam\_796\_63\_1 Nr. of seq. 1 Alignment length(with gaps) = 63 Alignment score = 0.000000  
GTTTGAGAGTGTGTCAAATACGAGGTAACCTCAATCANTATNGGCCGGNNTANNCAGNCTTC  
>Fam\_797\_62\_1 Nr. of seq. 1 Alignment length(with gaps) = 62 Alignment score = 0.000000  
CTAACAAAAGTAGCACAAACTTCTTTGATCAACCTTCTGTCTAAGAAAGGTTGGCTTACAG  
>Fam\_798\_61\_1 Nr. of seq. 1 Alignment length(with gaps) = 61 Alignment score = 0.000000  
TAAAAAGAAATAGTGTTTTTTAGTTAAATAAGGTGAAAATTGTTATTTTTAATTAATAAAGT  
>Fam\_799\_61\_1 Nr. of seq. 1 Alignment length(with gaps) = 61 Alignment score = 0.000000  
GTTCAACCCACGCTGTGGGACTTTNTCNNNNNGNANNNGNNTNNNCTGNNNCNTNCG  
>Fam\_800\_61\_1 Nr. of seq. 1 Alignment length(with gaps) = 61 Alignment score = 0.000000  
GAAGCCCCCTTCAGTCACTAGATTTAGAAAGATGTGGTGTTTAACCATCCATTATCTCAA  
>Fam\_801\_61\_1 Nr. of seq. 1 Alignment length(with gaps) = 61 Alignment score = 0.000000  
TTCATCCCCACGTGTGTGGGAACTCNANTANNNTCANANNTNTCNNNANNNTNAANCGG  
>Fam\_802\_61\_1 Nr. of seq. 1 Alignment length(with gaps) = 61 Alignment score = 0.000000  
AACTCTGAAATATATTTTCGCTCACGCTTTTTGATCAAACCTTTTTGGAAAAAGTTTGTGA  
>Fam\_803\_60\_1 Nr. of seq. 1 Alignment length(with gaps) = 60 Alignment score = 0.000000  
TTTTTAATGTTTGATTTGTTTTTGTAATTTATTTATTTTTTTCTTCTTTTCTTTTCAT  
>Fam\_804\_60\_1 Nr. of seq. 1 Alignment length(with gaps) = 60 Alignment score = 0.000000  
CCTCCAGGCCTACTCGATCGGTTCCGGGAGCCCGTATCAGTACACATCGGAGTCCAGCGG  
>Fam\_805\_60\_1 Nr. of seq. 1 Alignment length(with gaps) = 60 Alignment score = 0.000000  
TGTGGGGAACCTCNNANTTCNCNTANCANNTTACNNNNANNANCGGTTTCATCCCCACGCC  
>Fam\_806\_60\_1 Nr. of seq. 1 Alignment length(with gaps) = 60 Alignment score = 0.000000  
CAGGGCGACAGGCCCTACAAGCCCCGGAAGGAGCAGCACCCACATCCGGCGACCGCCCC  
>Fam\_807\_59\_1 Nr. of seq. 1 Alignment length(with gaps) = 59 Alignment score = 0.000000  
AAATTGACCAAATAGACGTTAATTTGATCAATAGATGTAAATCGATCAAATAAATTTGTT  
>Fam\_808\_59\_1 Nr. of seq. 1 Alignment length(with gaps) = 59 Alignment score = 0.000000  
TCACCTCGTGACGGTTCGTGTGCCCGGACGCCCTCGGCGGCCAGACGTTACGAAGCG  
>Fam\_809\_58\_1 Nr. of seq. 1 Alignment length(with gaps) = 58 Alignment score = 0.000000

GAGTTCCCCATGCATGTGGGGATAAACCGNNNATNNCATNNNANCNNNCNNANNNNTN

>Fam\_810\_58\_1 Nr. of seq. 1 Alignment length(with gaps) = 58 Alignment score = 0.000000  
TGGGGATGAACCGNNGANNNGACATGACATCCGNGNCNCANNAGTTCACCCACGCATG

>Fam\_811\_58\_1 Nr. of seq. 1 Alignment length(with gaps) = 58 Alignment score = 0.000000  
TGTGGGGAACCTCNCNNNTNNGNTCNGNNNANNNNNNGANNNCGGTTTCATCCCCACGCT

>Fam\_812\_57\_1 Nr. of seq. 1 Alignment length(with gaps) = 57 Alignment score = 0.000000  
GAGTCGTCACCACTATCCTGGTTCGAGGAGTTATCACCGTCGTCGTTTTGACTCGAA

>Fam\_813\_57\_1 Nr. of seq. 1 Alignment length(with gaps) = 57 Alignment score = 0.000000  
ACTTCTGAAAGGTACTTTTTGTGAATCTTCAATTGCCTTGAACATTGAAGGGGAATAA

>Fam\_814\_57\_1 Nr. of seq. 1 Alignment length(with gaps) = 57 Alignment score = 0.000000  
AATAAGTCAAAAACCGGAACCGGAACAAGTACCGAAACCCCGGAAACAGTAATAGAT

>Fam\_815\_57\_1 Nr. of seq. 1 Alignment length(with gaps) = 57 Alignment score = 0.000000  
GGTTCATCCCATAACACACGGGGAACCTCNCNNNATNNNCNNNTNNGNNTNNTNTTNC

>Fam\_816\_56\_1 Nr. of seq. 1 Alignment length(with gaps) = 56 Alignment score = 0.000000  
ATCAGTGAAGTTGTTTTGAACGTCTGCATCATTGCTGAACTCACAGCTCTATTAC

>Fam\_817\_54\_1 Nr. of seq. 1 Alignment length(with gaps) = 54 Alignment score = 0.000000  
TAGGGATGATATCTGTGATTCTAATGTGGAGTTAACGTTTGATAGTGAAGTGCT

>Fam\_818\_54\_1 Nr. of seq. 1 Alignment length(with gaps) = 54 Alignment score = 0.000000  
TCGCCGTCTTGGTTCGAACATCGGCGTCNCCTGTCGCTTGCGGGCGGTGGCG

>Fam\_819\_54\_1 Nr. of seq. 1 Alignment length(with gaps) = 54 Alignment score = 0.000000  
CCGCGAGGTTCGACCAGCGGGAGACCTCGGAACGAGCGGCGGTGAAACCGTGAG

>Fam\_820\_54\_1 Nr. of seq. 1 Alignment length(with gaps) = 54 Alignment score = 0.000000  
CCAAAGCCCCAGCCGCTCGGTAGTACGTGATCGACGACTCCGCGGTGAACACCG

>Fam\_821\_54\_1 Nr. of seq. 1 Alignment length(with gaps) = 54 Alignment score = 0.000000  
GATTCTCCTTTAATGTCTGATTCTGTCAATTTCTCCTTCTTACCTGATCCATTG

>Fam\_822\_53\_1 Nr. of seq. 1 Alignment length(with gaps) = 53 Alignment score = 0.000000  
AAATAAAAAATTAGATTAAATTCCTAAGGTAATAAATAACCAATATAGGAATTA

>Fam\_823\_52\_1 Nr. of seq. 1 Alignment length(with gaps) = 52 Alignment score = 0.000000  
CATATGAAATTATGTTTAGAAGCAGATCTTAGGAACCTAATTTTCTAAGTTA

>Fam\_824\_52\_1 Nr. of seq. 1 Alignment length(with gaps) = 52 Alignment score = 0.000000  
TTGTTTTGTAATGAGTTTTGGTATGGTTTTTTTTTAGTTGTTTGGGGATTTGT

>Fam\_825\_51\_1 Nr. of seq. 1 Alignment length(with gaps) = 51 Alignment score = 0.000000  
ATAAAGATTTAGAAAAATAGTTTAAAAAATAACTAAAATAACTTAAATT

>Fam\_826\_50\_1 Nr. of seq. 1 Alignment length(with gaps) = 50 Alignment score = 0.000000  
TTTGAACCTTATCTGGAATACTTTTGACCCTGGTCTGCTGACAGAATGCG

>Fam\_827\_50\_1 Nr. of seq. 1 Alignment length(with gaps) = 50 Alignment score = 0.000000  
CTAGAACATCTCCCTCTCATGCTCCAGATGGTGTCCGAAGTAACCTCTG

>Fam\_828\_49\_1 Nr. of seq. 1 Alignment length(with gaps) = 49 Alignment score = 0.000000



```

GTATTTTCGAAACCCTTTGGGTTTCTCAAACCTCCGTTCTGTCCGGAACGTC
>Fam_829_49_1 Nr. of seq. 1 Alignment length(with gaps) = 49 Alignment score = 0.000000
GAGGAGAAGCTTGAATTTAAGAGGAAGTGGGGTATTGAGTAGTTTTTTTT
>Fam_830_48_1 Nr. of seq. 1 Alignment length(with gaps) = 48 Alignment score = 0.000000
GGTTCCACGAGCCCCCGCTCGCAGGCTCGCGGGGACGCCGTAGAACAC
>Fam_831_48_1 Nr. of seq. 1 Alignment length(with gaps) = 48 Alignment score = 0.000000
AAAAAATAGGCGAATTTTATTTTTGTTTATTTAACTTTAAGAAAAGG
>Fam_832_48_1 Nr. of seq. 1 Alignment length(with gaps) = 48 Alignment score = 0.000000
TAAAATAAGTAAAATGTCTACTTTATTAATTAATGAAGTATAAAGCCT
>Fam_833_48_1 Nr. of seq. 1 Alignment length(with gaps) = 48 Alignment score = 0.000000
ATAAAAATAAAACCTAAAATAGAACAAAAAAAAAGATTCAAAAACCTGA
>Fam_834_48_1 Nr. of seq. 1 Alignment length(with gaps) = 48 Alignment score = 0.000000
CAATTAATGAAGATGAATTTACAGCAACTGAGGAACCTGTGTTCCCAT
>Fam_835_48_1 Nr. of seq. 1 Alignment length(with gaps) = 48 Alignment score = 0.000000
GAGAAGACGAAGTCTTCGAGATTTCGAGAGGTTATCAAACCTCGAGACG
>Fam_836_48_1 Nr. of seq. 1 Alignment length(with gaps) = 48 Alignment score = 0.000000
CATCGGCTCGCCGATAGATCCGCTGAAGGACTCGTTCATCGATCCATT
>Fam_837_48_1 Nr. of seq. 1 Alignment length(with gaps) = 48 Alignment score = 0.000000
GTTTCATTATCAGATTCTATTTTTGTATTTTCCGAGGAATTTGTTTCG
>Fam_838_48_1 Nr. of seq. 1 Alignment length(with gaps) = 48 Alignment score = 0.000000
GGAACAGGACTCGGAACAGCGGTAGCATCTACAACCGAACAGCAGTG
>Fam_839_47_1 Nr. of seq. 1 Alignment length(with gaps) = 47 Alignment score = 0.000000
GTTTTTTAATAATTTGAAATAATTAATTTTTTATTTTAAATTAGGT
>Fam_840_47_1 Nr. of seq. 1 Alignment length(with gaps) = 47 Alignment score = 0.000000
TCGCGGCTCGAAGCCTACGGCTTCTCACGCTCCCGTCTGTGGACAG
>Fam_841_47_1 Nr. of seq. 1 Alignment length(with gaps) = 47 Alignment score = 0.000000
TTTGTATTCCCTTATTTTCAGATCTTCAGTGTTCCTCATTCTAGACAA
>Fam_842_46_1 Nr. of seq. 1 Alignment length(with gaps) = 46 Alignment score = 0.000000
AAAAATTAATGAAATTATGATTGAAGGAATAAAAAAATTTTATCTA
>Fam_843_46_1 Nr. of seq. 1 Alignment length(with gaps) = 46 Alignment score = 0.000000
GTAATAATTCTATGTCTCTTTATCAATATAGAAAAGTAATGATAAAA
>Fam_844_45_1 Nr. of seq. 1 Alignment length(with gaps) = 45 Alignment score = 0.000000
TGGACGTCTCCGGGACGACGGTCCCGATCCAGGAAGACACCGCTC
>Fam_845_45_1 Nr. of seq. 1 Alignment length(with gaps) = 45 Alignment score = 0.000000
ACGTCGAACACGAGGTGTTCCATCGACTCGAGAACTACGGGCACG
>Fam_846_45_1 Nr. of seq. 1 Alignment length(with gaps) = 45 Alignment score = 0.000000
CAACAACACTACTGTAGAACCGACTACCACTCAAACAACCGAAACCA
>Fam_847_45_1 Nr. of seq. 1 Alignment length(with gaps) = 45 Alignment score = 0.000000

```

GCTCTCTTCGGTCGCCACATCGCTCGCGGGTCCCTCGCGCGGC  
>Fam\_848\_45\_1 Nr. of seq. 1 Alignment length(with gaps) = 45 Alignment score = 0.000000  
ATTAGTTTTTTTAAAAATGAAAAATTAAGATAGCTATTTTTATATT  
>Fam\_849\_45\_1 Nr. of seq. 1 Alignment length(with gaps) = 45 Alignment score = 0.000000  
TGATTCTTTTTTTTTTAAAATTGTTTTTAATATTTAATCACTATTC  
>Fam\_850\_45\_1 Nr. of seq. 1 Alignment length(with gaps) = 45 Alignment score = 0.000000  
CCTAATTTAGTTTTTTAAAAATATTATAAAATTTAATTTTAATTAG  
>Fam\_851\_45\_1 Nr. of seq. 1 Alignment length(with gaps) = 45 Alignment score = 0.000000  
AAGATAATCTTAAAAATAATTTAAAATCTTATAAAATTAAGAATTAA  
>Fam\_852\_45\_1 Nr. of seq. 1 Alignment length(with gaps) = 45 Alignment score = 0.000000  
CCGCACCTACGGTGCCTCAACTCCGCTCTTTCAGAGCATCGCACT  
>Fam\_853\_45\_1 Nr. of seq. 1 Alignment length(with gaps) = 45 Alignment score = 0.000000  
ATGGTTCTGTTCCGTTTCAGTGGGCTCTTCTAATGGCTCTTCCA  
>Fam\_854\_45\_1 Nr. of seq. 1 Alignment length(with gaps) = 45 Alignment score = 0.000000  
ACTTCAAGTGTCAACCTTAATGGAGAAGATAATNCAGGAATAAAT  
>Fam\_855\_45\_1 Nr. of seq. 1 Alignment length(with gaps) = 45 Alignment score = 0.000000  
ATGATAGGATAGCCCAGTCCCAGTCAGCAATCTCAGATCAAGTCA  
>Fam\_856\_44\_1 Nr. of seq. 1 Alignment length(with gaps) = 44 Alignment score = 0.000000  
TTTTTAAAGTTAATTAGATTTAAAAAGGATTAATTAAGTTTTCT  
>Fam\_857\_44\_1 Nr. of seq. 1 Alignment length(with gaps) = 44 Alignment score = 0.000000  
GTTTTGTATGACTTACCTATTACTTTATAGTTGCTTAATGGTA  
>Fam\_858\_44\_1 Nr. of seq. 1 Alignment length(with gaps) = 44 Alignment score = 0.000000  
TCTCCTCTGTCAATGCTTCCTAAATTCACAATAGCCTTTGTGT  
>Fam\_859\_43\_1 Nr. of seq. 1 Alignment length(with gaps) = 43 Alignment score = 0.000000  
TTTATAATATTTTACTAAAACAACTAACATTATGTAAACATA  
>Fam\_860\_43\_1 Nr. of seq. 1 Alignment length(with gaps) = 43 Alignment score = 0.000000  
AACCAAATTAATTAAGTAAATTGTATCAGATCAATTAATTA  
>Fam\_861\_42\_1 Nr. of seq. 1 Alignment length(with gaps) = 42 Alignment score = 0.000000  
GACGACACCTTCGAGGAGACGGCAACGGAAACGGTCACCGAG  
>Fam\_862\_42\_1 Nr. of seq. 1 Alignment length(with gaps) = 42 Alignment score = 0.000000  
GGGTCCAGGGAGTAGACAACCTCTCCTCAGAGGGTAGACAACA  
>Fam\_863\_42\_1 Nr. of seq. 1 Alignment length(with gaps) = 42 Alignment score = 0.000000  
AACCAAGAAAAACAAACAAATTCATAGAAAAATACGAACAC  
>Fam\_864\_42\_1 Nr. of seq. 1 Alignment length(with gaps) = 42 Alignment score = 0.000000  
TTGTCTTTTTGTAGGGTTTCTATTTGATTATTGAGCTTATTT  
>Fam\_865\_42\_1 Nr. of seq. 1 Alignment length(with gaps) = 42 Alignment score = 0.000000  
CTAATTCATATAATGATTTAAGTGTGGCTTTGAATCTGATG  
>Fam\_866\_42\_1 Nr. of seq. 1 Alignment length(with gaps) = 42 Alignment score = 0.000000

AGAAATTAAGTGATGCCTTAGAGAATAGTGAAAAGGAACGGC  
>Fam\_867\_42\_1 Nr. of seq. 1 Alignment length(with gaps) = 42 Alignment score = 0.000000  
GTCTTTTTCAGTGTGACTTTNGCTGAACTGTTTGTAGTGTTA  
>Fam\_868\_42\_1 Nr. of seq. 1 Alignment length(with gaps) = 42 Alignment score = 0.000000  
TTCTAGATTCCGAAGCTGAAGCTGATTTTGGTAACGACATAA  
>Fam\_869\_42\_1 Nr. of seq. 1 Alignment length(with gaps) = 42 Alignment score = 0.000000  
CTTTCTGAATTTAGCTCAATCATTCCAACCTTAATTCCTATA  
>Fam\_870\_42\_1 Nr. of seq. 1 Alignment length(with gaps) = 42 Alignment score = 0.000000  
TTAAAACTAAAAATTAGTAACCTACATACACGACTATCTTTA  
>Fam\_871\_42\_1 Nr. of seq. 1 Alignment length(with gaps) = 42 Alignment score = 0.000000  
TCTTCCTTTTTCAGTTGCAGTTTCTGCTTCAGTCTCTACTTTT  
>Fam\_872\_42\_1 Nr. of seq. 1 Alignment length(with gaps) = 42 Alignment score = 0.000000  
ACTGGAAATTAACAACCTTTAATTATATAAACTGTAATTAT  
>Fam\_873\_42\_1 Nr. of seq. 1 Alignment length(with gaps) = 42 Alignment score = 0.000000  
TTTTCTCTTTTTTCAGTTATATTCTCACTTAAATTTGATAAA  
>Fam\_874\_42\_1 Nr. of seq. 1 Alignment length(with gaps) = 42 Alignment score = 0.000000  
AAAAGTTCAACTCNTCTGAAATTGGAACNATGCAGAACTCTN  
>Fam\_875\_42\_1 Nr. of seq. 1 Alignment length(with gaps) = 42 Alignment score = 0.000000  
TTTCCGCTGTTCTTTGTTCCGCAGTGGGTGTGAGAGAGTACG  
>Fam\_876\_42\_1 Nr. of seq. 1 Alignment length(with gaps) = 42 Alignment score = 0.000000  
CCGATTGCTCCGTAGCTACTGACTCTACCGTCTCCGACAACCT  
>Fam\_877\_42\_1 Nr. of seq. 1 Alignment length(with gaps) = 42 Alignment score = 0.000000  
TCACTCCAAGAAGAGGTGAAGAGACAAGGTGAAGCCATTGTA  
>Fam\_878\_42\_1 Nr. of seq. 1 Alignment length(with gaps) = 42 Alignment score = 0.000000  
TCCTGCCATAGCCTCTCNATGTTTTCGTTAATNCTCCTATTC  
>Fam\_879\_41\_1 Nr. of seq. 1 Alignment length(with gaps) = 41 Alignment score = 0.000000  
CGATCCGGCTCGCTTGACTCACGCCGGATCGGTGGAGATGT  
>Fam\_880\_41\_1 Nr. of seq. 1 Alignment length(with gaps) = 41 Alignment score = 0.000000  
ATTATTCCAATCATTTTTAAGAGTATTTTCAGAGGCATTTTT  
>Fam\_881\_41\_1 Nr. of seq. 1 Alignment length(with gaps) = 41 Alignment score = 0.000000  
TGAAATTACTCATTTACCTTACGTTTCTCCTTAATGATCTAAA  
>Fam\_882\_41\_1 Nr. of seq. 1 Alignment length(with gaps) = 41 Alignment score = 0.000000  
TCTTCGAAGAATCTTCTGGATTCTTCTCACGTCTTTGAGAC  
>Fam\_883\_40\_1 Nr. of seq. 1 Alignment length(with gaps) = 40 Alignment score = 0.000000  
AAGTTATATAAACAAGTATCTTTACTAATTGTTTATAAGA  
>Fam\_884\_40\_1 Nr. of seq. 1 Alignment length(with gaps) = 40 Alignment score = 0.000000  
AGTTTATTTTACTTTAATTACTCTCTATTTTTCTAAAATC  
>Fam\_885\_40\_1 Nr. of seq. 1 Alignment length(with gaps) = 40 Alignment score = 0.000000

TTTCTAAAATTAGTTAATATTTTTTTTTATTAGATTATTT  
>Fam\_886\_40\_1 Nr. of seq. 1 Alignment length(with gaps) = 40 Alignment score = 0.000000  
TAATAATTTTCGAAAACAAGAGTCCTGGTATATCTTGGAAC  
>Fam\_887\_40\_1 Nr. of seq. 1 Alignment length(with gaps) = 40 Alignment score = 0.000000  
AGACTACTTCATGGACATTGATATTGAAATTCGTTCAAGC  
>Fam\_888\_40\_1 Nr. of seq. 1 Alignment length(with gaps) = 40 Alignment score = 0.000000  
CGGCCTCGCCCCGGTAAGTCGATCCGCGTCGGCCCGACAT  
>Fam\_889\_39\_1 Nr. of seq. 1 Alignment length(with gaps) = 39 Alignment score = 0.000000  
GGGGTGTGTCTGGGGCGGGCCGAGCGGCGTGGGCTCGAT  
>Fam\_890\_39\_1 Nr. of seq. 1 Alignment length(with gaps) = 39 Alignment score = 0.000000  
CACGAGACGATAATGCGGCGGAGACGAACGCGAGTACGC  
>Fam\_891\_39\_1 Nr. of seq. 1 Alignment length(with gaps) = 39 Alignment score = 0.000000  
CCGTCACCGTCNGTGTGATNCTGCAGTATCAACGTAG  
>Fam\_892\_39\_1 Nr. of seq. 1 Alignment length(with gaps) = 39 Alignment score = 0.000000  
TTAAATAAATGAGATATTCCTTTTTTATATGGAAAATCT  
>Fam\_893\_39\_1 Nr. of seq. 1 Alignment length(with gaps) = 39 Alignment score = 0.000000  
TCTGTCCAGTTGANTGTTAGGCTGTCTCCNCCTAATAGG  
>Fam\_894\_39\_1 Nr. of seq. 1 Alignment length(with gaps) = 39 Alignment score = 0.000000  
CGCCGCTGCTTCCACCACTGCTACGGTCTGCTTCTTC  
>Fam\_895\_39\_1 Nr. of seq. 1 Alignment length(with gaps) = 39 Alignment score = 0.000000  
GTCGAGGTTCCGGTCTGCTGATACCGAGGCCGAGGAT  
>Fam\_896\_39\_1 Nr. of seq. 1 Alignment length(with gaps) = 39 Alignment score = 0.000000  
CAGAGGATCTTGCGCCTGAGGGATCTGAGGAGCCGGTTG  
>Fam\_897\_39\_1 Nr. of seq. 1 Alignment length(with gaps) = 39 Alignment score = 0.000000  
TCTCCACCATTTATGGTCTCCGTGACGGTGGCCGTATCC  
>Fam\_898\_39\_1 Nr. of seq. 1 Alignment length(with gaps) = 39 Alignment score = 0.000000  
TTTTGTTTTTGGAGCATCTGCTACGGTACTAGTATCTGTG  
>Fam\_899\_39\_1 Nr. of seq. 1 Alignment length(with gaps) = 39 Alignment score = 0.000000  
TCACAGCAGTGCCTTCACAGTCTGCCTCGGTACAGTCG  
>Fam\_900\_39\_1 Nr. of seq. 1 Alignment length(with gaps) = 39 Alignment score = 0.000000  
CAGCATTGTCACATGTTTTTCTTCTGTTGAGGTATCTG  
>Fam\_901\_39\_1 Nr. of seq. 1 Alignment length(with gaps) = 39 Alignment score = 0.000000  
GGTTTTTTATTTGGTTTCACATTTTCGCTATTGATATCT  
>Fam\_902\_39\_1 Nr. of seq. 1 Alignment length(with gaps) = 39 Alignment score = 0.000000  
AATACAGTCATACACAATAATTCATGCAGTTGTCATCAC  
>Fam\_903\_39\_1 Nr. of seq. 1 Alignment length(with gaps) = 39 Alignment score = 0.000000  
TCCTGAATCATCATCCCAAGAACTGCCTCCATCATCACT  
>Fam\_904\_39\_1 Nr. of seq. 1 Alignment length(with gaps) = 39 Alignment score = 0.000000



CGAAACAGACAGCGTACTGCAGAGCCGCAACTCTGC  
>Fam\_924\_36\_1 Nr. of seq. 1 Alignment length(with gaps) = 36 Alignment score = 0.000000  
TTGTCTTCAACTGTCATATTGTCAGCTGCAGAGTCA  
>Fam\_925\_36\_1 Nr. of seq. 1 Alignment length(with gaps) = 36 Alignment score = 0.000000  
CTGTAAGCTGACCTATAAGCTAACTTATAAGTTGAC  
>Fam\_926\_36\_1 Nr. of seq. 1 Alignment length(with gaps) = 36 Alignment score = 0.000000  
CCAACCACTGTGTCGACTCCAATACCGACTGCAATC  
>Fam\_927\_36\_1 Nr. of seq. 1 Alignment length(with gaps) = 36 Alignment score = 0.000000  
CGTCTTCGTACGGTTCGATGTCCGGTCGGCTGATCCT  
>Fam\_928\_36\_1 Nr. of seq. 1 Alignment length(with gaps) = 36 Alignment score = 0.000000  
TCGCTTTTCGTCTCCGTCCTCTCTCACCCTCTTCC  
>Fam\_929\_35\_1 Nr. of seq. 1 Alignment length(with gaps) = 35 Alignment score = 0.000000  
GGCGGCGTGCACAGACGGGACGCCGGCACCTCTCA  
>Fam\_930\_35\_1 Nr. of seq. 1 Alignment length(with gaps) = 35 Alignment score = 0.000000  
AAATATAATAAACTAAATAGCCCATTAAGTATTC  
>Fam\_931\_35\_1 Nr. of seq. 1 Alignment length(with gaps) = 35 Alignment score = 0.000000  
AAAAATATCATACTCATTCGAGTTAATATAATATT  
>Fam\_932\_35\_1 Nr. of seq. 1 Alignment length(with gaps) = 35 Alignment score = 0.000000  
CAGTTTTGAATATTATATCAGTGTGTAAGTTTCTT  
>Fam\_933\_35\_1 Nr. of seq. 1 Alignment length(with gaps) = 35 Alignment score = 0.000000  
AAATAAGATTCTGTTTTTGAGAGATTCAGTAAATA  
>Fam\_934\_35\_1 Nr. of seq. 1 Alignment length(with gaps) = 35 Alignment score = 0.000000  
GTTTTATTCTTAGATTCATATTTTGTTGTCTTCAG  
>Fam\_935\_34\_1 Nr. of seq. 1 Alignment length(with gaps) = 34 Alignment score = 0.000000  
CGTTCAGCCGAGTCGTCTGTTTCGATGCGACTCGA  
>Fam\_936\_34\_1 Nr. of seq. 1 Alignment length(with gaps) = 34 Alignment score = 0.000000  
CATTGGAGTGTAATAAAAAAGGTGATTTTTATTA  
>Fam\_937\_34\_1 Nr. of seq. 1 Alignment length(with gaps) = 34 Alignment score = 0.000000  
TTATTTTTTTATCCAATCTTTTATATACTATTGG  
>Fam\_938\_34\_1 Nr. of seq. 1 Alignment length(with gaps) = 34 Alignment score = 0.000000  
AAAATAGTATAGGAGTATATAAAGGCTTATACGA  
>Fam\_939\_34\_1 Nr. of seq. 1 Alignment length(with gaps) = 34 Alignment score = 0.000000  
CTTGATCGAAACTCACTTTTCCAATAATAGTCTG  
>Fam\_940\_34\_1 Nr. of seq. 1 Alignment length(with gaps) = 34 Alignment score = 0.000000  
TCCTTTCTATTCTTCTCTTTTCTAAGACAAA  
>Fam\_941\_34\_1 Nr. of seq. 1 Alignment length(with gaps) = 34 Alignment score = 0.000000  
AAAGTAAGTAACCAAAGGAGTTCTTTAAAGAAAT  
>Fam\_942\_33\_1 Nr. of seq. 1 Alignment length(with gaps) = 33 Alignment score = 0.000000

CGTCGAAGGTCGCATCCCCGAAGANCGCCGTAT  
>Fam\_943\_33\_1 Nr. of seq. 1 Alignment length(with gaps) = 33 Alignment score = 0.000000  
TCATCTATCCTCCTGTTTAGCCTNGCTTCAACN  
>Fam\_944\_33\_1 Nr. of seq. 1 Alignment length(with gaps) = 33 Alignment score = 0.000000  
AAATCTAAAGCCGAAGATATNTCTGAAGATGTN  
>Fam\_945\_33\_1 Nr. of seq. 1 Alignment length(with gaps) = 33 Alignment score = 0.000000  
AACGGAACCAGTATAGACATATCNAGTCTATTN  
>Fam\_946\_33\_1 Nr. of seq. 1 Alignment length(with gaps) = 33 Alignment score = 0.000000  
CAGCTACAGAACCCCGAACATCCTCCAAATCAC  
>Fam\_947\_33\_1 Nr. of seq. 1 Alignment length(with gaps) = 33 Alignment score = 0.000000  
ACAAAAGAAAACTAGACCACAGAATAGACAAC  
>Fam\_948\_33\_1 Nr. of seq. 1 Alignment length(with gaps) = 33 Alignment score = 0.000000  
TCGGTTAGATGATTTTTAATATGAAAGCAATGC  
>Fam\_949\_33\_1 Nr. of seq. 1 Alignment length(with gaps) = 33 Alignment score = 0.000000  
AATCTTCAGCTNGCTGAGCCACACATTTTCTGA  
>Fam\_950\_33\_1 Nr. of seq. 1 Alignment length(with gaps) = 33 Alignment score = 0.000000  
ACTGAGCTAAAGGAAGACTGAGACGGAAGGAAA  
>Fam\_951\_33\_1 Nr. of seq. 1 Alignment length(with gaps) = 33 Alignment score = 0.000000  
GCAGAATCGCCAAAAGTAGAATACCGAAAANAG  
>Fam\_952\_33\_1 Nr. of seq. 1 Alignment length(with gaps) = 33 Alignment score = 0.000000  
TTTGTATATCAGATTGCGCTTATTAGGTCAGTA  
>Fam\_953\_33\_1 Nr. of seq. 1 Alignment length(with gaps) = 33 Alignment score = 0.000000  
TAATAGCCTGTTAGAACAGCTTACTTAAAACAA  
>Fam\_954\_33\_1 Nr. of seq. 1 Alignment length(with gaps) = 33 Alignment score = 0.000000  
AAATTCTGCTCTTAAACTCTTAGTAAGTTCACT  
>Fam\_955\_33\_1 Nr. of seq. 1 Alignment length(with gaps) = 33 Alignment score = 0.000000  
ATAACCAGTCCCCCAGAGGTCACNAGTCCCCGGC  
>Fam\_956\_33\_1 Nr. of seq. 1 Alignment length(with gaps) = 33 Alignment score = 0.000000  
TTC AACATTTAAAGGAGGAGTTTATTTTATTTT  
>Fam\_957\_33\_1 Nr. of seq. 1 Alignment length(with gaps) = 33 Alignment score = 0.000000  
GACCCGTCCGAATCATCCGATCCATCATCGTCC  
>Fam\_958\_33\_1 Nr. of seq. 1 Alignment length(with gaps) = 33 Alignment score = 0.000000  
GACGACGAAGATGACGAGATGAACGACGAGGTT  
>Fam\_959\_33\_1 Nr. of seq. 1 Alignment length(with gaps) = 33 Alignment score = 0.000000  
GTCGAATCGCGTTACTCGGCGTGAAAAGCGGCG  
>Fam\_960\_33\_1 Nr. of seq. 1 Alignment length(with gaps) = 33 Alignment score = 0.000000  
CGTCGGCGTCTTCCGCGTCGGCACCGTGTTCTGT  
>Fam\_961\_33\_1 Nr. of seq. 1 Alignment length(with gaps) = 33 Alignment score = 0.000000

GTCGTCCTTCTTGTCGTCAGCGTGCTTGCGGTC

>Fam\_962\_32\_1 Nr. of seq. 1 Alignment length(with gaps) = 32 Alignment score = 0.000000  
TTAATTTAAAGTAACTAAAAATTATAAATCAG

>Fam\_963\_32\_1 Nr. of seq. 1 Alignment length(with gaps) = 32 Alignment score = 0.000000  
AATCCATTATTTTCATAATTTAACCCTAAAAG

>Fam\_964\_32\_1 Nr. of seq. 1 Alignment length(with gaps) = 32 Alignment score = 0.000000  
TAACCACAACGGCACTACGGCACGGCGATTGG

>Fam\_965\_32\_1 Nr. of seq. 1 Alignment length(with gaps) = 32 Alignment score = 0.000000  
TTCTGAGAATCCAATTTAATCTTTTTAAATAA

>Fam\_966\_32\_1 Nr. of seq. 1 Alignment length(with gaps) = 32 Alignment score = 0.000000  
TGAAAACCTAGTCTCCTTAAACCTTAACTCC

>Fam\_967\_32\_1 Nr. of seq. 1 Alignment length(with gaps) = 32 Alignment score = 0.000000  
GATCTTTTCTTGCCCTTCTTACATTCTTCTTTT

>Fam\_968\_31\_1 Nr. of seq. 1 Alignment length(with gaps) = 31 Alignment score = 0.000000  
ATCAATCCATGTCTACTTAAGAAATGCTATT

>Fam\_969\_31\_1 Nr. of seq. 1 Alignment length(with gaps) = 31 Alignment score = 0.000000  
AAAAAAGATAATTGGGTGTAGTTTCTATTT

>Fam\_970\_31\_1 Nr. of seq. 1 Alignment length(with gaps) = 31 Alignment score = 0.000000  
TGTGGCTTTTATTTTTTTGGGCATTATATGT

>Fam\_971\_31\_1 Nr. of seq. 1 Alignment length(with gaps) = 31 Alignment score = 0.000000  
CCACAGAGGACACAGAGGAATTAGATAATCA

>Fam\_972\_31\_1 Nr. of seq. 1 Alignment length(with gaps) = 31 Alignment score = 0.000000  
GTTTACAACCCCTAATGCCAATAAAAATATG

>Fam\_973\_31\_1 Nr. of seq. 1 Alignment length(with gaps) = 31 Alignment score = 0.000000  
CTGGTTTACTTCCGGCTTATTCTAGCTTATT

>Fam\_974\_31\_1 Nr. of seq. 1 Alignment length(with gaps) = 31 Alignment score = 0.000000  
CCTACTATAATTAGAGTAGACATATACCAAG

>Fam\_975\_31\_1 Nr. of seq. 1 Alignment length(with gaps) = 31 Alignment score = 0.000000  
TTTGGAGGTTTTACCGTTTTTTGTTGGATT

>Fam\_976\_31\_1 Nr. of seq. 1 Alignment length(with gaps) = 31 Alignment score = 0.000000  
TTATTATTTCTCTCTTACTTCCCTTTTTCTC

>Fam\_977\_31\_1 Nr. of seq. 1 Alignment length(with gaps) = 31 Alignment score = 0.000000  
ATGTTAAGTCCATAAACTAAGTCCATGTACT

>Fam\_978\_30\_1 Nr. of seq. 1 Alignment length(with gaps) = 30 Alignment score = 0.000000  
CTCGCCAAACCCCTCAACCGACAACCATCTA

>Fam\_979\_30\_1 Nr. of seq. 1 Alignment length(with gaps) = 30 Alignment score = 0.000000  
GTGGTCGAACGGATGGTAGATGGACCGGCA

>Fam\_980\_30\_1 Nr. of seq. 1 Alignment length(with gaps) = 30 Alignment score = 0.000000



GCGGAGGCGAAGGCGAAGGAGAATGCAGAT  
>Fam\_981\_30\_1 Nr. of seq. 1 Alignment length(with gaps) = 30 Alignment score = 0.000000  
CACGACCCTCTCACGGCGCAGGCCACACG  
>Fam\_982\_30\_1 Nr. of seq. 1 Alignment length(with gaps) = 30 Alignment score = 0.000000  
GGCTGATCTGGCGTGTCAGTTGGCGTGTCTG  
>Fam\_983\_30\_1 Nr. of seq. 1 Alignment length(with gaps) = 30 Alignment score = 0.000000  
CATCGTCTCGTTCTCCATCGACCCATCGTC  
>Fam\_984\_30\_1 Nr. of seq. 1 Alignment length(with gaps) = 30 Alignment score = 0.000000  
GGATTGATTAGGTGATCATGTTCTTTTATG  
>Fam\_985\_30\_1 Nr. of seq. 1 Alignment length(with gaps) = 30 Alignment score = 0.000000  
AATAAATTTATTATNAATTGTTTTTATGTG  
>Fam\_986\_30\_1 Nr. of seq. 1 Alignment length(with gaps) = 30 Alignment score = 0.000000  
ATAGTTAAAACTAAATGAATACTAATTAA  
>Fam\_987\_30\_1 Nr. of seq. 1 Alignment length(with gaps) = 30 Alignment score = 0.000000  
AAAGATAAAAAGAATTAATAATTAATAAG  
>Fam\_988\_30\_1 Nr. of seq. 1 Alignment length(with gaps) = 30 Alignment score = 0.000000  
AACACCAACGGAAACGGCCACGACAACCCC  
>Fam\_989\_30\_1 Nr. of seq. 1 Alignment length(with gaps) = 30 Alignment score = 0.000000  
AAATCGGCTCCATAAAGAGATGCACAAGAG  
>Fam\_990\_30\_1 Nr. of seq. 1 Alignment length(with gaps) = 30 Alignment score = 0.000000  
ATTTATTTAAGCATTTTTTCACTTGATAAC  
>Fam\_991\_30\_1 Nr. of seq. 1 Alignment length(with gaps) = 30 Alignment score = 0.000000  
GATTCAGGTTTTTTTTTTCAGTTTTGGTTTCT  
>Fam\_992\_30\_1 Nr. of seq. 1 Alignment length(with gaps) = 30 Alignment score = 0.000000  
AGACTTACGGAGATGAACCGACTAGGGATC  
>Fam\_993\_30\_1 Nr. of seq. 1 Alignment length(with gaps) = 30 Alignment score = 0.000000  
AGTCTAAGTAATAACAGTTAGAGCATTAAC  
>Fam\_994\_30\_1 Nr. of seq. 1 Alignment length(with gaps) = 30 Alignment score = 0.000000  
TTTTTTAATAAATTATTACTCATCTAGTTC  
>Fam\_995\_30\_1 Nr. of seq. 1 Alignment length(with gaps) = 30 Alignment score = 0.000000  
CTCTAAACAAAGTNTNTCTGAACAAAATAA  
>Fam\_996\_30\_1 Nr. of seq. 1 Alignment length(with gaps) = 30 Alignment score = 0.000000  
TTAACACGTGATATAGAGATAATTAGGTAG  
>Fam\_997\_30\_1 Nr. of seq. 1 Alignment length(with gaps) = 30 Alignment score = 0.000000  
AGCAGTGTCTGTCAGCTGCAACATCTTCTGC  
>Fam\_998\_30\_1 Nr. of seq. 1 Alignment length(with gaps) = 30 Alignment score = 0.000000  
TACACTTTCCCTGACTCCACTCCAGGGTTGT  
>Fam\_999\_30\_1 Nr. of seq. 1 Alignment length(with gaps) = 30 Alignment score = 0.000000

ACAGGAAATTTAACTGATTATTTAACTTC  
>Fam\_1000\_30\_1 Nr. of seq. 1 Alignment length(with gaps) = 30 Alignment score = 0.000000  
TCTTAAGAACTATTTTCCTTCTAAAGCTGTA  
>Fam\_1001\_30\_1 Nr. of seq. 1 Alignment length(with gaps) = 30 Alignment score = 0.000000  
ATCTTGAAGGAGCTAACCTTNATGAAGCTC  
>Fam\_1002\_30\_1 Nr. of seq. 1 Alignment length(with gaps) = 30 Alignment score = 0.000000  
CCTCAGATAAAGGCAAACACAGATGCCATA  
>Fam\_1003\_30\_1 Nr. of seq. 1 Alignment length(with gaps) = 30 Alignment score = 0.000000  
GCCCTCGAGCGAGACATCGCCAAACTGGTC  
>Fam\_1004\_30\_1 Nr. of seq. 1 Alignment length(with gaps) = 30 Alignment score = 0.000000  
CCCGGCGACTCGCCGTCGTCACCACTCTGG  
>Fam\_1005\_30\_1 Nr. of seq. 1 Alignment length(with gaps) = 30 Alignment score = 0.000000  
GTGTGCGTGGAGTGGTGGTGTGGCGAGTGC  
>Fam\_1006\_30\_1 Nr. of seq. 1 Alignment length(with gaps) = 30 Alignment score = 0.000000  
TCTTCGTATTTCGTCATCCTCGTGCTCCTCA  
>Fam\_1007\_29\_1 Nr. of seq. 1 Alignment length(with gaps) = 29 Alignment score = 0.000000  
GTCAGCGATCGAGAACCAGGACGTACCGC  
>Fam\_1008\_29\_1 Nr. of seq. 1 Alignment length(with gaps) = 29 Alignment score = 0.000000  
GTTTTTTATTATTTAAATGGGAAATGTGA  
>Fam\_1009\_29\_1 Nr. of seq. 1 Alignment length(with gaps) = 29 Alignment score = 0.000000  
TTTTTATACTAAACNCTAGTTAGTATANT  
>Fam\_1010\_29\_1 Nr. of seq. 1 Alignment length(with gaps) = 29 Alignment score = 0.000000  
AAATTATTTTTTAAATAATTAATNTTAAT  
>Fam\_1011\_29\_1 Nr. of seq. 1 Alignment length(with gaps) = 29 Alignment score = 0.000000  
TTATTTAAAAGTAGTTAACTTTTATAAC  
>Fam\_1012\_29\_1 Nr. of seq. 1 Alignment length(with gaps) = 29 Alignment score = 0.000000  
TTTATACGGTACAATATACGGAATGATTA  
>Fam\_1013\_29\_1 Nr. of seq. 1 Alignment length(with gaps) = 29 Alignment score = 0.000000  
CCTTTTCTTTAACTTGCTTTTTTTAGCTGA  
>Fam\_1014\_29\_1 Nr. of seq. 1 Alignment length(with gaps) = 29 Alignment score = 0.000000  
AGATTTTTTTTAGGCAATTGTAATTAAGTAACT  
>Fam\_1015\_29\_1 Nr. of seq. 1 Alignment length(with gaps) = 29 Alignment score = 0.000000  
TTCAGGAGTTCTAAACTCTAAACCAGCCC  
>Fam\_1016\_29\_1 Nr. of seq. 1 Alignment length(with gaps) = 29 Alignment score = 0.000000  
GAAAGAATCCCAATAATAAAAATTTACCA  
>Fam\_1017\_29\_1 Nr. of seq. 1 Alignment length(with gaps) = 29 Alignment score = 0.000000  
CATGTTATTTTTTCAGGAAGTATGATTTTA  
>Fam\_1018\_29\_1 Nr. of seq. 1 Alignment length(with gaps) = 29 Alignment score = 0.000000

TCCAATGATTATTGCTTAGATAATTCAAA  
>Fam\_1019\_29\_1 Nr. of seq. 1 Alignment length(with gaps) = 29 Alignment score = 0.000000  
GAATAAGTTGTACGAAAAACCGGAGAAAA  
>Fam\_1020\_29\_1 Nr. of seq. 1 Alignment length(with gaps) = 29 Alignment score = 0.000000  
TGAGTTTACTATATTCCTCAATTAATTTCG  
>Fam\_1021\_29\_1 Nr. of seq. 1 Alignment length(with gaps) = 29 Alignment score = 0.000000  
GAAAGGAAAGTGAAAATTTAGAAAATTGA  
>Fam\_1022\_29\_1 Nr. of seq. 1 Alignment length(with gaps) = 29 Alignment score = 0.000000  
CTGTCTTTTCGTGTCGTCGTTCCCACAACG  
>Fam\_1023\_28\_1 Nr. of seq. 1 Alignment length(with gaps) = 28 Alignment score = 0.000000  
CCAACCGCTAGTCTCACAACCTGCTCTGA  
>Fam\_1024\_28\_1 Nr. of seq. 1 Alignment length(with gaps) = 28 Alignment score = 0.000000  
ACGACCGAGGTGCGTCGGTTAAGGACAT  
>Fam\_1025\_28\_1 Nr. of seq. 1 Alignment length(with gaps) = 28 Alignment score = 0.000000  
CTGCTCTCCGATAAGAGGCGACGTGTCT  
>Fam\_1026\_28\_1 Nr. of seq. 1 Alignment length(with gaps) = 28 Alignment score = 0.000000  
TCACCTCCGCTTCTCGCAGTCACCTCGT  
>Fam\_1027\_28\_1 Nr. of seq. 1 Alignment length(with gaps) = 28 Alignment score = 0.000000  
CGGTGGAGTGGGTAGCAGGCTGGTTTGG  
>Fam\_1028\_28\_1 Nr. of seq. 1 Alignment length(with gaps) = 28 Alignment score = 0.000000  
TTATTTTAAAAGAATATTATTATTGG  
>Fam\_1029\_28\_1 Nr. of seq. 1 Alignment length(with gaps) = 28 Alignment score = 0.000000  
CAAGATTTAATTCGTGTTTGATACCGAC  
>Fam\_1030\_28\_1 Nr. of seq. 1 Alignment length(with gaps) = 28 Alignment score = 0.000000  
CAGATTCAATTCTTTAGATCCAATCCTT  
>Fam\_1031\_28\_1 Nr. of seq. 1 Alignment length(with gaps) = 28 Alignment score = 0.000000  
ATCAGTTAATCATAATTGGTTAATTGTT  
>Fam\_1032\_28\_1 Nr. of seq. 1 Alignment length(with gaps) = 28 Alignment score = 0.000000  
GAAGTAATCGATATCTGAAGCGTTTCAA  
>Fam\_1033\_28\_1 Nr. of seq. 1 Alignment length(with gaps) = 28 Alignment score = 0.000000  
GTTGCAGATATCTATTCTTCTATACGTA  
>Fam\_1034\_28\_1 Nr. of seq. 1 Alignment length(with gaps) = 28 Alignment score = 0.000000  
TTTATTGCCATATTACATTTTGCCACTT  
>Fam\_1035\_28\_1 Nr. of seq. 1 Alignment length(with gaps) = 28 Alignment score = 0.000000  
TTTCCTTAACCTATATTTACAGGCTTAT  
>Fam\_1036\_28\_1 Nr. of seq. 1 Alignment length(with gaps) = 28 Alignment score = 0.000000  
GTGCAATACTAACTAGTGATATCCAGCA  
>Fam\_1037\_28\_1 Nr. of seq. 1 Alignment length(with gaps) = 28 Alignment score = 0.000000

TAATGGAATCTGGTTAATAGAGTCTAGT  
 >Fam\_1038\_28\_1 Nr. of seq. 1 Alignment length(with gaps) = 28 Alignment score = 0.000000  
 TTTTATTTTGGAGTCTTTTCTTTAGAATC  
 >Fam\_1039\_28\_1 Nr. of seq. 1 Alignment length(with gaps) = 28 Alignment score = 0.000000  
 TATATTATCCAAATATCAGGTAATACTC  
 >Fam\_1040\_28\_1 Nr. of seq. 1 Alignment length(with gaps) = 28 Alignment score = 0.000000  
 ATTATCAGTAACATGCTTAATATGCTTA  
 >Fam\_1041\_28\_1 Nr. of seq. 1 Alignment length(with gaps) = 28 Alignment score = 0.000000  
 AATTTACTAATTTTAATTC AATAGTTTT  
 >Fam\_1042\_28\_1 Nr. of seq. 1 Alignment length(with gaps) = 28 Alignment score = 0.000000  
 GCTGTTTATCTGGACAGCTCTTCCTCTG  
 >Fam\_1043\_28\_1 Nr. of seq. 1 Alignment length(with gaps) = 28 Alignment score = 0.000000  
 CAGAGCAAGAAACTGAGAACAAAAGTC  
 >Fam\_1044\_28\_1 Nr. of seq. 1 Alignment length(with gaps) = 28 Alignment score = 0.000000  
 TTGATTACAGAATTATNAAATACAGAAC  
 >Fam\_1045\_28\_1 Nr. of seq. 1 Alignment length(with gaps) = 28 Alignment score = 0.000000  
 AGTGGAGTGC GGGCGGTGGGATTGCAGG  
 >Fam\_1046\_27\_1 Nr. of seq. 1 Alignment length(with gaps) = 27 Alignment score = 0.000000  
 GGAGTTGGGGTAACCGGTGGCTTGGTT  
 >Fam\_1047\_27\_1 Nr. of seq. 1 Alignment length(with gaps) = 27 Alignment score = 0.000000  
 CCGCCGACGAGCCGTCCCATGCTTCGA  
 >Fam\_1048\_27\_1 Nr. of seq. 1 Alignment length(with gaps) = 27 Alignment score = 0.000000  
 CTTCCCCACTCTTCACTTCTCCCGCCT  
 >Fam\_1049\_27\_1 Nr. of seq. 1 Alignment length(with gaps) = 27 Alignment score = 0.000000  
 AGGCCGACAGGCGAGAGTGAAATACAC  
 >Fam\_1050\_27\_1 Nr. of seq. 1 Alignment length(with gaps) = 27 Alignment score = 0.000000  
 TCACTGTCCGTTGGTTCTTCGGTCTCC  
 >Fam\_1051\_27\_1 Nr. of seq. 1 Alignment length(with gaps) = 27 Alignment score = 0.000000  
 GAGAACGGTGAGAACGGTGAGAACGGC  
 >Fam\_1052\_27\_1 Nr. of seq. 1 Alignment length(with gaps) = 27 Alignment score = 0.000000  
 CCATGGCGACCACGAACACGGACACGG  
 >Fam\_1053\_27\_1 Nr. of seq. 1 Alignment length(with gaps) = 27 Alignment score = 0.000000  
 ATGCTGAATGGTCCC GCGACGAGTCAC  
 >Fam\_1054\_27\_1 Nr. of seq. 1 Alignment length(with gaps) = 27 Alignment score = 0.000000  
 CAACCAGACGCCGCCCGGTCAAGCTGG  
 >Fam\_1055\_27\_1 Nr. of seq. 1 Alignment length(with gaps) = 27 Alignment score = 0.000000  
 CAGTCTCGGCATCCAATCATCGGACA  
 >Fam\_1056\_27\_1 Nr. of seq. 1 Alignment length(with gaps) = 27 Alignment score = 0.000000

CGTAGGGACTGTCGGTNGNAATGCCCT  
>Fam\_1057\_27\_1 Nr. of seq. 1 Alignment length(with gaps) = 27 Alignment score = 0.000000  
TCCCGATCGATGATTCGCGTGTGGGC  
>Fam\_1058\_27\_1 Nr. of seq. 1 Alignment length(with gaps) = 27 Alignment score = 0.000000  
TGGGACTGGGGAGACAGTGACAGCAGT  
>Fam\_1059\_27\_1 Nr. of seq. 1 Alignment length(with gaps) = 27 Alignment score = 0.000000  
CTCCTCCCATTCTCTTCCTCTCCATT  
>Fam\_1060\_27\_1 Nr. of seq. 1 Alignment length(with gaps) = 27 Alignment score = 0.000000  
TGTTGTTGTGGCTGGTGTGACGCAGT  
>Fam\_1061\_27\_1 Nr. of seq. 1 Alignment length(with gaps) = 27 Alignment score = 0.000000  
GGCTGCTGGAAAGCCTGCTGCCCCAGN  
>Fam\_1062\_27\_1 Nr. of seq. 1 Alignment length(with gaps) = 27 Alignment score = 0.000000  
ACAGGGGATACTGGAGATACCGGTGAC  
>Fam\_1063\_27\_1 Nr. of seq. 1 Alignment length(with gaps) = 27 Alignment score = 0.000000  
GACACTTATATATTAACATCCAGAAAT  
>Fam\_1064\_27\_1 Nr. of seq. 1 Alignment length(with gaps) = 27 Alignment score = 0.000000  
CCATATCTTCCTTTATAGAGATCTAAG  
>Fam\_1065\_27\_1 Nr. of seq. 1 Alignment length(with gaps) = 27 Alignment score = 0.000000  
AGATACAGAATCACTATATCCCCCAGT  
>Fam\_1066\_27\_1 Nr. of seq. 1 Alignment length(with gaps) = 27 Alignment score = 0.000000  
TCTGACAACAATACTGGAGATAACTCC  
>Fam\_1067\_27\_1 Nr. of seq. 1 Alignment length(with gaps) = 27 Alignment score = 0.000000  
AATATTTACTTCATTGAACCTAGCTGC  
>Fam\_1068\_27\_1 Nr. of seq. 1 Alignment length(with gaps) = 27 Alignment score = 0.000000  
AACAAATAAGAAAACAAATCAACTCTAT  
>Fam\_1069\_27\_1 Nr. of seq. 1 Alignment length(with gaps) = 27 Alignment score = 0.000000  
TTGAGCCGGAATCCGAGCTTCCATCAC  
>Fam\_1070\_27\_1 Nr. of seq. 1 Alignment length(with gaps) = 27 Alignment score = 0.000000  
CAATCCTTTAACAAATCTTCCAATCAC  
>Fam\_1071\_27\_1 Nr. of seq. 1 Alignment length(with gaps) = 27 Alignment score = 0.000000  
ACTTAATTCATTTTTGTTTTTAAACTA  
>Fam\_1072\_27\_1 Nr. of seq. 1 Alignment length(with gaps) = 27 Alignment score = 0.000000  
GGATATACAGTATGATGTAAACGTGAT  
>Fam\_1073\_27\_1 Nr. of seq. 1 Alignment length(with gaps) = 27 Alignment score = 0.000000  
TCGTCAGAGGAATTACTGTTTCCGCC  
>Fam\_1074\_27\_1 Nr. of seq. 1 Alignment length(with gaps) = 27 Alignment score = 0.000000  
CTGAGAGGATTGAAAAGTCTGGAAAAG  
>Fam\_1075\_27\_1 Nr. of seq. 1 Alignment length(with gaps) = 27 Alignment score = 0.000000

```
TTTATCAAAAACCTTTTTAGAAAAAAGT
>Fam_1076_27_1 Nr. of seq. 1 Alignment length(with gaps) = 27 Alignment score = 0.000000
GATCCAGGGTCTAAACTTCCATTATCT
>Fam_1077_27_1 Nr. of seq. 1 Alignment length(with gaps) = 27 Alignment score = 0.000000
TCTGGCCTATCAAACAGTACTCTAAA
>Fam_1078_27_1 Nr. of seq. 1 Alignment length(with gaps) = 27 Alignment score = 0.000000
AACAGATAGTCGGCATTATTTATCTAA
>Fam_1079_27_1 Nr. of seq. 1 Alignment length(with gaps) = 27 Alignment score = 0.000000
ATTTAAACGAGGATCCAGTTGATGATG
>Fam_1080_27_1 Nr. of seq. 1 Alignment length(with gaps) = 27 Alignment score = 0.000000
TTAATTCTTTTTAACCTGGGTTCTACC
>Fam_1081_27_1 Nr. of seq. 1 Alignment length(with gaps) = 27 Alignment score = 0.000000
AAAAAGAGAAGGAAAAACAGGAAATNG
>Fam_1082_27_1 Nr. of seq. 1 Alignment length(with gaps) = 27 Alignment score = 0.000000
CTCAATGCAACTGCCAACGCAACTGCG
>Fam_1083_27_1 Nr. of seq. 1 Alignment length(with gaps) = 27 Alignment score = 0.000000
CGTCGTCCGAGTCCGAGTCAGTGTCGC
>Fam_1084_27_1 Nr. of seq. 1 Alignment length(with gaps) = 27 Alignment score = 0.000000
ACGGTGACGACGGCGACGACGGCACCG
>Fam_1085_27_1 Nr. of seq. 1 Alignment length(with gaps) = 27 Alignment score = 0.000000
GAAGATGGCTACTAAGGAAGACCTCCA
>Fam_1086_26_1 Nr. of seq. 1 Alignment length(with gaps) = 26 Alignment score = 0.000000
TTCAGCTTTCAATTCGGTCTTTTCCG
>Fam_1087_26_1 Nr. of seq. 1 Alignment length(with gaps) = 26 Alignment score = 0.000000
GTATGAATATGTGGTATGACTTTCAG
>Fam_1088_26_1 Nr. of seq. 1 Alignment length(with gaps) = 26 Alignment score = 0.000000
ACCTGAAATCTGAATTGAAGGTTTAT
>Fam_1089_26_1 Nr. of seq. 1 Alignment length(with gaps) = 26 Alignment score = 0.000000
TGATAACATGGATATTCTTAACATGT
>Fam_1090_26_1 Nr. of seq. 1 Alignment length(with gaps) = 26 Alignment score = 0.000000
TTCATCTAATTTTGTACTATAAGTTC
>Fam_1091_26_1 Nr. of seq. 1 Alignment length(with gaps) = 26 Alignment score = 0.000000
TTTTCACTTTGATGTTTCATTTGAG
>Fam_1092_26_1 Nr. of seq. 1 Alignment length(with gaps) = 26 Alignment score = 0.000000
TATCATTGAATTACAGATAATCATCT
>Fam_1093_26_1 Nr. of seq. 1 Alignment length(with gaps) = 26 Alignment score = 0.000000
TCCACTAATCCACTAATAATACAGAT
>Fam_1094_26_1 Nr. of seq. 1 Alignment length(with gaps) = 26 Alignment score = 0.000000
```

```

TTTTTCAGTTTTTCAGTCTATAATCATT
>Fam_1095_26_1 Nr. of seq. 1 Alignment length(with gaps) = 26 Alignment score = 0.000000
ATCAAGATTTTCGAAAAAGAGAGTCAG
>Fam_1096_26_1 Nr. of seq. 1 Alignment length(with gaps) = 26 Alignment score = 0.000000
GAATTATTGACTGGAATTGTTGGCTA
>Fam_1097_26_1 Nr. of seq. 1 Alignment length(with gaps) = 26 Alignment score = 0.000000
CAATAAAGAAAATCGATCAAGAAAAC
>Fam_1098_26_1 Nr. of seq. 1 Alignment length(with gaps) = 26 Alignment score = 0.000000
TTTTACTGATTAATTCNTTGGATTGA
>Fam_1099_26_1 Nr. of seq. 1 Alignment length(with gaps) = 26 Alignment score = 0.000000
ATATTCCAGCTTAAGTCTTAAAATCC
>Fam_1100_26_1 Nr. of seq. 1 Alignment length(with gaps) = 26 Alignment score = 0.000000
GTTGGATTGTGGGGTAATATAGTCCG
>Fam_1101_26_1 Nr. of seq. 1 Alignment length(with gaps) = 26 Alignment score = 0.000000
AAAATTCAAGATTCAGGGAATCATTT
>Fam_1102_26_1 Nr. of seq. 1 Alignment length(with gaps) = 26 Alignment score = 0.000000
AGATATTATTGTTTATTTTGCTTGTT
>Fam_1103_26_1 Nr. of seq. 1 Alignment length(with gaps) = 26 Alignment score = 0.000000
TTTACAGCTATCATTTTCATATCTGTC
>Fam_1104_26_1 Nr. of seq. 1 Alignment length(with gaps) = 26 Alignment score = 0.000000
GGAATTTCCATATCCTTTATTTACCC
>Fam_1105_26_1 Nr. of seq. 1 Alignment length(with gaps) = 26 Alignment score = 0.000000
CCATTGATAACTCGTTATTAATTTAC
>Fam_1106_25_1 Nr. of seq. 1 Alignment length(with gaps) = 25 Alignment score = 0.000000
CTATGAGACGCCAACGAACGAAGAA
>Fam_1107_25_1 Nr. of seq. 1 Alignment length(with gaps) = 25 Alignment score = 0.000000
TTATAAATATGAATAGATTTAGTTT
>Fam_1108_25_1 Nr. of seq. 1 Alignment length(with gaps) = 25 Alignment score = 0.000000
TTAAAGGTCCGATTGAACGGATACG
>Fam_1109_25_1 Nr. of seq. 1 Alignment length(with gaps) = 25 Alignment score = 0.000000
ATAGCCATAATTCAGTGTTTATCAG
>Fam_1110_25_1 Nr. of seq. 1 Alignment length(with gaps) = 25 Alignment score = 0.000000
TAAATTAICTCATTCGTCATCTGCAG
>Fam_1111_25_1 Nr. of seq. 1 Alignment length(with gaps) = 25 Alignment score = 0.000000
TTTAGCCTACTCAGCTTTATGAATC
>Fam_1112_25_1 Nr. of seq. 1 Alignment length(with gaps) = 25 Alignment score = 0.000000
TAATATTTGACGATTTATCATTGT
>Fam_1113_25_1 Nr. of seq. 1 Alignment length(with gaps) = 25 Alignment score = 0.000000

```

```

AAGTATAATATAAGTCTCTATATCA
>Fam_1114_25_1 Nr. of seq. 1 Alignment length(with gaps) = 25 Alignment score = 0.000000
GTAAGTGTAATTGTCATATATTATGC
>Fam_1115_25_1 Nr. of seq. 1 Alignment length(with gaps) = 25 Alignment score = 0.000000
ACTTTAATTTTCATTTTTGCTAATCA
>Fam_1116_25_1 Nr. of seq. 1 Alignment length(with gaps) = 25 Alignment score = 0.000000
CTTTGGATTTTCAGAAAGAATTAACA
>Fam_1117_25_1 Nr. of seq. 1 Alignment length(with gaps) = 25 Alignment score = 0.000000
TGTTTTTACTCCTGCTTCTTAATTA
>Fam_1118_25_1 Nr. of seq. 1 Alignment length(with gaps) = 25 Alignment score = 0.000000
AATTAGTAAGAAAATCTCATTCTGG
>Fam_1119_25_1 Nr. of seq. 1 Alignment length(with gaps) = 25 Alignment score = 0.000000
CTGTAAAATATAGGTGAAAATGAA
>Fam_1120_25_1 Nr. of seq. 1 Alignment length(with gaps) = 25 Alignment score = 0.000000
GTGAACTATCTATCTTTAGATTAGC
>Fam_1121_25_1 Nr. of seq. 1 Alignment length(with gaps) = 25 Alignment score = 0.000000
TCATGTAAGTTGTCCCTCCAAAAC
>Fam_1122_25_1 Nr. of seq. 1 Alignment length(with gaps) = 25 Alignment score = 0.000000
GTTTAGTAACATTGTTATTTTACAG
>Fam_1123_24_1 Nr. of seq. 1 Alignment length(with gaps) = 24 Alignment score = 0.000000
GAACGGATCGGGGAACGGTAGGT
>Fam_1124_24_1 Nr. of seq. 1 Alignment length(with gaps) = 24 Alignment score = 0.000000
TCGGTTTCGTTTCGNGGCGGTTCT
>Fam_1125_24_1 Nr. of seq. 1 Alignment length(with gaps) = 24 Alignment score = 0.000000
CCGTCAGTCCGGACATCGTTCCCA
>Fam_1126_24_1 Nr. of seq. 1 Alignment length(with gaps) = 24 Alignment score = 0.000000
CGATTCCGGAAGTACGCAGAAGA
>Fam_1127_24_1 Nr. of seq. 1 Alignment length(with gaps) = 24 Alignment score = 0.000000
CGATAACTGACTGCTGTTTCGAGTT
>Fam_1128_24_1 Nr. of seq. 1 Alignment length(with gaps) = 24 Alignment score = 0.000000
AACGAGACCAGTACTGACGATCTG
>Fam_1129_24_1 Nr. of seq. 1 Alignment length(with gaps) = 24 Alignment score = 0.000000
AACGAGACGGCCGAAGACGGCCTC
>Fam_1130_24_1 Nr. of seq. 1 Alignment length(with gaps) = 24 Alignment score = 0.000000
CTCGTCGGCGGTGGAGCCGTCTGT
>Fam_1131_24_1 Nr. of seq. 1 Alignment length(with gaps) = 24 Alignment score = 0.000000
GACGATGAGGGCGAAAGCGACGGT
>Fam_1132_24_1 Nr. of seq. 1 Alignment length(with gaps) = 24 Alignment score = 0.000000

```



TTCCTGTGACTCCGGAGAATCCTG  
>Fam\_1133\_24\_1 Nr. of seq. 1 Alignment length(with gaps) = 24 Alignment score = 0.000000  
GGTATTGAGGAAGGTAGATTGGAA  
>Fam\_1134\_24\_1 Nr. of seq. 1 Alignment length(with gaps) = 24 Alignment score = 0.000000  
ATGCTCATGCTCATGCTCCTGATG  
>Fam\_1135\_24\_1 Nr. of seq. 1 Alignment length(with gaps) = 24 Alignment score = 0.000000  
TGATTCTAATCCAAAACCTGATGC  
>Fam\_1136\_24\_1 Nr. of seq. 1 Alignment length(with gaps) = 24 Alignment score = 0.000000  
ACTGCTTCTTCAGAAGATTCCTCA  
>Fam\_1137\_24\_1 Nr. of seq. 1 Alignment length(with gaps) = 24 Alignment score = 0.000000  
CACAGAAGACCAACCAGGAGAACA  
>Fam\_1138\_24\_1 Nr. of seq. 1 Alignment length(with gaps) = 24 Alignment score = 0.000000  
ACGGTGAACGTTACGCCGACTCCG  
>Fam\_1139\_24\_1 Nr. of seq. 1 Alignment length(with gaps) = 24 Alignment score = 0.000000  
AAGATCAATAAAAATTAGCTTAAGA  
>Fam\_1140\_24\_1 Nr. of seq. 1 Alignment length(with gaps) = 24 Alignment score = 0.000000  
ATATCGAAGTGGATCTGAAGGAGC  
>Fam\_1141\_24\_1 Nr. of seq. 1 Alignment length(with gaps) = 24 Alignment score = 0.000000  
TCAGTTTTTCTGTATCTCTGTTTC  
>Fam\_1142\_24\_1 Nr. of seq. 1 Alignment length(with gaps) = 24 Alignment score = 0.000000  
CCAGGTAGTGGGGGATGGGGTACA  
>Fam\_1143\_24\_1 Nr. of seq. 1 Alignment length(with gaps) = 24 Alignment score = 0.000000  
ACGGTTAATCACAGATATAGAGCC  
>Fam\_1144\_24\_1 Nr. of seq. 1 Alignment length(with gaps) = 24 Alignment score = 0.000000  
ACTAGTAAATGAAGTATATTTTTTC  
>Fam\_1145\_24\_1 Nr. of seq. 1 Alignment length(with gaps) = 24 Alignment score = 0.000000  
TTTCTTCTTTAAGGGAATTCTGAT  
>Fam\_1146\_24\_1 Nr. of seq. 1 Alignment length(with gaps) = 24 Alignment score = 0.000000  
TAATATTGAAATTAACCTGTAGAN  
>Fam\_1147\_24\_1 Nr. of seq. 1 Alignment length(with gaps) = 24 Alignment score = 0.000000  
GCATATGAAGCAATTACAATACAG  
>Fam\_1148\_24\_1 Nr. of seq. 1 Alignment length(with gaps) = 24 Alignment score = 0.000000  
TTAATCTCAATTGTAATACAGTGT  
>Fam\_1149\_24\_1 Nr. of seq. 1 Alignment length(with gaps) = 24 Alignment score = 0.000000  
GATAATCATGTAAAGGAGAATATCA  
>Fam\_1150\_24\_1 Nr. of seq. 1 Alignment length(with gaps) = 24 Alignment score = 0.000000  
CAGTTAAGGGTACAACCTTAACAAC  
>Fam\_1151\_24\_1 Nr. of seq. 1 Alignment length(with gaps) = 24 Alignment score = 0.000000

AAAGATTCCAAAAAGTATGGAGAG  
>Fam\_1152\_24\_1 Nr. of seq. 1 Alignment length(with gaps) = 24 Alignment score = 0.000000  
TTCTTGAGATTTAAAAAGAACGTT  
>Fam\_1153\_24\_1 Nr. of seq. 1 Alignment length(with gaps) = 24 Alignment score = 0.000000  
ATCTGAACAAAATATGAAGATATT  
>Fam\_1154\_24\_1 Nr. of seq. 1 Alignment length(with gaps) = 24 Alignment score = 0.000000  
ACTTTAGTTAGATCTCAGTTTTTT  
>Fam\_1155\_24\_1 Nr. of seq. 1 Alignment length(with gaps) = 24 Alignment score = 0.000000  
CAGATACAGGATGAGCCTGCCCAT  
>Fam\_1156\_24\_1 Nr. of seq. 1 Alignment length(with gaps) = 24 Alignment score = 0.000000  
ATTCAGGTCTACTTTATGATTCCGG  
>Fam\_1157\_24\_1 Nr. of seq. 1 Alignment length(with gaps) = 24 Alignment score = 0.000000  
TTTATTCCTTATCTAAAAGNATCT  
>Fam\_1158\_24\_1 Nr. of seq. 1 Alignment length(with gaps) = 24 Alignment score = 0.000000  
ATTGGAAAGTTAAGTGATTACTTG  
>Fam\_1159\_24\_1 Nr. of seq. 1 Alignment length(with gaps) = 24 Alignment score = 0.000000  
AATGCAATTAGTAGTACAATCAGC  
>Fam\_1160\_24\_1 Nr. of seq. 1 Alignment length(with gaps) = 24 Alignment score = 0.000000  
TTGATTTCGTTTCTTCACTCTTTG  
>Fam\_1161\_24\_1 Nr. of seq. 1 Alignment length(with gaps) = 24 Alignment score = 0.000000  
GTGTATGAGATAAGTTTGATTCTG  
>Fam\_1162\_24\_1 Nr. of seq. 1 Alignment length(with gaps) = 24 Alignment score = 0.000000  
AAGAATGGATAATTACGATCATTC  
>Fam\_1163\_24\_1 Nr. of seq. 1 Alignment length(with gaps) = 24 Alignment score = 0.000000  
GGATTAGAAACAGGATAAGTAAAA  
>Fam\_1164\_24\_1 Nr. of seq. 1 Alignment length(with gaps) = 24 Alignment score = 0.000000  
TTTCATTTCTTGGCTCAGCAAGAN  
>Fam\_1165\_24\_1 Nr. of seq. 1 Alignment length(with gaps) = 24 Alignment score = 0.000000  
CGTCGTGGTGGCCCTCGTGATGAT  
>Fam\_1166\_24\_1 Nr. of seq. 1 Alignment length(with gaps) = 24 Alignment score = 0.000000  
GGCGAGACGGCTGCGGACGACAGC  
>Fam\_1167\_24\_1 Nr. of seq. 1 Alignment length(with gaps) = 24 Alignment score = 0.000000  
CAGCCACAGTCGCAGTCGCAATCG  
>Fam\_1168\_24\_1 Nr. of seq. 1 Alignment length(with gaps) = 24 Alignment score = 0.000000  
CGTCTGTGTGTGCGTGGTGGTTCGT  
>Fam\_1169\_24\_1 Nr. of seq. 1 Alignment length(with gaps) = 24 Alignment score = 0.000000  
GTGAGCGGGACGACGTTCCGCTAG  
>Fam\_1170\_24\_1 Nr. of seq. 1 Alignment length(with gaps) = 24 Alignment score = 0.000000

GGTAATGTAAGTGTGCCACCGGGA  
>Fam\_1171\_23\_1 Nr. of seq. 1 Alignment length(with gaps) = 23 Alignment score = 0.000000  
CGGTCAGGTGCGGGTGCCTCTGG  
>Fam\_1172\_23\_1 Nr. of seq. 1 Alignment length(with gaps) = 23 Alignment score = 0.000000  
CATCTATCTTCGTACGACCCAAC  
>Fam\_1173\_23\_1 Nr. of seq. 1 Alignment length(with gaps) = 23 Alignment score = 0.000000  
AGCCAGATGTTTATAGCTAACCC  
>Fam\_1174\_23\_1 Nr. of seq. 1 Alignment length(with gaps) = 23 Alignment score = 0.000000  
TATAAAATAAATANGATGAAAAG  
>Fam\_1175\_23\_1 Nr. of seq. 1 Alignment length(with gaps) = 23 Alignment score = 0.000000  
TATTTATATACTTTTTATTTAG  
>Fam\_1176\_23\_1 Nr. of seq. 1 Alignment length(with gaps) = 23 Alignment score = 0.000000  
GAGCCTGCACTCAGGCTATATAA  
>Fam\_1177\_23\_1 Nr. of seq. 1 Alignment length(with gaps) = 23 Alignment score = 0.000000  
ATTTGAATTACAAATCTGAGTTT  
>Fam\_1178\_23\_1 Nr. of seq. 1 Alignment length(with gaps) = 23 Alignment score = 0.000000  
AAGTAAGGTTGAAAGGTTTTGGA  
>Fam\_1179\_23\_1 Nr. of seq. 1 Alignment length(with gaps) = 23 Alignment score = 0.000000  
AATCCTTTACTTACTCTTACTTT  
>Fam\_1180\_23\_1 Nr. of seq. 1 Alignment length(with gaps) = 23 Alignment score = 0.000000  
TTTGACTTAATGGAAAACACATA  
>Fam\_1181\_23\_1 Nr. of seq. 1 Alignment length(with gaps) = 23 Alignment score = 0.000000  
ATTTTGAGTTCAGCTTTAGGTTT  
>Fam\_1182\_23\_1 Nr. of seq. 1 Alignment length(with gaps) = 23 Alignment score = 0.000000  
TGGGTAATGTTTGTTTTTTAAGG  
>Fam\_1183\_23\_1 Nr. of seq. 1 Alignment length(with gaps) = 23 Alignment score = 0.000000  
TTTCTGTTTCAGCCTTGCTATATT  
>Fam\_1184\_23\_1 Nr. of seq. 1 Alignment length(with gaps) = 23 Alignment score = 0.000000  
TGAAGATTATTACTGTCATTTGT  
>Fam\_1185\_23\_1 Nr. of seq. 1 Alignment length(with gaps) = 23 Alignment score = 0.000000  
TGAAAGAGGTAGAGAGAAGATTG  
>Fam\_1186\_23\_1 Nr. of seq. 1 Alignment length(with gaps) = 23 Alignment score = 0.000000  
ATAATTTTCATGTATCACACATC  
>Fam\_1187\_23\_1 Nr. of seq. 1 Alignment length(with gaps) = 23 Alignment score = 0.000000  
ATAACGAAATTTCTCGAGATTCA  
>Fam\_1188\_23\_1 Nr. of seq. 1 Alignment length(with gaps) = 23 Alignment score = 0.000000  
GTTACTTTTTGCAAATCAGAGAG  
>Fam\_1189\_23\_1 Nr. of seq. 1 Alignment length(with gaps) = 23 Alignment score = 0.000000

GATTAATTTGTCTGACTGATTTT

>Fam\_1190\_23\_1 Nr. of seq. 1 Alignment length(with gaps) = 23 Alignment score = 0.000000  
CTTTCTGCAGGTTTTAATTCAAT

>Fam\_1191\_23\_1 Nr. of seq. 1 Alignment length(with gaps) = 23 Alignment score = 0.000000  
ATATTGAGATCAATCCATAACTA

>Fam\_1192\_23\_1 Nr. of seq. 1 Alignment length(with gaps) = 23 Alignment score = 0.000000  
TTTCTTGCCCTGGTTTTTAGTGGT

>Fam\_1193\_23\_1 Nr. of seq. 1 Alignment length(with gaps) = 23 Alignment score = 0.000000  
TCCTTAGTTATGAATCATTATAA

>Fam\_1194\_23\_1 Nr. of seq. 1 Alignment length(with gaps) = 23 Alignment score = 0.000000  
TCGCGTCCAGTCGTTTCGTTTCTG

>Fam\_1195\_22\_1 Nr. of seq. 1 Alignment length(with gaps) = 22 Alignment score = 0.000000  
GCGGTGGACGGAGATCGTGAAG

>Fam\_1196\_22\_1 Nr. of seq. 1 Alignment length(with gaps) = 22 Alignment score = 0.000000  
TTGTTGCGCGGTTGTTGGCCGG

>Fam\_1197\_22\_1 Nr. of seq. 1 Alignment length(with gaps) = 22 Alignment score = 0.000000  
AGTGTGTTACGAGTATGCCACG

>Fam\_1198\_22\_1 Nr. of seq. 1 Alignment length(with gaps) = 22 Alignment score = 0.000000  
TTATTATTTTATAGTATCAGTC

>Fam\_1199\_22\_1 Nr. of seq. 1 Alignment length(with gaps) = 22 Alignment score = 0.000000  
TCAGTAAGGTGGATGAGGTGTG

>Fam\_1200\_22\_1 Nr. of seq. 1 Alignment length(with gaps) = 22 Alignment score = 0.000000  
GGGGTGGATCAGTAAGGTGCTT

>Fam\_1201\_22\_1 Nr. of seq. 1 Alignment length(with gaps) = 22 Alignment score = 0.000000  
TCCAATTGATTTTCGATTAGTT

>Fam\_1202\_22\_1 Nr. of seq. 1 Alignment length(with gaps) = 22 Alignment score = 0.000000  
AGGTTAATTCAAGCCTATTCAA

>Fam\_1203\_22\_1 Nr. of seq. 1 Alignment length(with gaps) = 22 Alignment score = 0.000000  
TAATTTTGATCTATAGAACGTT

>Fam\_1204\_22\_1 Nr. of seq. 1 Alignment length(with gaps) = 22 Alignment score = 0.000000  
AACCTGAAAATGTGTACATTCA

>Fam\_1205\_22\_1 Nr. of seq. 1 Alignment length(with gaps) = 22 Alignment score = 0.000000  
GGGATAGTTGAACTTAACTTTT

>Fam\_1206\_22\_1 Nr. of seq. 1 Alignment length(with gaps) = 22 Alignment score = 0.000000  
TAAAATATCAAATAACATAGTC

>Fam\_1207\_22\_1 Nr. of seq. 1 Alignment length(with gaps) = 22 Alignment score = 0.000000  
AGTTAATAACGAGAAGTGGCAG

>Fam\_1208\_22\_1 Nr. of seq. 1 Alignment length(with gaps) = 22 Alignment score = 0.000000

CAGGAATCTCAATTAACCTAAC  
>Fam\_1209\_22\_1 Nr. of seq. 1 Alignment length(with gaps) = 22 Alignment score = 0.000000  
TTAGCTTCAGGAGAGTTTAATG  
>Fam\_1210\_22\_1 Nr. of seq. 1 Alignment length(with gaps) = 22 Alignment score = 0.000000  
AAGTAAAAGTGAAAGTTGAAGG  
>Fam\_1211\_22\_1 Nr. of seq. 1 Alignment length(with gaps) = 22 Alignment score = 0.000000  
CTCTTTTAAAACCTGTACCTTT  
>Fam\_1212\_22\_1 Nr. of seq. 1 Alignment length(with gaps) = 22 Alignment score = 0.000000  
TTTTAGCATTACTGTATTGGAG  
>Fam\_1213\_22\_1 Nr. of seq. 1 Alignment length(with gaps) = 22 Alignment score = 0.000000  
TTTCTAAATAACTTTTATCATA  
>Fam\_1214\_22\_1 Nr. of seq. 1 Alignment length(with gaps) = 22 Alignment score = 0.000000  
AATTCCATAGTATTCACCAGA  
>Fam\_1215\_22\_1 Nr. of seq. 1 Alignment length(with gaps) = 22 Alignment score = 0.000000  
TACCTTATTCAAAGCAAACCT  
>Fam\_1216\_22\_1 Nr. of seq. 1 Alignment length(with gaps) = 22 Alignment score = 0.000000  
TTGATTTATTTAGAATACATAC  
>Fam\_1217\_22\_1 Nr. of seq. 1 Alignment length(with gaps) = 22 Alignment score = 0.000000  
CTTTTTACTGGTATACTGCTTA  
>Fam\_1218\_22\_1 Nr. of seq. 1 Alignment length(with gaps) = 22 Alignment score = 0.000000  
TTTTTCCTGAATTGTGTTATTG  
>Fam\_1219\_22\_1 Nr. of seq. 1 Alignment length(with gaps) = 22 Alignment score = 0.000000  
TATATTTACTGAGTTTAGAGGA  
>Fam\_1220\_22\_1 Nr. of seq. 1 Alignment length(with gaps) = 22 Alignment score = 0.000000  
AAAATAACTGCTGTTTGAGGAG  
>Fam\_1221\_22\_1 Nr. of seq. 1 Alignment length(with gaps) = 22 Alignment score = 0.000000  
AGTAGAAGGAGAAGGAAAACCT  
>Fam\_1222\_22\_1 Nr. of seq. 1 Alignment length(with gaps) = 22 Alignment score = 0.000000  
TCACAAAGAAATCCGAGAATAC  
>Fam\_1223\_22\_1 Nr. of seq. 1 Alignment length(with gaps) = 22 Alignment score = 0.000000  
TAATTA AAAATTAANTAAAAGC  
>Fam\_1224\_22\_1 Nr. of seq. 1 Alignment length(with gaps) = 22 Alignment score = 0.000000  
AATACATGGAGCACACCGGAA  
>Fam\_1225\_22\_1 Nr. of seq. 1 Alignment length(with gaps) = 22 Alignment score = 0.000000  
TTTCAGGTAAATACTCTGATTA  
>Fam\_1226\_22\_1 Nr. of seq. 1 Alignment length(with gaps) = 22 Alignment score = 0.000000  
AAAAGTCTTCATGTCCGGTAAC  
>Fam\_1227\_22\_1 Nr. of seq. 1 Alignment length(with gaps) = 22 Alignment score = 0.000000

ACAATCCAGGATGATTTGTTGA

>Fam\_1228\_22\_1 Nr. of seq. 1 Alignment length(with gaps) = 22 Alignment score = 0.000000  
AGCTGGAAGAAAATTACAAAAG

>Fam\_1229\_22\_1 Nr. of seq. 1 Alignment length(with gaps) = 22 Alignment score = 0.000000  
TAAAGGAAAGCATCTTCACTAA

>Fam\_1230\_22\_1 Nr. of seq. 1 Alignment length(with gaps) = 22 Alignment score = 0.000000  
TTCAATTATTTTACTGGTAGAA

>Fam\_1231\_22\_1 Nr. of seq. 1 Alignment length(with gaps) = 22 Alignment score = 0.000000  
CACGTAAAAAGTAATAGAATTT

>Fam\_1232\_22\_1 Nr. of seq. 1 Alignment length(with gaps) = 22 Alignment score = 0.000000  
TCAAACCAAATCAAAAACACCT

>Fam\_1233\_22\_1 Nr. of seq. 1 Alignment length(with gaps) = 22 Alignment score = 0.000000  
TCTAACCTTTTTTAAGGTTTTC

>Fam\_1234\_22\_1 Nr. of seq. 1 Alignment length(with gaps) = 22 Alignment score = 0.000000  
GTTGTTTAGAAAATACTTGCTTA

>Fam\_1235\_22\_1 Nr. of seq. 1 Alignment length(with gaps) = 22 Alignment score = 0.000000  
TATAATTAACTAAAGTATAACA

>Fam\_1236\_22\_1 Nr. of seq. 1 Alignment length(with gaps) = 22 Alignment score = 0.000000  
ATAACTTATAATGTTAAAACAA

>Fam\_1237\_22\_1 Nr. of seq. 1 Alignment length(with gaps) = 22 Alignment score = 0.000000  
ATTAACAATTGAATACAGAGGG

>Fam\_1238\_22\_1 Nr. of seq. 1 Alignment length(with gaps) = 22 Alignment score = 0.000000  
TCGCTGCGGTAACGCCACTGTC

>Fam\_1239\_22\_1 Nr. of seq. 1 Alignment length(with gaps) = 22 Alignment score = 0.000000  
GCGTTTCGAGGCGTAACTGAAG

>Fam\_1240\_21\_1 Nr. of seq. 1 Alignment length(with gaps) = 21 Alignment score = 0.000000  
ACAACCTGTGGAACGCGACTA

>Fam\_1241\_21\_1 Nr. of seq. 1 Alignment length(with gaps) = 21 Alignment score = 0.000000  
GATGAGACTGTGGA ACTTAAG

>Fam\_1242\_21\_1 Nr. of seq. 1 Alignment length(with gaps) = 21 Alignment score = 0.000000  
CGATCGTTCGTCGATGTCGGAC

>Fam\_1243\_21\_1 Nr. of seq. 1 Alignment length(with gaps) = 21 Alignment score = 0.000000  
CGACGCCGAGGGGGGTATGGA

>Fam\_1244\_21\_1 Nr. of seq. 1 Alignment length(with gaps) = 21 Alignment score = 0.000000  
GTTGGTTGTAAATGCCCAAGA

>Fam\_1245\_21\_1 Nr. of seq. 1 Alignment length(with gaps) = 21 Alignment score = 0.000000  
AGAAGCACCCAGATTNCACCTT

>Fam\_1246\_21\_1 Nr. of seq. 1 Alignment length(with gaps) = 21 Alignment score = 0.000000

GGTTCTGTTCAATTGGCTAAC

>Fam\_1247\_21\_1 Nr. of seq. 1 Alignment length(with gaps) = 21 Alignment score = 0.000000  
CCATTACCACCAGGANNAGTA

>Fam\_1248\_21\_1 Nr. of seq. 1 Alignment length(with gaps) = 21 Alignment score = 0.000000  
GTTTAAACAAGAATATCTAAT

>Fam\_1249\_21\_1 Nr. of seq. 1 Alignment length(with gaps) = 21 Alignment score = 0.000000  
CCACTGTCTCCACCACCCAT

>Fam\_1250\_21\_1 Nr. of seq. 1 Alignment length(with gaps) = 21 Alignment score = 0.000000  
TCATGCCATAAAAAATAACATGG

>Fam\_1251\_21\_1 Nr. of seq. 1 Alignment length(with gaps) = 21 Alignment score = 0.000000  
AGCGCTCCGCGCGGTTACTAG

>Fam\_1252\_21\_1 Nr. of seq. 1 Alignment length(with gaps) = 21 Alignment score = 0.000000  
TTGTTTTCTGATATGGGAGAC

>Fam\_1253\_21\_1 Nr. of seq. 1 Alignment length(with gaps) = 21 Alignment score = 0.000000  
TTTATTATTGTGTCTTGTCCC

>Fam\_1254\_21\_1 Nr. of seq. 1 Alignment length(with gaps) = 21 Alignment score = 0.000000  
ATCCTATAAACAATACAGTAG

>Fam\_1255\_21\_1 Nr. of seq. 1 Alignment length(with gaps) = 21 Alignment score = 0.000000  
TCCTGTTTATGTAATCTTAAT

>Fam\_1256\_21\_1 Nr. of seq. 1 Alignment length(with gaps) = 21 Alignment score = 0.000000  
TCCGTTTGGTTATCCAGAGAT

>Fam\_1257\_21\_1 Nr. of seq. 1 Alignment length(with gaps) = 21 Alignment score = 0.000000  
ATTTTCTCTTATCGTTATCCC

>Fam\_1258\_21\_1 Nr. of seq. 1 Alignment length(with gaps) = 21 Alignment score = 0.000000  
TTCAGTAGAGAACCCTGTTAG

>Fam\_1259\_21\_1 Nr. of seq. 1 Alignment length(with gaps) = 21 Alignment score = 0.000000  
TTTCCTTTTTACAACAGAATG

>Fam\_1260\_21\_1 Nr. of seq. 1 Alignment length(with gaps) = 21 Alignment score = 0.000000  
TCTGCATTTTTAACTCTCTAC

>Fam\_1261\_21\_1 Nr. of seq. 1 Alignment length(with gaps) = 21 Alignment score = 0.000000  
AATTATGTTTCTTATTGAGTA

>Fam\_1262\_21\_1 Nr. of seq. 1 Alignment length(with gaps) = 21 Alignment score = 0.000000  
CTGTCATTTCTAGTGTTTCAC

>Fam\_1263\_21\_1 Nr. of seq. 1 Alignment length(with gaps) = 21 Alignment score = 0.000000  
TAAGGTATAAGGAAGTTGGGT

>Fam\_1264\_21\_1 Nr. of seq. 1 Alignment length(with gaps) = 21 Alignment score = 0.000000  
TAAAAAATGGCAAAATACCTA

>Fam\_1265\_21\_1 Nr. of seq. 1 Alignment length(with gaps) = 21 Alignment score = 0.000000

ATAAATCATTGATCTGTCCTT

>Fam\_1266\_21\_1 Nr. of seq. 1 Alignment length(with gaps) = 21 Alignment score = 0.000000  
GAGGTAGTAGAACCCACTGAA

>Fam\_1267\_21\_1 Nr. of seq. 1 Alignment length(with gaps) = 21 Alignment score = 0.000000  
CGTCTTCTTCGACAACATCAG

>Fam\_1268\_21\_1 Nr. of seq. 1 Alignment length(with gaps) = 21 Alignment score = 0.000000  
CCGGAAAAAACTTTAATGAG

>Fam\_1269\_21\_1 Nr. of seq. 1 Alignment length(with gaps) = 21 Alignment score = 0.000000  
AACAGAGGGTAGAGCCTGTGA

>Fam\_1270\_21\_1 Nr. of seq. 1 Alignment length(with gaps) = 21 Alignment score = 0.000000  
GAATTTTCAGGATTATGGCTGA

>Fam\_1271\_21\_1 Nr. of seq. 1 Alignment length(with gaps) = 21 Alignment score = 0.000000  
TGAGGAATGAAGAATAAAACA

>Fam\_1272\_21\_1 Nr. of seq. 1 Alignment length(with gaps) = 21 Alignment score = 0.000000  
GATAATTGCTGGTATCTTCAA

>Fam\_1273\_21\_1 Nr. of seq. 1 Alignment length(with gaps) = 21 Alignment score = 0.000000  
AATTTCAAATTAACAGGCA

>Fam\_1274\_21\_1 Nr. of seq. 1 Alignment length(with gaps) = 21 Alignment score = 0.000000  
AATGCATAATCGGTTAGTTTG

>Fam\_1275\_21\_1 Nr. of seq. 1 Alignment length(with gaps) = 21 Alignment score = 0.000000  
ATAATATACTGAAATAATTCT

>Fam\_1276\_21\_1 Nr. of seq. 1 Alignment length(with gaps) = 21 Alignment score = 0.000000  
TTAATTTTAANTACATAAGTC

>Fam\_1277\_21\_1 Nr. of seq. 1 Alignment length(with gaps) = 21 Alignment score = 0.000000  
ATTTTGCATTCCAAATTCAC

>Fam\_1278\_21\_1 Nr. of seq. 1 Alignment length(with gaps) = 21 Alignment score = 0.000000  
GGATGATAACAAAACGATTTG

>Fam\_1279\_21\_1 Nr. of seq. 1 Alignment length(with gaps) = 21 Alignment score = 0.000000  
TTGCAGTTGAATAATAGACTA

>Fam\_1280\_21\_1 Nr. of seq. 1 Alignment length(with gaps) = 21 Alignment score = 0.000000  
CCCTTCATCTCTTTCATATCA

>Fam\_1281\_21\_1 Nr. of seq. 1 Alignment length(with gaps) = 21 Alignment score = 0.000000  
GTGCACACTCCACTGTGAGCC

>Fam\_1282\_21\_1 Nr. of seq. 1 Alignment length(with gaps) = 21 Alignment score = 0.000000  
GACGACGATGACGACCCAGCT

>Fam\_1283\_21\_1 Nr. of seq. 1 Alignment length(with gaps) = 21 Alignment score = 0.000000  
CTGACGACGCTGGAAACGGTG

>Fam\_1284\_21\_1 Nr. of seq. 1 Alignment length(with gaps) = 21 Alignment score = 0.000000



TTGAAGCGTTTATGCTTATCA  
>Fam\_1285\_20\_1 Nr. of seq. 1 Alignment length(with gaps) = 20 Alignment score = 0.000000  
AAATATTTTAGNCCTATTTT  
>Fam\_1286\_20\_1 Nr. of seq. 1 Alignment length(with gaps) = 20 Alignment score = 0.000000  
TTCAAAGTATAGGTATCTG  
>Fam\_1287\_20\_1 Nr. of seq. 1 Alignment length(with gaps) = 20 Alignment score = 0.000000  
ACTCAAGTGATTTTTCTCTT  
>Fam\_1288\_20\_1 Nr. of seq. 1 Alignment length(with gaps) = 20 Alignment score = 0.000000  
TATTACCTGAGAGAGGTGTG  
>Fam\_1289\_20\_1 Nr. of seq. 1 Alignment length(with gaps) = 20 Alignment score = 0.000000  
TAGTTGTTAATAGCTATCAG  
>Fam\_1290\_20\_1 Nr. of seq. 1 Alignment length(with gaps) = 20 Alignment score = 0.000000  
AGTTACAGTAAAACACATTT  
>Fam\_1291\_20\_1 Nr. of seq. 1 Alignment length(with gaps) = 20 Alignment score = 0.000000  
AACAGTTTATCTCATATTTT  
>Fam\_1292\_20\_1 Nr. of seq. 1 Alignment length(with gaps) = 20 Alignment score = 0.000000  
CCTTTAAGTCACTATTTTCA  
>Fam\_1293\_20\_1 Nr. of seq. 1 Alignment length(with gaps) = 20 Alignment score = 0.000000  
CCTTTAAACAATCCTATCAT  
>Fam\_1294\_20\_1 Nr. of seq. 1 Alignment length(with gaps) = 20 Alignment score = 0.000000  
ATTTTGATAGACACTACATG  
>Fam\_1295\_20\_1 Nr. of seq. 1 Alignment length(with gaps) = 20 Alignment score = 0.000000  
GTTTACTTTCACTCACTTTT  
>Fam\_1296\_20\_1 Nr. of seq. 1 Alignment length(with gaps) = 20 Alignment score = 0.000000  
TTATTTACTGCTTTTTACTC  
>Fam\_1297\_20\_1 Nr. of seq. 1 Alignment length(with gaps) = 20 Alignment score = 0.000000  
AATAATCAAAAAGGTAAGCTT  
>Fam\_1298\_20\_1 Nr. of seq. 1 Alignment length(with gaps) = 20 Alignment score = 0.000000  
TAATCTCCGATAATCTCGGG  
>Fam\_1299\_20\_1 Nr. of seq. 1 Alignment length(with gaps) = 20 Alignment score = 0.000000  
TACTTTGGTATCAGACATTT  
>Fam\_1300\_20\_1 Nr. of seq. 1 Alignment length(with gaps) = 20 Alignment score = 0.000000  
AAAAATTAAGACAGANCAG  
>Fam\_1301\_20\_1 Nr. of seq. 1 Alignment length(with gaps) = 20 Alignment score = 0.000000  
TTTCTTATTTTTTTATGCAG  
>Fam\_1302\_20\_1 Nr. of seq. 1 Alignment length(with gaps) = 20 Alignment score = 0.000000  
CGATTTTTTCTTTTCCCATA  
>Fam\_1303\_20\_1 Nr. of seq. 1 Alignment length(with gaps) = 20 Alignment score = 0.000000

```
ACCTCACCATTTTGACGTTC
>Fam_1304_20_1 Nr. of seq. 1 Alignment length(with gaps) = 20 Alignment score = 0.000000
  ATTTCTAACTTCTAGGGACA
>Fam_1305_20_1 Nr. of seq. 1 Alignment length(with gaps) = 20 Alignment score = 0.000000
  ACTCGACATTACAACCATTT
>Fam_1306_20_1 Nr. of seq. 1 Alignment length(with gaps) = 20 Alignment score = 0.000000
  CGAAGCGAGTGCGTCCTGAA
>Fam_1307_20_1 Nr. of seq. 1 Alignment length(with gaps) = 20 Alignment score = 0.000000
  TTCATTTTCGANNACACCCCC
>Fam_1308_19_1 Nr. of seq. 1 Alignment length(with gaps) = 19 Alignment score = 0.000000
  GTAGAGAAGGGTGGGTAGA
>Fam_1309_19_1 Nr. of seq. 1 Alignment length(with gaps) = 19 Alignment score = 0.000000
  CGACGACCCGCCACCGGTC
>Fam_1310_19_1 Nr. of seq. 1 Alignment length(with gaps) = 19 Alignment score = 0.000000
  CTGATTCGTGTGCTCGAGA
>Fam_1311_19_1 Nr. of seq. 1 Alignment length(with gaps) = 19 Alignment score = 0.000000
  ACAATTTTACGAAGCCACG
>Fam_1312_19_1 Nr. of seq. 1 Alignment length(with gaps) = 19 Alignment score = 0.000000
  ATCCTAATTTTTCATGAGA
>Fam_1313_19_1 Nr. of seq. 1 Alignment length(with gaps) = 19 Alignment score = 0.000000
  AAGAAAGGGATTATGGAGT
>Fam_1314_19_1 Nr. of seq. 1 Alignment length(with gaps) = 19 Alignment score = 0.000000
  TAGATTTTAGGGCTTGTTT
>Fam_1315_19_1 Nr. of seq. 1 Alignment length(with gaps) = 19 Alignment score = 0.000000
  TTAATTGAAGATATTAAG
>Fam_1316_19_1 Nr. of seq. 1 Alignment length(with gaps) = 19 Alignment score = 0.000000
  TAAGTCCTATCAATCTGCA
>Fam_1317_19_1 Nr. of seq. 1 Alignment length(with gaps) = 19 Alignment score = 0.000000
  CTATTTCAAATGACATTCT
>Fam_1318_19_1 Nr. of seq. 1 Alignment length(with gaps) = 19 Alignment score = 0.000000
  ATGTCAAAGTGAAGATAAGG
>Fam_1319_19_1 Nr. of seq. 1 Alignment length(with gaps) = 19 Alignment score = 0.000000
  ATTCTTAAGATCCTAATCA
>Fam_1320_19_1 Nr. of seq. 1 Alignment length(with gaps) = 19 Alignment score = 0.000000
  CCAGTTAAAGTACAGTAAC
>Fam_1321_19_1 Nr. of seq. 1 Alignment length(with gaps) = 19 Alignment score = 0.000000
  CACTACTCAATGTTAAAAT
>Fam_1322_19_1 Nr. of seq. 1 Alignment length(with gaps) = 19 Alignment score = 0.000000
```

GTTACCTTAATACAGATGA  
>Fam\_1323\_19\_1 Nr. of seq. 1 Alignment length(with gaps) = 19 Alignment score = 0.000000  
TAAGGCTAACTGCTGAAAG  
>Fam\_1324\_19\_1 Nr. of seq. 1 Alignment length(with gaps) = 19 Alignment score = 0.000000  
TTTGTTTGAAATCATCTGT  
>Fam\_1325\_19\_1 Nr. of seq. 1 Alignment length(with gaps) = 19 Alignment score = 0.000000  
CTGATAGCAATTCTTTGAT  
>Fam\_1326\_19\_1 Nr. of seq. 1 Alignment length(with gaps) = 19 Alignment score = 0.000000  
TTCAGTTTCAACCTCGACN  
>Fam\_1327\_19\_1 Nr. of seq. 1 Alignment length(with gaps) = 19 Alignment score = 0.000000  
AAATTAATCAGGGGATAC  
>Fam\_1328\_19\_1 Nr. of seq. 1 Alignment length(with gaps) = 19 Alignment score = 0.000000  
ATTCTGTATTCTGGAGGAG  
>Fam\_1329\_19\_1 Nr. of seq. 1 Alignment length(with gaps) = 19 Alignment score = 0.000000  
CTCATATTCAATAATAAAG  
>Fam\_1330\_19\_1 Nr. of seq. 1 Alignment length(with gaps) = 19 Alignment score = 0.000000  
TCCTTCTTTTATCACTTCG  
>Fam\_1331\_19\_1 Nr. of seq. 1 Alignment length(with gaps) = 19 Alignment score = 0.000000  
CAAGTTTCTTAGGAAAGGA  
>Fam\_1332\_19\_1 Nr. of seq. 1 Alignment length(with gaps) = 19 Alignment score = 0.000000  
CTACTCTTAAAATATTCAG  
>Fam\_1333\_19\_1 Nr. of seq. 1 Alignment length(with gaps) = 19 Alignment score = 0.000000  
AAATTTAGACCAGGATAGA  
>Fam\_1334\_19\_1 Nr. of seq. 1 Alignment length(with gaps) = 19 Alignment score = 0.000000  
ATTTTACTATCCATTTACC  
>Fam\_1335\_19\_1 Nr. of seq. 1 Alignment length(with gaps) = 19 Alignment score = 0.000000  
TTACAGGAGATAGATTGAG  
>Fam\_1336\_19\_1 Nr. of seq. 1 Alignment length(with gaps) = 19 Alignment score = 0.000000  
ATATTCCAGTAATTTTACC  
>Fam\_1337\_19\_1 Nr. of seq. 1 Alignment length(with gaps) = 19 Alignment score = 0.000000  
TAATTTTTACATTGTTAAC  
>Fam\_1338\_19\_1 Nr. of seq. 1 Alignment length(with gaps) = 19 Alignment score = 0.000000  
TGGTACGTTGGGAGCACAA  
>Fam\_1339\_19\_1 Nr. of seq. 1 Alignment length(with gaps) = 19 Alignment score = 0.000000  
AATGGCACTCTAAGTACCA  
>Fam\_1340\_19\_1 Nr. of seq. 1 Alignment length(with gaps) = 19 Alignment score = 0.000000  
AAAATAATCCCTGATTCTT  
>Fam\_1341\_19\_1 Nr. of seq. 1 Alignment length(with gaps) = 19 Alignment score = 0.000000

AAATTTGGAAAACCTATAA  
>Fam\_1342\_19\_1 Nr. of seq. 1 Alignment length(with gaps) = 19 Alignment score = 0.000000  
AAAGGAAGGACTAAACAGA  
>Fam\_1343\_19\_1 Nr. of seq. 1 Alignment length(with gaps) = 19 Alignment score = 0.000000  
CTTATCTTGAGAAAGTGAGG  
>Fam\_1344\_19\_1 Nr. of seq. 1 Alignment length(with gaps) = 19 Alignment score = 0.000000  
CTCTTTACATCTTGTTTTG  
>Fam\_1345\_19\_1 Nr. of seq. 1 Alignment length(with gaps) = 19 Alignment score = 0.000000  
TCTAAGCTCATTTTTGTTC  
>Fam\_1346\_19\_1 Nr. of seq. 1 Alignment length(with gaps) = 19 Alignment score = 0.000000  
GGATATCGTTATTTTTGTGC  
>Fam\_1347\_19\_1 Nr. of seq. 1 Alignment length(with gaps) = 19 Alignment score = 0.000000  
TAAATTGAGGTCTTGAAGT  
>Fam\_1348\_19\_1 Nr. of seq. 1 Alignment length(with gaps) = 19 Alignment score = 0.000000  
ATTTAAAGCTAAAATCGGT  
>Fam\_1349\_19\_1 Nr. of seq. 1 Alignment length(with gaps) = 19 Alignment score = 0.000000  
ATCACCGTTATGATTACAA  
>Fam\_1350\_18\_1 Nr. of seq. 1 Alignment length(with gaps) = 18 Alignment score = 0.000000  
GCCGTA CTGTTGTTACT  
>Fam\_1351\_18\_1 Nr. of seq. 1 Alignment length(with gaps) = 18 Alignment score = 0.000000  
GAGGACGACTCCTCCACC  
>Fam\_1352\_18\_1 Nr. of seq. 1 Alignment length(with gaps) = 18 Alignment score = 0.000000  
CTGAGGTTCCAGCTCCGA  
>Fam\_1353\_18\_1 Nr. of seq. 1 Alignment length(with gaps) = 18 Alignment score = 0.000000  
TGGAATTATTTGGTTAAG  
>Fam\_1354\_18\_1 Nr. of seq. 1 Alignment length(with gaps) = 18 Alignment score = 0.000000  
AGTTAGA ACTAGAATTAG  
>Fam\_1355\_18\_1 Nr. of seq. 1 Alignment length(with gaps) = 18 Alignment score = 0.000000  
TCATCGACTACTACGTCG  
>Fam\_1356\_18\_1 Nr. of seq. 1 Alignment length(with gaps) = 18 Alignment score = 0.000000  
GTGGTAGGTACAATAGGT  
>Fam\_1357\_18\_1 Nr. of seq. 1 Alignment length(with gaps) = 18 Alignment score = 0.000000  
TCCCGTTCCACATTCAT  
>Fam\_1358\_18\_1 Nr. of seq. 1 Alignment length(with gaps) = 18 Alignment score = 0.000000  
CCTGTATTCTCATGCTTC  
>Fam\_1359\_18\_1 Nr. of seq. 1 Alignment length(with gaps) = 18 Alignment score = 0.000000  
TTAGGAAGATCTCCAATA  
>Fam\_1360\_18\_1 Nr. of seq. 1 Alignment length(with gaps) = 18 Alignment score = 0.000000

TATGCAGCTACCTCCGTA  
>Fam\_1361\_18\_1 Nr. of seq. 1 Alignment length(with gaps) = 18 Alignment score = 0.000000  
TTTTTTGTGAACACGATT  
>Fam\_1362\_18\_1 Nr. of seq. 1 Alignment length(with gaps) = 18 Alignment score = 0.000000  
ATAGTGACCCAGAATCAA  
>Fam\_1363\_18\_1 Nr. of seq. 1 Alignment length(with gaps) = 18 Alignment score = 0.000000  
TTACCAGTTTTAGGCTTT  
>Fam\_1364\_18\_1 Nr. of seq. 1 Alignment length(with gaps) = 18 Alignment score = 0.000000  
CTGTAACTCTACCAATT  
>Fam\_1365\_18\_1 Nr. of seq. 1 Alignment length(with gaps) = 18 Alignment score = 0.000000  
CTCTTCATCAACAGTGTT  
>Fam\_1366\_18\_1 Nr. of seq. 1 Alignment length(with gaps) = 18 Alignment score = 0.000000  
GTGATTTCCGTGATTTCT  
>Fam\_1367\_18\_1 Nr. of seq. 1 Alignment length(with gaps) = 18 Alignment score = 0.000000  
CAAGGTCATACAGGTTTG  
>Fam\_1368\_18\_1 Nr. of seq. 1 Alignment length(with gaps) = 18 Alignment score = 0.000000  
TTCCTTAGACTCCATAGA  
>Fam\_1369\_18\_1 Nr. of seq. 1 Alignment length(with gaps) = 18 Alignment score = 0.000000  
AGATAATCAACTTCGAGC  
>Fam\_1370\_18\_1 Nr. of seq. 1 Alignment length(with gaps) = 18 Alignment score = 0.000000  
TTGGAGTATCCAGAGTGT  
>Fam\_1371\_18\_1 Nr. of seq. 1 Alignment length(with gaps) = 18 Alignment score = 0.000000  
AATACCACATTCTGTCA  
>Fam\_1372\_18\_1 Nr. of seq. 1 Alignment length(with gaps) = 18 Alignment score = 0.000000  
CAGTATTCTATATTAGAC  
>Fam\_1373\_18\_1 Nr. of seq. 1 Alignment length(with gaps) = 18 Alignment score = 0.000000  
TTATTTACACAAGTCTCTC  
>Fam\_1374\_18\_1 Nr. of seq. 1 Alignment length(with gaps) = 18 Alignment score = 0.000000  
CTGAGTCCAGTACGTTTA  
>Fam\_1375\_18\_1 Nr. of seq. 1 Alignment length(with gaps) = 18 Alignment score = 0.000000  
GAATTGACCTGCTTCAGA  
>Fam\_1376\_18\_1 Nr. of seq. 1 Alignment length(with gaps) = 18 Alignment score = 0.000000  
TGTTGAAACACCTGCAAA  
>Fam\_1377\_18\_1 Nr. of seq. 1 Alignment length(with gaps) = 18 Alignment score = 0.000000  
TCTTGAGCTGCCGCTACT  
>Fam\_1378\_18\_1 Nr. of seq. 1 Alignment length(with gaps) = 18 Alignment score = 0.000000  
TCCAGTTTTCGGCTTCAAT  
>Fam\_1379\_18\_1 Nr. of seq. 1 Alignment length(with gaps) = 18 Alignment score = 0.000000

ACCGGATTTGATTTAAAC

>Fam\_1380\_18\_1 Nr. of seq. 1 Alignment length(with gaps) = 18 Alignment score = 0.000000  
GAAGAACTTGAAGATGTC

>Fam\_1381\_18\_1 Nr. of seq. 1 Alignment length(with gaps) = 18 Alignment score = 0.000000  
ACTGTATAATCTGGCTGC

>Fam\_1382\_18\_1 Nr. of seq. 1 Alignment length(with gaps) = 18 Alignment score = 0.000000  
CAGATGCAGGTNCAGGTG

>Fam\_1383\_18\_1 Nr. of seq. 1 Alignment length(with gaps) = 18 Alignment score = 0.000000  
ACAAAAAGATTACGCAAA

>Fam\_1384\_18\_1 Nr. of seq. 1 Alignment length(with gaps) = 18 Alignment score = 0.000000  
AAACTTGGTTGTAAATCGG

>Fam\_1385\_18\_1 Nr. of seq. 1 Alignment length(with gaps) = 18 Alignment score = 0.000000  
GAACCTGAACTAAGACTT

>Fam\_1386\_18\_1 Nr. of seq. 1 Alignment length(with gaps) = 18 Alignment score = 0.000000  
TGGAATGGTGCTACACCC

>Fam\_1387\_18\_1 Nr. of seq. 1 Alignment length(with gaps) = 18 Alignment score = 0.000000  
CGTTTATTGACATTCTGC

>Fam\_1388\_18\_1 Nr. of seq. 1 Alignment length(with gaps) = 18 Alignment score = 0.000000  
TGGTGCAGAAGCCGGTGT

>Fam\_1389\_18\_1 Nr. of seq. 1 Alignment length(with gaps) = 18 Alignment score = 0.000000  
TTTATAAGAAAGGTTCGA

>Fam\_1390\_18\_1 Nr. of seq. 1 Alignment length(with gaps) = 18 Alignment score = 0.000000  
TTCAACCGGAGTTACAGT

>Fam\_1391\_18\_1 Nr. of seq. 1 Alignment length(with gaps) = 18 Alignment score = 0.000000  
CAGATTGATCATCGAACC

>Fam\_1392\_18\_1 Nr. of seq. 1 Alignment length(with gaps) = 18 Alignment score = 0.000000  
CACTTGCCTTTCCAGTCA

>Fam\_1393\_18\_1 Nr. of seq. 1 Alignment length(with gaps) = 18 Alignment score = 0.000000  
GAATCTTCGTTGGAGGAA

>Fam\_1394\_18\_1 Nr. of seq. 1 Alignment length(with gaps) = 18 Alignment score = 0.000000  
AATAACTCTCATTTCTCTC

>Fam\_1395\_18\_1 Nr. of seq. 1 Alignment length(with gaps) = 18 Alignment score = 0.000000  
TGTTTTATTTCCAGATCC

>Fam\_1396\_18\_1 Nr. of seq. 1 Alignment length(with gaps) = 18 Alignment score = 0.000000  
TTTAGTAAGACTGTTCTG

>Fam\_1397\_18\_1 Nr. of seq. 1 Alignment length(with gaps) = 18 Alignment score = 0.000000  
CTGGATTCTCTTTTCTG

>Fam\_1398\_18\_1 Nr. of seq. 1 Alignment length(with gaps) = 18 Alignment score = 0.000000

```
ATTTTTAAAAAGCTAACC
>Fam_1399_18_1 Nr. of seq. 1 Alignment length(with gaps) = 18 Alignment score = 0.000000
ACAGTTTTTCACATTCAGA
>Fam_1400_18_1 Nr. of seq. 1 Alignment length(with gaps) = 18 Alignment score = 0.000000
CAAATGATGCTGGAATAT
>Fam_1401_18_1 Nr. of seq. 1 Alignment length(with gaps) = 18 Alignment score = 0.000000
GATAAACTTCCATACCCG
>Fam_1402_18_1 Nr. of seq. 1 Alignment length(with gaps) = 18 Alignment score = 0.000000
ATTAAACTCGACAATTCA
>Fam_1403_18_1 Nr. of seq. 1 Alignment length(with gaps) = 18 Alignment score = 0.000000
TGAATGAGACGGTAGCTC
>Fam_1404_18_1 Nr. of seq. 1 Alignment length(with gaps) = 18 Alignment score = 0.000000
CGGGTTTCGTACCCGTTGT
>Fam_1405_18_1 Nr. of seq. 1 Alignment length(with gaps) = 18 Alignment score = 0.000000
GCCGTCGTTCGGCTGGAT
>Fam_1406_18_1 Nr. of seq. 1 Alignment length(with gaps) = 18 Alignment score = 0.000000
CGGTTTCGGGCTCGGAGT
>Fam_1407_18_1 Nr. of seq. 1 Alignment length(with gaps) = 18 Alignment score = 0.000000
GAGAACGGCGCCGACGAC
>Fam_1408_18_1 Nr. of seq. 1 Alignment length(with gaps) = 18 Alignment score = 0.000000
CCACCATCTCCTCCGCGT
>Fam_1409_18_1 Nr. of seq. 1 Alignment length(with gaps) = 18 Alignment score = 0.000000
GTTTGGTTTCCGTAGTC
>Fam_1410_18_1 Nr. of seq. 1 Alignment length(with gaps) = 18 Alignment score = 0.000000
TTGTGGTAGTTGAAGTAC
>Fam_1411_18_1 Nr. of seq. 1 Alignment length(with gaps) = 18 Alignment score = 0.000000
GCTTGCTGGTTGTNGTCG
>Fam_1412_18_1 Nr. of seq. 1 Alignment length(with gaps) = 18 Alignment score = 0.000000
ACTACAAGTACCACCGAA
>Fam_1413_17_1 Nr. of seq. 1 Alignment length(with gaps) = 17 Alignment score = 0.000000
TCATCCGTTTCGAGCGCA
>Fam_1414_17_1 Nr. of seq. 1 Alignment length(with gaps) = 17 Alignment score = 0.000000
CGCGATCACACGTCAC
>Fam_1415_17_1 Nr. of seq. 1 Alignment length(with gaps) = 17 Alignment score = 0.000000
ACCTCCGCTCGTACTGC
>Fam_1416_17_1 Nr. of seq. 1 Alignment length(with gaps) = 17 Alignment score = 0.000000
TAAGTAAAATACATGCT
>Fam_1417_17_1 Nr. of seq. 1 Alignment length(with gaps) = 17 Alignment score = 0.000000
```

TGCATTTTGAGTACGGT  
>Fam\_1418\_17\_1 Nr. of seq. 1 Alignment length(with gaps) = 17 Alignment score = 0.000000  
TTTGTGTAATTGACCCG  
>Fam\_1419\_17\_1 Nr. of seq. 1 Alignment length(with gaps) = 17 Alignment score = 0.000000  
TAGTTTTTGTGTGATAG  
>Fam\_1420\_17\_1 Nr. of seq. 1 Alignment length(with gaps) = 17 Alignment score = 0.000000  
AGAAGAGTTTTGAGTTA  
>Fam\_1421\_17\_1 Nr. of seq. 1 Alignment length(with gaps) = 17 Alignment score = 0.000000  
TATGTCTATTATCCGAT  
>Fam\_1422\_17\_1 Nr. of seq. 1 Alignment length(with gaps) = 17 Alignment score = 0.000000  
ACCGAATGAGTCCAGTC  
>Fam\_1423\_17\_1 Nr. of seq. 1 Alignment length(with gaps) = 17 Alignment score = 0.000000  
CTACAGGTAAAGTAATT  
>Fam\_1424\_17\_1 Nr. of seq. 1 Alignment length(with gaps) = 17 Alignment score = 0.000000  
AACGAAGTTATTCCATG  
>Fam\_1425\_17\_1 Nr. of seq. 1 Alignment length(with gaps) = 17 Alignment score = 0.000000  
TTAGAGAGAAGTAAGCT  
>Fam\_1426\_17\_1 Nr. of seq. 1 Alignment length(with gaps) = 17 Alignment score = 0.000000  
GAATGAGATGATCTAAA  
>Fam\_1427\_17\_1 Nr. of seq. 1 Alignment length(with gaps) = 17 Alignment score = 0.000000  
ACATAAACCAACCAACN  
>Fam\_1428\_17\_1 Nr. of seq. 1 Alignment length(with gaps) = 17 Alignment score = 0.000000  
AAAATCAAAGTAAGTCG  
>Fam\_1429\_17\_1 Nr. of seq. 1 Alignment length(with gaps) = 17 Alignment score = 0.000000  
ACCCTGTTTCTAAAGTT  
>Fam\_1430\_17\_1 Nr. of seq. 1 Alignment length(with gaps) = 17 Alignment score = 0.000000  
TAATATTCTGNFTNCTC  
>Fam\_1431\_17\_1 Nr. of seq. 1 Alignment length(with gaps) = 17 Alignment score = 0.000000  
TATTTACAGAGAGATT  
>Fam\_1432\_17\_1 Nr. of seq. 1 Alignment length(with gaps) = 17 Alignment score = 0.000000  
AAAAGATGTGGATCAGG  
>Fam\_1433\_17\_1 Nr. of seq. 1 Alignment length(with gaps) = 17 Alignment score = 0.000000  
CTGATTTGGCTTACTGA  
>Fam\_1434\_17\_1 Nr. of seq. 1 Alignment length(with gaps) = 17 Alignment score = 0.000000  
CCAACTAACTATACTGA  
>Fam\_1435\_17\_1 Nr. of seq. 1 Alignment length(with gaps) = 17 Alignment score = 0.000000  
GTTTCCTACTAGTTTCA  
>Fam\_1436\_17\_1 Nr. of seq. 1 Alignment length(with gaps) = 17 Alignment score = 0.000000



TTTCTTTAAAGGTACGA  
>Fam\_1437\_17\_1 Nr. of seq. 1 Alignment length(with gaps) = 17 Alignment score = 0.000000  
TTCTTTATCGTCTTGTA  
>Fam\_1438\_17\_1 Nr. of seq. 1 Alignment length(with gaps) = 17 Alignment score = 0.000000  
AGGAATCAATCATTTTC  
>Fam\_1439\_17\_1 Nr. of seq. 1 Alignment length(with gaps) = 17 Alignment score = 0.000000  
TCAATTTGTTCCGGATC  
>Fam\_1440\_17\_1 Nr. of seq. 1 Alignment length(with gaps) = 17 Alignment score = 0.000000  
AGTGGAAGCTGTGTATT  
>Fam\_1441\_17\_1 Nr. of seq. 1 Alignment length(with gaps) = 17 Alignment score = 0.000000  
GCATTGAGTTTTCTAAC  
>Fam\_1442\_17\_1 Nr. of seq. 1 Alignment length(with gaps) = 17 Alignment score = 0.000000  
TCATCGTCCATCATACG  
>Fam\_1443\_16\_1 Nr. of seq. 1 Alignment length(with gaps) = 16 Alignment score = 0.000000  
AAAATCTATGCTGCAA  
>Fam\_1444\_16\_1 Nr. of seq. 1 Alignment length(with gaps) = 16 Alignment score = 0.000000  
CAACTTTATTTGACTG  
>Fam\_1445\_16\_1 Nr. of seq. 1 Alignment length(with gaps) = 16 Alignment score = 0.000000  
CTGTTGTTAAACGAAG  
>Fam\_1446\_16\_1 Nr. of seq. 1 Alignment length(with gaps) = 16 Alignment score = 0.000000  
TATCCTTAGATACTCC  
>Fam\_1447\_16\_1 Nr. of seq. 1 Alignment length(with gaps) = 16 Alignment score = 0.000000  
GGAATTGACACATTAT  
>Fam\_1448\_16\_1 Nr. of seq. 1 Alignment length(with gaps) = 16 Alignment score = 0.000000  
AATTGATAATTGGACT  
>Fam\_1449\_16\_1 Nr. of seq. 1 Alignment length(with gaps) = 16 Alignment score = 0.000000  
TGCCCACTCGCTTGTT  
>Fam\_1450\_16\_1 Nr. of seq. 1 Alignment length(with gaps) = 16 Alignment score = 0.000000  
TTTTGGGATAAAAATAC  
>Fam\_1451\_16\_1 Nr. of seq. 1 Alignment length(with gaps) = 16 Alignment score = 0.000000  
TCCTCGTCTTCTGCGA  
>Fam\_1452\_16\_1 Nr. of seq. 1 Alignment length(with gaps) = 16 Alignment score = 0.000000  
TTGAACACTCCTAACG  
>Fam\_1453\_16\_1 Nr. of seq. 1 Alignment length(with gaps) = 16 Alignment score = 0.000000  
GGCTGTAAACAGATCA  
>Fam\_1454\_16\_1 Nr. of seq. 1 Alignment length(with gaps) = 16 Alignment score = 0.000000  
GCCATTATCTCAAGTT  
>Fam\_1455\_16\_1 Nr. of seq. 1 Alignment length(with gaps) = 16 Alignment score = 0.000000

TTCTAATGGAATCTAT  
>Fam\_1456\_16\_1 Nr. of seq. 1 Alignment length(with gaps) = 16 Alignment score = 0.000000  
ACACTTCTAATCCAGC  
>Fam\_1457\_16\_1 Nr. of seq. 1 Alignment length(with gaps) = 16 Alignment score = 0.000000  
TTCAAACAGTTAATAN  
>Fam\_1458\_16\_1 Nr. of seq. 1 Alignment length(with gaps) = 16 Alignment score = 0.000000  
GTTCTGAAGCGTATAA  
>Fam\_1459\_16\_1 Nr. of seq. 1 Alignment length(with gaps) = 16 Alignment score = 0.000000  
TTATAGATCTACGATG  
>Fam\_1460\_16\_1 Nr. of seq. 1 Alignment length(with gaps) = 16 Alignment score = 0.000000  
CCAAATCATATTCTTC  
>Fam\_1461\_16\_1 Nr. of seq. 1 Alignment length(with gaps) = 16 Alignment score = 0.000000  
ACATGGGATTAGAAAC  
>Fam\_1462\_16\_1 Nr. of seq. 1 Alignment length(with gaps) = 16 Alignment score = 0.000000  
CTTTAGTCCTTAGTAG  
>Fam\_1463\_16\_1 Nr. of seq. 1 Alignment length(with gaps) = 16 Alignment score = 0.000000  
ACTCGCAGCCAACAGT  
>Fam\_1464\_15\_1 Nr. of seq. 1 Alignment length(with gaps) = 15 Alignment score = 0.000000  
GACCGGACCAACACC  
>Fam\_1465\_15\_1 Nr. of seq. 1 Alignment length(with gaps) = 15 Alignment score = 0.000000  
ACGACGGCGACAGGA  
>Fam\_1466\_15\_1 Nr. of seq. 1 Alignment length(with gaps) = 15 Alignment score = 0.000000  
CCGACCTGCGAGAGA  
>Fam\_1467\_15\_1 Nr. of seq. 1 Alignment length(with gaps) = 15 Alignment score = 0.000000  
TCCGGCCGATCGCTC  
>Fam\_1468\_15\_1 Nr. of seq. 1 Alignment length(with gaps) = 15 Alignment score = 0.000000  
AGTGGGGAGCAGGGA  
>Fam\_1469\_15\_1 Nr. of seq. 1 Alignment length(with gaps) = 15 Alignment score = 0.000000  
CTGAGTACCCGGAGC  
>Fam\_1470\_15\_1 Nr. of seq. 1 Alignment length(with gaps) = 15 Alignment score = 0.000000  
TTACGAACCATCGCG  
>Fam\_1471\_15\_1 Nr. of seq. 1 Alignment length(with gaps) = 15 Alignment score = 0.000000  
TTATCCGAACCATTT  
>Fam\_1472\_15\_1 Nr. of seq. 1 Alignment length(with gaps) = 15 Alignment score = 0.000000  
ACCGTG TAGAGTCAT  
>Fam\_1473\_15\_1 Nr. of seq. 1 Alignment length(with gaps) = 15 Alignment score = 0.000000  
GCTAACCTTCATCTG  
>Fam\_1474\_15\_1 Nr. of seq. 1 Alignment length(with gaps) = 15 Alignment score = 0.000000

GTATCATAGGATCTA

>Fam\_1475\_15\_1 Nr. of seq. 1 Alignment length(with gaps) = 15 Alignment score = 0.000000

TTTAGCCATCGTTAT

>Fam\_1476\_15\_1 Nr. of seq. 1 Alignment length(with gaps) = 15 Alignment score = 0.000000

TTTGGGCTGTAAACC

>Fam\_1477\_15\_1 Nr. of seq. 1 Alignment length(with gaps) = 15 Alignment score = 0.000000

CTTAATAGTCTATGG

>Fam\_1478\_15\_1 Nr. of seq. 1 Alignment length(with gaps) = 15 Alignment score = 0.000000

CCATGAGCATTATTC

>Fam\_1479\_15\_1 Nr. of seq. 1 Alignment length(with gaps) = 15 Alignment score = 0.000000

AGTAAAAGTGCATTC

>Fam\_1480\_15\_1 Nr. of seq. 1 Alignment length(with gaps) = 15 Alignment score = 0.000000

GCTTTCATCGATCTC

>Fam\_1481\_15\_1 Nr. of seq. 1 Alignment length(with gaps) = 15 Alignment score = 0.000000

TAACAGCAAAACTCG

>Fam\_1482\_15\_1 Nr. of seq. 1 Alignment length(with gaps) = 15 Alignment score = 0.000000

TGTAGGACTTGCACT

>Fam\_1483\_15\_1 Nr. of seq. 1 Alignment length(with gaps) = 15 Alignment score = 0.000000

CCTGAAGAGAAGCCT

>Fam\_1484\_15\_1 Nr. of seq. 1 Alignment length(with gaps) = 15 Alignment score = 0.000000

ATCTTCAGGTACCGT

>Fam\_1485\_15\_1 Nr. of seq. 1 Alignment length(with gaps) = 15 Alignment score = 0.000000

CTCTTTTTTCAGAGAC

>Fam\_1486\_15\_1 Nr. of seq. 1 Alignment length(with gaps) = 15 Alignment score = 0.000000

CAGGAAGAAGAGCCG

>Fam\_1487\_15\_1 Nr. of seq. 1 Alignment length(with gaps) = 15 Alignment score = 0.000000

TACTCTGTTGCATTC

>Fam\_1488\_15\_1 Nr. of seq. 1 Alignment length(with gaps) = 15 Alignment score = 0.000000

TGGTTATAAATTAGC

>Fam\_1489\_15\_1 Nr. of seq. 1 Alignment length(with gaps) = 15 Alignment score = 0.000000

TCTGTTACAAATAAC

>Fam\_1490\_15\_1 Nr. of seq. 1 Alignment length(with gaps) = 15 Alignment score = 0.000000

CGAAGCTTATCTGAC

>Fam\_1491\_15\_1 Nr. of seq. 1 Alignment length(with gaps) = 15 Alignment score = 0.000000

TATTGGAAGGGTCTT

>Fam\_1492\_15\_1 Nr. of seq. 1 Alignment length(with gaps) = 15 Alignment score = 0.000000

TACGGAAATAACACC

>Fam\_1493\_15\_1 Nr. of seq. 1 Alignment length(with gaps) = 15 Alignment score = 0.000000

CACAGATCCACAGAC  
>Fam\_1494\_15\_1 Nr. of seq. 1 Alignment length(with gaps) = 15 Alignment score = 0.000000  
GTGGGATGTGAGAGT  
>Fam\_1495\_15\_1 Nr. of seq. 1 Alignment length(with gaps) = 15 Alignment score = 0.000000  
TTCGGCGTCTTCGAT  
>Fam\_1496\_14\_1 Nr. of seq. 1 Alignment length(with gaps) = 14 Alignment score = 0.000000  
GCGTCCC GCGT CCT  
>Fam\_1497\_14\_1 Nr. of seq. 1 Alignment length(with gaps) = 14 Alignment score = 0.000000  
GGCAGGTCGTAAGC  
>Fam\_1498\_14\_1 Nr. of seq. 1 Alignment length(with gaps) = 14 Alignment score = 0.000000  
CTGAGGGAGAGAGC  
>Fam\_1499\_14\_1 Nr. of seq. 1 Alignment length(with gaps) = 14 Alignment score = 0.000000  
AAGAAAGATCTGCC  
>Fam\_1500\_14\_1 Nr. of seq. 1 Alignment length(with gaps) = 14 Alignment score = 0.000000  
TTCGTGAGCACTTA  
>Fam\_1501\_14\_1 Nr. of seq. 1 Alignment length(with gaps) = 14 Alignment score = 0.000000  
ATAGAGTCACCATC  
>Fam\_1502\_14\_1 Nr. of seq. 1 Alignment length(with gaps) = 14 Alignment score = 0.000000  
TTTTGTTGCACTGC  
>Fam\_1503\_14\_1 Nr. of seq. 1 Alignment length(with gaps) = 14 Alignment score = 0.000000  
GTATGAAAATGACC  
>Fam\_1504\_14\_1 Nr. of seq. 1 Alignment length(with gaps) = 14 Alignment score = 0.000000  
ACCAGTTGGATTTT  
>Fam\_1505\_14\_1 Nr. of seq. 1 Alignment length(with gaps) = 14 Alignment score = 0.000000  
AACTCGGGAAGCGA  
>Fam\_1506\_14\_1 Nr. of seq. 1 Alignment length(with gaps) = 14 Alignment score = 0.000000  
TCACATTACGTTTC  
>Fam\_1507\_14\_1 Nr. of seq. 1 Alignment length(with gaps) = 14 Alignment score = 0.000000  
CTTATTATTCCACT  
>Fam\_1508\_14\_1 Nr. of seq. 1 Alignment length(with gaps) = 14 Alignment score = 0.000000  
TGGTATTTATGAGT  
>Fam\_1509\_14\_1 Nr. of seq. 1 Alignment length(with gaps) = 14 Alignment score = 0.000000  
AGATTACTGAGCAG  
>Fam\_1510\_14\_1 Nr. of seq. 1 Alignment length(with gaps) = 14 Alignment score = 0.000000  
AATCAAAA ACTGCG  
>Fam\_1511\_14\_1 Nr. of seq. 1 Alignment length(with gaps) = 14 Alignment score = 0.000000  
TCACATAGAATCTG  
>Fam\_1512\_14\_1 Nr. of seq. 1 Alignment length(with gaps) = 14 Alignment score = 0.000000

```

TAGCTGTAGCTCGG
>Fam_1513_13_1 Nr. of seq. 1 Alignment length(with gaps) = 13 Alignment score = 0.000000
CCAGTCAGCTTTC
>Fam_1514_13_1 Nr. of seq. 1 Alignment length(with gaps) = 13 Alignment score = 0.000000
AGTTTAGCAGGCA
>Fam_1515_13_1 Nr. of seq. 1 Alignment length(with gaps) = 13 Alignment score = 0.000000
ATCACTATTTCTA
>Fam_1516_13_1 Nr. of seq. 1 Alignment length(with gaps) = 13 Alignment score = 0.000000
TGTCAGCTATTGA
>Fam_1517_13_1 Nr. of seq. 1 Alignment length(with gaps) = 13 Alignment score = 0.000000
TTATAGTGAATTT
>Fam_1518_13_1 Nr. of seq. 1 Alignment length(with gaps) = 13 Alignment score = 0.000000
TTGCACTCACACC
>Fam_1519_13_1 Nr. of seq. 1 Alignment length(with gaps) = 13 Alignment score = 0.000000
TCTTTTATAAGTG
>Fam_1520_13_1 Nr. of seq. 1 Alignment length(with gaps) = 13 Alignment score = 0.000000
AAAACGAAATCCG
>Fam_1521_13_1 Nr. of seq. 1 Alignment length(with gaps) = 13 Alignment score = 0.000000
AACAGATCACTAA
>Fam_1522_13_1 Nr. of seq. 1 Alignment length(with gaps) = 13 Alignment score = 0.000000
TTAGGTTTTATGC
>Fam_1523_12_1 Nr. of seq. 1 Alignment length(with gaps) = 12 Alignment score = 0.000000
TCGACGGTCTGT
>Fam_1524_12_1 Nr. of seq. 1 Alignment length(with gaps) = 12 Alignment score = 0.000000
GTGTCAGTCGGN
>Fam_1525_12_1 Nr. of seq. 1 Alignment length(with gaps) = 12 Alignment score = 0.000000
TGTACTIONCATG
>Fam_1526_12_1 Nr. of seq. 1 Alignment length(with gaps) = 12 Alignment score = 0.000000
AACTCGGGCCGT
>Fam_1527_12_1 Nr. of seq. 1 Alignment length(with gaps) = 12 Alignment score = 0.000000
GGTTTAAAATNG
>Fam_1528_12_1 Nr. of seq. 1 Alignment length(with gaps) = 12 Alignment score = 0.000000
GAGAGGGTGTGT
>Fam_1529_12_1 Nr. of seq. 1 Alignment length(with gaps) = 12 Alignment score = 0.000000
TTCCTCTCCGAA
>Fam_1530_12_1 Nr. of seq. 1 Alignment length(with gaps) = 12 Alignment score = 0.000000
TGTGCCCGACTT
>Fam_1531_12_1 Nr. of seq. 1 Alignment length(with gaps) = 12 Alignment score = 0.000000

```

```
TTGCTCCCTCAA
>Fam_1532_12_1 Nr. of seq. 1 Alignment length(with gaps) = 12 Alignment score = 0.000000
ACTTGCTAATCG
>Fam_1533_12_1 Nr. of seq. 1 Alignment length(with gaps) = 12 Alignment score = 0.000000
ACAGGTGCAGGG
>Fam_1534_11_1 Nr. of seq. 1 Alignment length(with gaps) = 11 Alignment score = 0.000000
TTATCAAAGTG
>Fam_1535_11_1 Nr. of seq. 1 Alignment length(with gaps) = 11 Alignment score = 0.000000
AGGAATGAGAC
>Fam_1536_11_1 Nr. of seq. 1 Alignment length(with gaps) = 11 Alignment score = 0.000000
AAATTCACAGC
>Fam_1537_10_1 Nr. of seq. 1 Alignment length(with gaps) = 10 Alignment score = 0.000000
ACCTTACCTC
>Fam_1538_10_1 Nr. of seq. 1 Alignment length(with gaps) = 10 Alignment score = 0.000000
GCACCACAAC
>Fam_1539_10_1 Nr. of seq. 1 Alignment length(with gaps) = 10 Alignment score = 0.000000
AGATCCCAGG
>Fam_1540_10_1 Nr. of seq. 1 Alignment length(with gaps) = 10 Alignment score = 0.000000
TAATTTACTC
>Fam_1541_10_1 Nr. of seq. 1 Alignment length(with gaps) = 10 Alignment score = 0.000000
GCGGGCAGTC
```

## Table S6b. Bacteria satellite families

>Fam\_1\_14\_23 Nr. of seq. 23 Alignment length(with gaps) = 16 Alignment score = 0.673254  
GATAGaAgATAGGA

>Fam\_2\_14\_12 Nr. of seq. 12 Alignment length(with gaps) = 16 Alignment score = 0.641256  
CGGCAagCGGCAaG

>Fam\_3\_12\_12 Nr. of seq. 12 Alignment length(with gaps) = 13 Alignment score = 0.636364  
CAAcAaGCAAnaG

>Fam\_4\_14\_11 Nr. of seq. 11 Alignment length(with gaps) = 16 Alignment score = 0.636364  
GaGgCGCGaGgCGC

>Fam\_5\_12\_10 Nr. of seq. 10 Alignment length(with gaps) = 14 Alignment score = 0.652910  
GctgGTGctgGT

>Fam\_6\_14\_10 Nr. of seq. 10 Alignment length(with gaps) = 14 Alignment score = 0.860317  
tCGGGAAtcGGGAA

>Fam\_7\_20\_9 Nr. of seq. 9 Alignment length(with gaps) = 22 Alignment score = 0.613216  
GATATAttTnGAganTCGct

>Fam\_8\_18\_9 Nr. of seq. 9 Alignment length(with gaps) = 18 Alignment score = 0.754630  
GAcAGcGAcTCnGAcTCa

>Fam\_9\_15\_9 Nr. of seq. 9 Alignment length(with gaps) = 16 Alignment score = 0.837963  
CGCGCcGGCCAGGTT

>Fam\_10\_16\_9 Nr. of seq. 9 Alignment length(with gaps) = 16 Alignment score = 0.814815  
GCcGAaCCGCcGAaCC

>Fam\_11\_14\_9 Nr. of seq. 9 Alignment length(with gaps) = 14 Alignment score = 0.809524  
AGctAcAAGctAcA

>Fam\_12\_12\_9 Nr. of seq. 9 Alignment length(with gaps) = 13 Alignment score = 0.638177  
CcgACGCcgACg

>Fam\_13\_96\_8 Nr. of seq. 8 Alignment length(with gaps) = 111 Alignment score = 0.661197  
CGCGcAAAGCcGCcGTcGAAGCcGCTATtGCCCGcGCCAAAGCaCGcAAGctGGAaCAGcaaCAGGctaAtGCgGAACCaGaaGAACaGGTCGAtC

>Fam\_14\_39\_8 Nr. of seq. 8 Alignment length(with gaps) = 39 Alignment score = 0.941392  
GGCTGCTGATActGCgGCTGCGGCGCaACCGGtTGTTGC

>Fam\_15\_14\_8 Nr. of seq. 8 Alignment length(with gaps) = 14 Alignment score = 0.746599  
gCcGAACGCcGAac

>Fam\_16\_14\_8 Nr. of seq. 8 Alignment length(with gaps) = 14 Alignment score = 0.720663  
cTAGAAcCTAGAAC

>Fam\_17\_100\_7 Nr. of seq. 7 Alignment length(with gaps) = 108 Alignment score = 0.661817  
GGATGCGGCGTgAACGCCTTATCCGGCCTACGgatGGCgCnaGAaTnTGTAGGCcTGATAAgacGCGntAGCgtcGCATCAGGCATntGgCaCnAtTGCC

>Fam\_18\_14\_7 Nr. of seq. 7 Alignment length(with gaps) = 16 Alignment score = 0.646825

```

cATCGCAcATCGCA
>Fam_19_16_7 Nr. of seq. 7 Alignment length(with gaps) = 16 Alignment score = 0.904762
gTAGGGGAgTAGGGGA
>Fam_20_12_7 Nr. of seq. 7 Alignment length(with gaps) = 14 Alignment score = 0.688209
GCTTCGtCtTCg
>Fam_21_12_7 Nr. of seq. 7 Alignment length(with gaps) = 14 Alignment score = 0.664399
TGGCTCTGGctC
>Fam_22_14_7 Nr. of seq. 7 Alignment length(with gaps) = 14 Alignment score = 0.746032
GAGcCGtGAGcCGt
>Fam_23_69_6 Nr. of seq. 6 Alignment length(with gaps) = 70 Alignment score = 0.773651
ACAGAATTAGGAATtGTAActGATGTTAAACCAGAACAAntGcAAAAGCaCCaTcTCCAATAGtAGTC
>Fam_24_46_6 Nr. of seq. 6 Alignment length(with gaps) = 51 Alignment score = 0.627233
TGTGGGAActCTTACAAATTGaGATTTTACggttaAACTTTAAaT
>Fam_25_46_6 Nr. of seq. 6 Alignment length(with gaps) = 49 Alignment score = 0.650340
ACAtTTTtagAAgTttnaCTGTAAAaTCacGaTTTGTGGTAGTTCCC
>Fam_26_37_6 Nr. of seq. 6 Alignment length(with gaps) = 38 Alignment score = 0.693567
cAaAACGCTtTccTATGGgTCGCGTTgGaaAACTCAg
>Fam_27_14_6 Nr. of seq. 6 Alignment length(with gaps) = 16 Alignment score = 0.728472
CCgGTcGCCgGTCG
>Fam_28_15_6 Nr. of seq. 6 Alignment length(with gaps) = 15 Alignment score = 0.717037
GCCGatGTTGnCGnt
>Fam_29_14_6 Nr. of seq. 6 Alignment length(with gaps) = 14 Alignment score = 0.692064
CCAcCGACCAcCGA
>Fam_30_12_6 Nr. of seq. 6 Alignment length(with gaps) = 12 Alignment score = 0.644444
gntGCCGCCGCC
>Fam_31_69_5 Nr. of seq. 5 Alignment length(with gaps) = 70 Alignment score = 0.729048
tgtAAATTcTgtAgTTGTCCnATTTCTtTnGGAAgnGttGTGAGTtGGTTATnatnCAAATncAAcnnT
>Fam_32_45_5 Nr. of seq. 5 Alignment length(with gaps) = 45 Alignment score = 0.911111
CTgACTTCGTCAGTTctATctgCAACCTCAAAACaGTGTTTTGAg
>Fam_33_30_5 Nr. of seq. 5 Alignment length(with gaps) = 30 Alignment score = 0.698889
CCGCTGCCcacaTTGgnGnTaCCGntgTTt
>Fam_34_15_5 Nr. of seq. 5 Alignment length(with gaps) = 17 Alignment score = 0.698039
gtAGGGGCGGGTTtg
>Fam_35_14_5 Nr. of seq. 5 Alignment length(with gaps) = 16 Alignment score = 0.725000
cGTTTGGcGTTTGG
>Fam_36_16_5 Nr. of seq. 5 Alignment length(with gaps) = 16 Alignment score = 0.716667
GCaCgaCnGCACGAcc
>Fam_37_14_5 Nr. of seq. 5 Alignment length(with gaps) = 15 Alignment score = 0.728889

```



```

cggGCGTcgGGCGT
>Fam_38_13_5 Nr. of seq. 5 Alignment length(with gaps) = 14 Alignment score = 0.711905
  CCCGCACCCGcAn
>Fam_39_14_5 Nr. of seq. 5 Alignment length(with gaps) = 14 Alignment score = 0.723810
  nCCaAGCnCCaAGC
>Fam_40_12_5 Nr. of seq. 5 Alignment length(with gaps) = 12 Alignment score = 0.822222
  CAGCGtCCCaGg
>Fam_41_12_5 Nr. of seq. 5 Alignment length(with gaps) = 12 Alignment score = 0.711111
  nGGCGAgGGcgA
>Fam_42_93_4 Nr. of seq. 4 Alignment length(with gaps) = 103 Alignment score = 0.703344
  GCCGCATCCGgCAaTCAaTGCCTGATGCGACGCTGaCGCGTCTTATCAgGCCTACAactattGCCnGAaCcGTAGGcCGGATAAGGCacTcgc
>Fam_43_39_4 Nr. of seq. 4 Alignment length(with gaps) = 39 Alignment score = 0.965812
  TTTTCTTTCTTcACTTGCGGtGATACTATATTTCTTACA
>Fam_44_36_4 Nr. of seq. 4 Alignment length(with gaps) = 36 Alignment score = 0.845679
  GGtGGTTGaTTgTTATCCATgATcGGCATAATgTTt
>Fam_45_36_4 Nr. of seq. 4 Alignment length(with gaps) = 36 Alignment score = 0.870370
  TTGtTCTTCTACGACcGGtGcTTCcTCTgCAACTgG
>Fam_46_36_4 Nr. of seq. 4 Alignment length(with gaps) = 36 Alignment score = 0.882716
  CTTctGtTTCTcGCAATTACTTCcACTTCTTCTgACT
>Fam_47_33_4 Nr. of seq. 4 Alignment length(with gaps) = 34 Alignment score = 0.602941
  CCCCAGCgGggGaATaCaCcctaCaaTTCTCTCC
>Fam_48_18_4 Nr. of seq. 4 Alignment length(with gaps) = 18 Alignment score = 1.000000
  GAGCTTTAGCTGCTTCTT
>Fam_49_15_4 Nr. of seq. 4 Alignment length(with gaps) = 16 Alignment score = 0.661458
  CCgGCCAAGaAGgca
>Fam_50_14_4 Nr. of seq. 4 Alignment length(with gaps) = 14 Alignment score = 0.650794
  GaCtCAGGnCtCAg
>Fam_51_14_4 Nr. of seq. 4 Alignment length(with gaps) = 14 Alignment score = 0.746032
  GATgcGCGATgcGC
>Fam_52_14_4 Nr. of seq. 4 Alignment length(with gaps) = 14 Alignment score = 0.682540
  GCGgggAGCGgggA
>Fam_53_12_4 Nr. of seq. 4 Alignment length(with gaps) = 12 Alignment score = 0.627315
  GcCGGgGcCGgg
>Fam_54_12_4 Nr. of seq. 4 Alignment length(with gaps) = 12 Alignment score = 0.703704
  CcGCgACcGCgA
>Fam_55_12_4 Nr. of seq. 4 Alignment length(with gaps) = 12 Alignment score = 0.888889
  CCGAgCTAAGcG
>Fam_56_150_3 Nr. of seq. 3 Alignment length(with gaps) = 170 Alignment score = 0.649673

```

GACGCgGAGCGTCCAGAAcgcGcATacCcACGCGGAGCaTggGtACGATGGTGTccTTnaGnnCACCTATCGTTCTCACGCTCCAGCGTgGGAATGcTnTgcGTGACGCTC  
tGCGTCAcAgaTCTGCGCCgCGctgCaCATTCAGGaccG

>Fam\_57\_156\_3 Nr. of seq. 3 Alignment length(with gaps) = 156 Alignment score = 0.933048

TTTATTATGTAAAAATCAgCATATCCTGCACCAAAAGAATaTGTcnaTCTGCAACTATATATCCTCCATCAcTTGTCTGCTGTATGGAAnAAGCCCaATCATAAtTGCTT  
CCTCCATAGGTTTTCTCCCAAACCTTATcCCCATTACTaTCAAGC

>Fam\_58\_114\_3 Nr. of seq. 3 Alignment length(with gaps) = 126 Alignment score = 0.760141

GACGCAGAGCGTCGaGAaCTGCATTCCCACGctGGAGCGTagGGAACGAtaAtCtCAACTATCGTGCGgCGCTCCGCGTCGCATGCctTTCnGGAcGCTcTGCCTCTcT  
TGC

>Fam\_59\_108\_3 Nr. of seq. 3 Alignment length(with gaps) = 108 Alignment score = 0.720165

cCTTCGCGAAcCAAGtTCGctCCTACgGGAgttcgCgGgnccTTGTaGGAGCGAAcTTGctCGCGAAGAGGncGtTaCAGTCgATGgAtTTtCTGCGTCaGgaATATaG

>Fam\_60\_60\_3 Nr. of seq. 3 Alignment length(with gaps) = 65 Alignment score = 0.675214

ATGGTACTACCTcAACGctAAtGGTGctATGGCnACAGGtTGGCTcaAAgacaAtGGTTc

>Fam\_61\_56\_3 Nr. of seq. 3 Alignment length(with gaps) = 60 Alignment score = 0.688889

ccGTGnCGATCGCaAGCgCGGCGCaGCCGgGCGcaGCGGGTCGgCACCATCggaCc

>Fam\_62\_46\_3 Nr. of seq. 3 Alignment length(with gaps) = 49 Alignment score = 0.643991

TTTtAAaTtgAtCtGTAAAnCtTtaAcTTGTgAGAGTTCCACAt

>Fam\_63\_48\_3 Nr. of seq. 3 Alignment length(with gaps) = 48 Alignment score = 0.791667

TACGGCAGCACcCAGACcGCnGGnnNNGACAGCnCGCTGACCGCcGGc

>Fam\_64\_45\_3 Nr. of seq. 3 Alignment length(with gaps) = 45 Alignment score = 0.881481

TCTTCTTGTTGtTTACGAGCTTgTTCATCAGCctGgCGTTTTTgT

>Fam\_65\_42\_3 Nr. of seq. 3 Alignment length(with gaps) = 42 Alignment score = 0.830688

TCTTCCACTTGTGGTTCCACTACTACTTgTTCATGCAAtTGGtttT

>Fam\_66\_39\_3 Nr. of seq. 3 Alignment length(with gaps) = 39 Alignment score = 0.954416

TCAGGGGCAACAGAAACTCTAAGCAAGACGACTCCgA

>Fam\_67\_39\_3 Nr. of seq. 3 Alignment length(with gaps) = 39 Alignment score = 0.931624

GGTCAAGGAAATACaACcCCTCCAGCAAATAAcGGAGGA

>Fam\_68\_36\_3 Nr. of seq. 3 Alignment length(with gaps) = 36 Alignment score = 0.824074

TCTTCCTTAGgTTTNGCTAcTTCTTggaCTTTcaCT

>Fam\_69\_27\_3 Nr. of seq. 3 Alignment length(with gaps) = 27 Alignment score = 0.806584

TGTCGTTGCCGncgCCGCCaTACAGct

>Fam\_70\_27\_3 Nr. of seq. 3 Alignment length(with gaps) = 27 Alignment score = 0.802469

GGAATAACGGGAGtgACaGGTcCaACa

>Fam\_71\_24\_3 Nr. of seq. 3 Alignment length(with gaps) = 24 Alignment score = 0.740741

CAGgtAAGgATCcAggaACAGAtA

>Fam\_72\_21\_3 Nr. of seq. 3 Alignment length(with gaps) = 22 Alignment score = 0.727273

```

tCtCCTATtTCCTaTCTtCTC
>Fam_73_21_3 Nr. of seq. 3 Alignment length(with gaps) = 21 Alignment score = 0.788360
CGCGTgcCTGGAcGGaCGaCT
>Fam_74_21_3 Nr. of seq. 3 Alignment length(with gaps) = 21 Alignment score = 0.873016
AAGaAACAGaAAAgCCAGGTG
>Fam_75_16_3 Nr. of seq. 3 Alignment length(with gaps) = 18 Alignment score = 0.722222
GCTTCGgCGCTTCGnC
>Fam_76_18_3 Nr. of seq. 3 Alignment length(with gaps) = 18 Alignment score = 0.641975
CanAAgaAAgcaGAAGAA
>Fam_77_12_3 Nr. of seq. 3 Alignment length(with gaps) = 16 Alignment score = 0.680556
GACTCGGACTCG
>Fam_78_13_3 Nr. of seq. 3 Alignment length(with gaps) = 16 Alignment score = 0.652778
tTGGTGTGGTGg
>Fam_79_14_3 Nr. of seq. 3 Alignment length(with gaps) = 16 Alignment score = 0.791667
CCTGAAACCTGAAA
>Fam_80_15_3 Nr. of seq. 3 Alignment length(with gaps) = 16 Alignment score = 0.736111
GCCAaGAAGGcCGtA
>Fam_81_15_3 Nr. of seq. 3 Alignment length(with gaps) = 16 Alignment score = 0.791667
ggCGGTGCTTCCGGT
>Fam_82_16_3 Nr. of seq. 3 Alignment length(with gaps) = 16 Alignment score = 0.777778
TGATTgCtTGATTgCt
>Fam_83_16_3 Nr. of seq. 3 Alignment length(with gaps) = 16 Alignment score = 0.777778
GCaaGGCTGCaaGGCT
>Fam_84_16_3 Nr. of seq. 3 Alignment length(with gaps) = 16 Alignment score = 0.777778
GgtCTTCGGgtCTTCG
>Fam_85_16_3 Nr. of seq. 3 Alignment length(with gaps) = 16 Alignment score = 0.833333
CGcCACGcCGcCACGC
>Fam_86_16_3 Nr. of seq. 3 Alignment length(with gaps) = 16 Alignment score = 0.833333
TTTAAagCTTTATTTa
>Fam_87_12_3 Nr. of seq. 3 Alignment length(with gaps) = 15 Alignment score = 0.718518
GGTGGaGACGGC
>Fam_88_12_3 Nr. of seq. 3 Alignment length(with gaps) = 14 Alignment score = 0.674603
AAAcAGAAAcAG
>Fam_89_12_3 Nr. of seq. 3 Alignment length(with gaps) = 14 Alignment score = 0.761905
TGGCTGTGGCTG
>Fam_90_12_3 Nr. of seq. 3 Alignment length(with gaps) = 13 Alignment score = 0.777778
AAgGTaTAGAAC
>Fam_91_13_3 Nr. of seq. 3 Alignment length(with gaps) = 13 Alignment score = 0.692308

```

CGAaGCGaCtGaT  
>Fam\_92\_13\_3 Nr. of seq. 3 Alignment length(with gaps) = 13 Alignment score = 0.794872  
GActCGAACCgCC  
>Fam\_93\_12\_3 Nr. of seq. 3 Alignment length(with gaps) = 12 Alignment score = 0.703704  
GtCGnTGTCGaT  
>Fam\_94\_12\_3 Nr. of seq. 3 Alignment length(with gaps) = 12 Alignment score = 0.777778  
ATCTTnATCTTn  
>Fam\_95\_220\_2 Nr. of seq. 2 Alignment length(with gaps) = 220 Alignment score = 0.769697  
  
GACGTCAACGGCGACGGaCTcGAcGAccTcATcaTCGGGGCTCCcGGTGCCGACCCGGACaGaCGGTaCgaAtGCcGGcCGCAGCTACGTGGTcTTCGGCAAGCGcaaCGG  
CCAACCGGTTCGAAaTTGGCcaCaaTCGAAAGCGGCACcaGcCGcaACGGCTTTGcCATCAACGGCAGCAATGACTACGATacCgCCGGCgTTgCTGTcAGCGGAGCGGGG  
>Fam\_96\_155\_2 Nr. of seq. 2 Alignment length(with gaps) = 155 Alignment score = 0.638710  
  
CTCCAGCGTaGGaAcGCcGTTCCGGACGCTCTGCGTCCGaTCTTGAAcaTGTGcaacGCGACgCaGAaTTGTGACGCAGAGCGTCACGaAACgGCATGaCaACGCGGAGC  
agTcGCACGATAGtcatcTcGaGGcacaaGTcATCGTTCCcaCG  
>Fam\_97\_153\_2 Nr. of seq. 2 Alignment length(with gaps) = 153 Alignment score = 0.612200  
  
TTGCGCCAGAGaATGTCcGGcTTGCCGTcGaaagCGanAAaTCGcCcGCCCGaCGATCTGCCAGcccaGATCGCCCaGaaCgGtAGaGaaACcGaCGaacAGaAGaCc  
GtGCCGTTcATcAaCCAGACGcaaTTGGCACCGcTgGcCtTG  
>Fam\_98\_141\_2 Nr. of seq. 2 Alignment length(with gaps) = 141 Alignment score = 0.971631  
  
AATGCCATGCTCTGCAAGATGCTGCATCAGACGCTGAGCCACATCAGGCAaAGGTCTTGATTGTTcATTTTTGTACTGGCGGcGgTGGCGCAGGCCAGTTAGGTGCCGGAGG  
AATATGTTcAGCCATATTCGGGCTGGTTG  
>Fam\_99\_138\_2 Nr. of seq. 2 Alignment length(with gaps) = 138 Alignment score = 0.978261  
  
CCAACCCTGGAGGGCAACACCTGCCAGGGGAACAAGgaGAGCGGCATCGCCTACGTTGGCAGTGCAGGGGGCATCGCTCGCCAGAACACCTGCAGCGGCAATGAGTACCAT  
GGCATCTATGTGGGCGAGCAGGCGCAA  
>Fam\_100\_130\_2 Nr. of seq. 2 Alignment length(with gaps) = 130 Alignment score = 0.621795  
  
gCCGGaTGGCGGCTaaCGCCTTAcCCGGCCTACaGaGcCctgtaTaTCAaAcGGttaCTcAtACacCGcAGGCCCGCGCAAGCGCAGCGCCCGGGCAAGctaTAcCAGa  
CaCcGTaCCcGTaATTgTc  
>Fam\_101\_130\_2 Nr. of seq. 2 Alignment length(with gaps) = 130 Alignment score = 0.989744  
  
CCTTCGCGGACAAGTCCGCTCCTACGCCCGTTGGGCAGAATCAAAAACGGCCTCCTGCCCGAGGGGTAGGAGCGAACTTGTTCGCGAAGACGGTTCGCTCAGGCGATGCATG  
TcCGGAAAGCTTGGCGGCC  
>Fam\_102\_118\_2 Nr. of seq. 2 Alignment length(with gaps) = 118 Alignment score = 0.830508

CTTGTTTCGCGAAGaCATTGTTTcaAACGaCaAATCTTccGCGACTGTACGGGCCCTTTCGCGAACAAGTTCGCTCCTACGTTcGaGCaTGGGAgaCGGatGGCTTTTGTAG  
GAGCGAA

>Fam\_103\_114\_2 Nr. of seq. 2 Alignment length(with gaps) = 114 Alignment score = 0.859649

GcCTGATGCGAcGctTaACGcGTCTTATCAGGCCTACGcCAGACAGCGCAATAGCCTGATTTaGCGTGAatTTTTGTAGGTCGGATAAGGCGTTTAcGCCGCATCCGaCATC  
AAc

>Fam\_104\_112\_2 Nr. of seq. 2 Alignment length(with gaps) = 112 Alignment score = 0.625000

GAGCGCGCCGGAGGCGcGCGCTCCCAGGgGATactGacaCGCCcCCGcGGGcGCGGGaAccaCCGaTGCCGGATGGcTcCCGCTGtcGCGaGttGaGCTGGgycAcGTGG  
g

>Fam\_105\_111\_2 Nr. of seq. 2 Alignment length(with gaps) = 111 Alignment score = 1.000000

CGTGCGATCGCAAACCCCGCGCCTGGCGACAATGCGGCCCGCAAACGGGCCGAGGAGGCCAGGCAATCACCCAGAGCCGGGTGCAGCGGGTCGCCACCATCAGCCC

>Fam\_106\_88\_2 Nr. of seq. 2 Alignment length(with gaps) = 88 Alignment score = 0.765152

GCCCGGATAAGGCGcaAGCCGCcATCCGGGaAcCtCTCCCGGTGGCGCTGaCGCTTACCGGGGCTACaAACCGaAtGCcaAaCcGTA

>Fam\_107\_66\_2 Nr. of seq. 2 Alignment length(with gaps) = 66 Alignment score = 0.797980

ATAGTTAATCTAAAACACTTTATgTATTNATNTCATCCatTTAnGNnacTANaATTTACATTCCAT

>Fam\_108\_63\_2 Nr. of seq. 2 Alignment length(with gaps) = 63 Alignment score = 1.000000

TGGTATCTCTTTGATCGCTCTTCTGGAATCATGAGAAAAGGACAGGTCAATGATGCTGGGAAT

>Fam\_109\_60\_2 Nr. of seq. 2 Alignment length(with gaps) = 60 Alignment score = 0.933333

CCGATGTTGTAGCTGCCGNGTTGGCAAAGCCAGGTTGTTCGNTGCCGANGTTNGCGAAG

>Fam\_110\_60\_2 Nr. of seq. 2 Alignment length(with gaps) = 60 Alignment score = 0.966667

CGGCAGGCTGGTCAGCTGGTTACCAGAGACCNACAGCTCCTNTAGTCCTGACGGCAGCGC

>Fam\_111\_57\_2 Nr. of seq. 2 Alignment length(with gaps) = 57 Alignment score = 1.000000

CTAGCGTGGCGACGATGCGGGCTGGGATGGGCCGCTGAGGAGCCGCGCGGTTCGAGCT

>Fam\_112\_54\_2 Nr. of seq. 2 Alignment length(with gaps) = 54 Alignment score = 0.759259

TGAccTCgCGCCGGcGACGATGCAGAGCGaAGCGATGAGcAGGAGCGGCGCaga

>Fam\_113\_54\_2 Nr. of seq. 2 Alignment length(with gaps) = 54 Alignment score = 0.833333

CCTTTTTACCTTTaGCaCCTTGcGCTCCAGTcAGACCaCGTTCaCCTcGGTCT

>Fam\_114\_50\_2 Nr. of seq. 2 Alignment length(with gaps) = 50 Alignment score = 0.613333

AGGCTCGGGAaaAAcaaTccACaaaACTcAGCCTCGTaTcTcATTTTC

>Fam\_115\_45\_2 Nr. of seq. 2 Alignment length(with gaps) = 45 Alignment score = 0.940741

ACTGGACCTCAAGGTGTTCAAGGACCAGCAGGTGCTACcGGTGCC

>Fam\_116\_45\_2 Nr. of seq. 2 Alignment length(with gaps) = 45 Alignment score = 1.000000

GAACGATTAGAGGCAGAGAGAAAAGAGCAAGAAAAGATTGGAAGCA

>Fam\_117\_45\_2 Nr. of seq. 2 Alignment length(with gaps) = 45 Alignment score = 0.911111

AAGAAGAAAGCGGAgGCCGAGGCGGCGAAAGCaGCGGCGGAcGCG

>Fam\_118\_44\_2 Nr. of seq. 2 Alignment length(with gaps) = 44 Alignment score = 0.772727  
GCGGGGACAGGCACCgcaAGGAaTcGGCGGGTGCCAGTcccCCCT

>Fam\_119\_42\_2 Nr. of seq. 2 Alignment length(with gaps) = 42 Alignment score = 0.809524  
GGaATaACTGGTCTACTGGaGTTACAGGacCTACCGGAATc

>Fam\_120\_41\_2 Nr. of seq. 2 Alignment length(with gaps) = 41 Alignment score = 0.837398  
CCaGCcGACTcCCGGGGTGCCTGTCCcACGaGGACAGGCA

>Fam\_121\_39\_2 Nr. of seq. 2 Alignment length(with gaps) = 39 Alignment score = 0.662393  
GGATCTTCCGGTTCACTTCTGGcTCcTTCggctctttc

>Fam\_122\_39\_2 Nr. of seq. 2 Alignment length(with gaps) = 39 Alignment score = 0.606838  
GTGGccGTcCGgCGcGCGCCgTCCaCGcTCGTCCGGcGC

>Fam\_123\_39\_2 Nr. of seq. 2 Alignment length(with gaps) = 39 Alignment score = 0.606838  
TgcAAAATGTaGGAActCaCaCaAAGaTcTAAGTTcaaC

>Fam\_124\_39\_2 Nr. of seq. 2 Alignment length(with gaps) = 39 Alignment score = 1.000000  
AATCCGGAACAAAATCCAGCAACTAAACCTGCTACTGAC

>Fam\_125\_31\_2 Nr. of seq. 2 Alignment length(with gaps) = 31 Alignment score = 0.967742  
CCCAGTTGAAGNCAGCCCGTATTCAAGGCG

>Fam\_126\_30\_2 Nr. of seq. 2 Alignment length(with gaps) = 30 Alignment score = 1.000000  
TTGTTGTTGCCGAGATTTCGCAATGCCCAGG

>Fam\_127\_30\_2 Nr. of seq. 2 Alignment length(with gaps) = 30 Alignment score = 0.966667  
CCGAGTTGAACNAGCCGGTGTGATGTTGC

>Fam\_128\_30\_2 Nr. of seq. 2 Alignment length(with gaps) = 30 Alignment score = 0.933333  
AAACCGGTGTTTCGAGTCACCCGCATTNNCG

>Fam\_129\_26\_2 Nr. of seq. 2 Alignment length(with gaps) = 26 Alignment score = 0.602564  
GGaCaAgGCGGCTaCGGCGGcGGTca

>Fam\_130\_24\_2 Nr. of seq. 2 Alignment length(with gaps) = 24 Alignment score = 1.000000  
AGCTTCTTCTTCAGCTTTTTTTTGT

>Fam\_131\_24\_2 Nr. of seq. 2 Alignment length(with gaps) = 24 Alignment score = 1.000000  
CATCTTCTTTCACATTCTCTCTA

>Fam\_132\_23\_2 Nr. of seq. 2 Alignment length(with gaps) = 23 Alignment score = 0.739130  
TTTTTCGGGATaaCCtATCCCCc

>Fam\_133\_22\_2 Nr. of seq. 2 Alignment length(with gaps) = 22 Alignment score = 0.863636  
AGAAGNTGAAAGANCCAAAGAN

>Fam\_134\_21\_2 Nr. of seq. 2 Alignment length(with gaps) = 21 Alignment score = 0.809524  
GCCGAGCAaGAaCGcCAACGC

>Fam\_135\_21\_2 Nr. of seq. 2 Alignment length(with gaps) = 21 Alignment score = 0.809524  
TGTcTTcTGTcTTTCTTGTTc

>Fam\_136\_21\_2 Nr. of seq. 2 Alignment length(with gaps) = 21 Alignment score = 0.952381  
GGTACCGGTGCGCCcGGGATC

>Fam\_137\_19\_2 Nr. of seq. 2 Alignment length(with gaps) = 19 Alignment score = 0.614035  
GGCgcGCAGGGCAGAgccg

>Fam\_138\_19\_2 Nr. of seq. 2 Alignment length(with gaps) = 19 Alignment score = 0.622807  
CGaACGaCGcGaACGGCCg

>Fam\_139\_18\_2 Nr. of seq. 2 Alignment length(with gaps) = 18 Alignment score = 0.731481  
gtACGACCCGGGcCGGCa

>Fam\_140\_18\_2 Nr. of seq. 2 Alignment length(with gaps) = 18 Alignment score = 0.666667  
TcGcCGGGTaaCGCTGGG

>Fam\_141\_18\_2 Nr. of seq. 2 Alignment length(with gaps) = 18 Alignment score = 0.629630  
GCTAaAcAAcATAGAtTA

>Fam\_142\_18\_2 Nr. of seq. 2 Alignment length(with gaps) = 18 Alignment score = 0.851852  
CCTTGGTTGTcGTTTCa

>Fam\_143\_18\_2 Nr. of seq. 2 Alignment length(with gaps) = 18 Alignment score = 0.722222  
AGTTAAATAATtcaCAGa

>Fam\_144\_18\_2 Nr. of seq. 2 Alignment length(with gaps) = 18 Alignment score = 0.703704  
AACgGCAGaGaAAAAGGTc

>Fam\_145\_16\_2 Nr. of seq. 2 Alignment length(with gaps) = 16 Alignment score = 0.718750  
TgACTTATTgACTTAt

>Fam\_146\_16\_2 Nr. of seq. 2 Alignment length(with gaps) = 16 Alignment score = 0.635417  
cCACCATgcCACCATg

>Fam\_147\_16\_2 Nr. of seq. 2 Alignment length(with gaps) = 16 Alignment score = 0.635417  
GCCGaGAAGAcAGGct

>Fam\_148\_16\_2 Nr. of seq. 2 Alignment length(with gaps) = 16 Alignment score = 1.000000  
GAGGCGGTGAGGCAGT

>Fam\_149\_16\_2 Nr. of seq. 2 Alignment length(with gaps) = 16 Alignment score = 0.666667  
cGCTTcTCcGCTTcTC

>Fam\_150\_16\_2 Nr. of seq. 2 Alignment length(with gaps) = 16 Alignment score = 1.000000  
CCGCAGCACCGCAACG

>Fam\_151\_16\_2 Nr. of seq. 2 Alignment length(with gaps) = 16 Alignment score = 0.666667  
GAACTGacGAACTGac

>Fam\_152\_16\_2 Nr. of seq. 2 Alignment length(with gaps) = 16 Alignment score = 0.666667  
CaGCTaAACaGCTaAA

>Fam\_153\_15\_2 Nr. of seq. 2 Alignment length(with gaps) = 15 Alignment score = 0.644444  
GAgCcGGCGGCTcaG

>Fam\_154\_15\_2 Nr. of seq. 2 Alignment length(with gaps) = 15 Alignment score = 0.822222  
CCAGAACCGTTaCCa

>Fam\_155\_15\_2 Nr. of seq. 2 Alignment length(with gaps) = 15 Alignment score = 0.644444  
TAAACaaGAaAATAa

>Fam\_156\_15\_2 Nr. of seq. 2 Alignment length(with gaps) = 15 Alignment score = 1.000000  
TTTAAATGAAGAAAA

>Fam\_157\_15\_2 Nr. of seq. 2 Alignment length(with gaps) = 15 Alignment score = 1.000000  
TGGACGGGCGCTTGC

>Fam\_158\_15\_2 Nr. of seq. 2 Alignment length(with gaps) = 15 Alignment score = 0.822222  
TGCCCGTACTGGgcC

>Fam\_159\_14\_2 Nr. of seq. 2 Alignment length(with gaps) = 14 Alignment score = 0.773810  
ATAGAGtATAGAGt

>Fam\_160\_14\_2 Nr. of seq. 2 Alignment length(with gaps) = 14 Alignment score = 0.619048  
CGTTaaCCGTTaaC

>Fam\_161\_14\_2 Nr. of seq. 2 Alignment length(with gaps) = 14 Alignment score = 0.809524  
CaTTCGACaTTCGA

>Fam\_162\_14\_2 Nr. of seq. 2 Alignment length(with gaps) = 14 Alignment score = 0.619048  
aAAGaAgaAAGaAG

>Fam\_163\_14\_2 Nr. of seq. 2 Alignment length(with gaps) = 14 Alignment score = 0.619048  
cGATTAacGATTAa

>Fam\_164\_14\_2 Nr. of seq. 2 Alignment length(with gaps) = 14 Alignment score = 0.714286  
CATTgCTCATTgcT

>Fam\_165\_14\_2 Nr. of seq. 2 Alignment length(with gaps) = 14 Alignment score = 0.809524  
AGTcCCTAGTcCCT

>Fam\_166\_13\_2 Nr. of seq. 2 Alignment length(with gaps) = 13 Alignment score = 0.653846  
gGAGGAgGTaGTT

>Fam\_167\_13\_2 Nr. of seq. 2 Alignment length(with gaps) = 13 Alignment score = 0.705128  
CgCTGCTaCGGGg

>Fam\_168\_13\_2 Nr. of seq. 2 Alignment length(with gaps) = 13 Alignment score = 0.602564  
TGAGcaAGGaCGc

>Fam\_169\_13\_2 Nr. of seq. 2 Alignment length(with gaps) = 13 Alignment score = 0.705128  
CGaTGtGACGcCt

>Fam\_170\_12\_2 Nr. of seq. 2 Alignment length(with gaps) = 12 Alignment score = 0.722222  
CacCGGTcGGGT

>Fam\_171\_12\_2 Nr. of seq. 2 Alignment length(with gaps) = 12 Alignment score = 0.666667  
GCAGTCGgcGaT

>Fam\_172\_12\_2 Nr. of seq. 2 Alignment length(with gaps) = 12 Alignment score = 0.777778  
GTCTCcGTCTCc

>Fam\_173\_12\_2 Nr. of seq. 2 Alignment length(with gaps) = 12 Alignment score = 1.000000  
GAAAAGCCTAAC

>Fam\_174\_12\_2 Nr. of seq. 2 Alignment length(with gaps) = 12 Alignment score = 1.000000  
GACCACGCCGGT



>Fam\_175\_12\_2 Nr. of seq. 2 Alignment length(with gaps) = 12 Alignment score = 0.777778  
GAACaCAAGcCG  
>Fam\_176\_12\_2 Nr. of seq. 2 Alignment length(with gaps) = 12 Alignment score = 0.777778  
CCATaACCATaA  
>Fam\_177\_12\_2 Nr. of seq. 2 Alignment length(with gaps) = 12 Alignment score = 0.777778  
TTTACcTTTACc  
>Fam\_178\_11\_2 Nr. of seq. 2 Alignment length(with gaps) = 11 Alignment score = 0.696970  
AGCGCaGGGgA  
>Fam\_179\_10\_2 Nr. of seq. 2 Alignment length(with gaps) = 10 Alignment score = 1.000000  
GCGAGCAAAG  
>Fam\_180\_10\_2 Nr. of seq. 2 Alignment length(with gaps) = 10 Alignment score = 1.000000  
CGACGCAGGC  
>Fam\_181\_10\_2 Nr. of seq. 2 Alignment length(with gaps) = 10 Alignment score = 1.000000  
CGCGTGTCTGT  
>Fam\_182\_297\_1 Nr. of seq. 1 Alignment length(with gaps) = 297 Alignment score = 0.000000

GGTTACTGGATAAACACCTGGTATGGTACCTACTGCTACGTTGATAGCACCTGTTGTTGGATTTAAAGTTACTCCTACTGGCCATACGCCTGAGGTTGCTATTGTCGCATT  
ACCGCTTACTCCTAAAGTCGCTGGTAATCCATTTACAACATCGTTTAAATGCTACATTTGGTATGGCTTCCCCTCCTGTTGATGGTGTGTACCGCTATCTGCTACTGGATT  
TAATACCGCTGTTACAGTACTGTATTTACTACTGTAGCACATGTTTGTGGCGTTAGTTTATCACACAATTGGTA

>Fam\_183\_291\_1 Nr. of seq. 1 Alignment length(with gaps) = 291 Alignment score = 0.000000

TTTTCTTCTTTTCTTCTACTATTGCTGGTTCATCTGCTCGATAGTAGATGTCTACCACTGCGTCCAAACTTTCTGAAGTTACTTCTACTTCATCTACTGTGCCTGGAATT  
GCTGTGTAGCCTTCTTGCTCTGGGGCTGTAAAGCTTTCCCAACGACCTACGGTCCATGGTCCATATTTCTTCTCGTCGCTGCCTGCTACACTCGTGTACTTCCTTTCCAAG  
GTTACTGGCTGTCTTGTGTTTGAAGTTACCATTTGGCAAGTGTACATTAATTGTTTCGCGTGATTGTC

>Fam\_184\_276\_1 Nr. of seq. 1 Alignment length(with gaps) = 276 Alignment score = 0.000000

GGTGACCTCGTCGGCGAAGGCGGAGAGCTGGTTCGACCATGGTGTGATGGTTCGCTTTCAGCTCCAGGATCTCGCCGCGGGCGTCCACGGTGTATCTTCTGGGACAGGTCGCC  
CCGGGCCACGGCGGTGGCCACCTGGGCGATGTTGCGGACCTGGTGGTTCAGGTTGNNCGCCATCAAGTTGACGTTGTCGGTGTAGGTCCTTCCAGGTCCCCGNGACGCCCGG  
CACGTNGGCCTGGCCGCCGAGCCGCCGCTCGGTGCCGACCTCGCGGGCGACGCG

>Fam\_185\_261\_1 Nr. of seq. 1 Alignment length(with gaps) = 261 Alignment score = 0.000000

TTTATCTGAACCTTTTCTGTTATTTCAACACTTGTGTTGCTTCATCATCAGTACGAGCAACTGTAAAGTCTACATAATCAGTTCATTTACTAATCCAGCTGCAGTTAA  
CACAGTTTCAATTTGTGTTTTAAACAGTTGAAACATCATTTCCCTTTAGCAGCTGAAATTTTTAAATCATCAGCTTTAATAATATCTGCTAAATCTTTTGAAAAGTCTGTTGA  
TCAAGTTACAACAAAAGTTACTTTAGAACCATCAACAAC

>Fam\_186\_258\_1 Nr. of seq. 1 Alignment length(with gaps) = 258 Alignment score = 0.000000

GCTGTAAAGTTTTGACCATTGANATCTAATATAATATTTTCAATCGGATTTGGNGCAATATCATCAATCAANGCATCTGCTTGACCTCTGTACTGCGGTTACCCGCTCGG

TCAACGACAACAAAAGTAAGCTCTTCGCCATGTAAATGCACTTGATANAAATAACCTGAAACATTACCNGCGCTATCNGCTGAACCAGAACCTACGACNTCACCANTAGCA  
TTTTTGGACTTCAATTTGAGTATTTGCTTCTGCCTGA

>Fam\_187\_255\_1 Nr. of seq. 1 Alignment length(with gaps) = 255 Alignment score = 0.000000

TCACCCAAGACACTGGCAGCTCCAGCAGTGACTTTATCACCAACGACAACACCCTGATTTTCAAAGGTACCGTCGATTTAGGTGACAACAGCACCTTAGCCGTCACCATCA  
ACGGCGTGGTCTACACCACCGCCAACGGCTTAGTGATTGATGCACAAGGCAACTGGAGTGTTGACCTGACNGGCACCGTGCTGCCTGACGGCATTACCCTGTCAGCGCCA  
CCGTCACCGACGTGGCCGGCAACAGCAAAACCG

>Fam\_188\_255\_1 Nr. of seq. 1 Alignment length(with gaps) = 255 Alignment score = 0.000000

CTTCGCTTGGCGTACTGTGAATGAACCATCATTCGTTAANAAATCACCATTACTAATACCNGAATCAGTATCCAATGTGATTGTCCGNGCATTCGGAGCCTGAGTATCTA  
AAACAAAATCTAGTGTACTCGAGCCAGACACATTACCCGCAGCATCAGTTTCTCGAACCGTAATTGAGTTGTGCCTTCAACCACAGCAGGAGGGGTGTTGACCAACTGC  
CATCCGCAGCCTGATATTCAACTGTATTGCCAA

>Fam\_189\_252\_1 Nr. of seq. 1 Alignment length(with gaps) = 252 Alignment score = 0.000000

CTGATTTGGCAGACGGCACGAAAGCCACTCCAACGCAGCCAGCTAAGACAGAAGTGAAGACCGCTGATGGCACTTGGACCTTCAAGTCTTACGACAAGGCTGAAGAGACCA  
TCAATGGAGCAGACGCTCACTTTGTTGGTACATGGGACTTTACACCAGCGCCAACCTATAAGGCGACTCACGAGTTCGTTAGTTGGTACAGCAGGTAAGGAATTGCCACAAG  
AAGTGAAAGCCTTGCTTCCAACCGACAAAC

>Fam\_190\_243\_1 Nr. of seq. 1 Alignment length(with gaps) = 243 Alignment score = 0.000000

TAGTAACCGTAGATAAAAACCGCACCTACTGCTACTGCTGGTACAGCACAAACCCTTACTTGTACTATTCCTACTGTAACTTTAGGTGGAACAACCTACTTCTACAGGAACTA  
ATTTTACACACAGCTGGAGCAATGGTACTACAACGGTAGGAACCTACGCCTACAATAACGGTAAGCACAGCAGGTAACCTTACCTAACGGTAACCAACACCTCTAACGGAT  
GTACAAGCACCAATAGCGTAA

>Fam\_191\_243\_1 Nr. of seq. 1 Alignment length(with gaps) = 243 Alignment score = 0.000000

ACCTGGTAGGTCAGGCTCGGATCGGCATCGCCGTAGACCTTGGTCTTGGCGTCCGGCGATCACATTCAGCAGTGCCTTGGTGATGGTCAGGTTGTTGCCCTGGTAAGCCAGG  
TCATAGTTACCGCTGACCAGACCCAGGCCACCCTGCTGAATCCCATAACGCGACGTTCTCGCCAGACACACGAACCAGGCCGCCATTGAGCACCGCGCCAGCGGTA  
TCGCCATTCTTCAGGCCGCTG

>Fam\_192\_237\_1 Nr. of seq. 1 Alignment length(with gaps) = 237 Alignment score = 0.000000

CAGATGCCGATAAGAATGATCCAGCAGGTAAAGATCAGCAAGTCAATGTAGGTGAGACACCGAAGGCAGAAGATTCTATTGGTAACTTACCAGATCTCCGAAAGGTACAA  
CAGTAGCCTTTGAAACTCCAGTTGATACGGCAACACCGGGAGACAAACCAGCAAAAAGTTGTTGTGACTTACCCAGATGGTTCAAAGATACTGTAGATGTGACTGTTAAGG  
TTGTCGATCCACGTA

>Fam\_193\_228\_1 Nr. of seq. 1 Alignment length(with gaps) = 228 Alignment score = 0.000000

GCCTCGCCACCTGGTTGCGCACTTGCCACATCCGATGCACCATGACCTGGGTCTACCGGTGTCCCAGCTTTTCGCTAACGATGCCGGTTCACCTTGTGGGTTATGGCCTTGT  
GCCACCTGTGGGCGACCGTCGTCTTCCCCCCTTGTGTGCCTTGTGCTCCGCCAGTTTGAGTCGCGGTTCGAGATTGGCTCGCCCTGAGTGTGCAGACTCGGTGTCTGAGCA  
CCTTTA

>Fam\_194\_227\_1 Nr. of seq. 1 Alignment length(with gaps) = 227 Alignment score = 0.000000

CTCGTCACAGGGATGAGAGCAGCGCCGCGTCTGCGGCGCGGAAGAGTCTTTTCAGCCCAAGGACTTGGTCTGGCTGGATTCCTGTGACGAGCACAGGAATGAGGGAGGCGG  
GGATGCACGGGCGCTNCCGCAACCTCGTTTGGGGACTGCGCGCCATCTCCTCGATATCCGCGCACCTATGAGAACTATTCGAGGGACCGGGACCTCTCTCCCCTCATCC  
CTGTG

>Fam\_195\_219\_1 Nr. of seq. 1 Alignment length(with gaps) = 219 Alignment score = 0.000000

TGCTGATGTTTGAGTTATATAATCAATTGAAATATCAGAAGCTAATAAATTTGAGTTTTTTGCTAAAATACTTGCTTGAATTGTTGAAGCATTATTATCTTGTAGATTACC  
TAAATTAGTATTAATTAAACTGAACTTAAATTTGTTTAACTTGAATAGTAAATGTTACATTTACAGAACCTGTATATCTTCCAGAAGCTGATGAATTAACCTCT

>Fam\_196\_219\_1 Nr. of seq. 1 Alignment length(with gaps) = 219 Alignment score = 0.000000

TATCTGTTTACGCTTTACCGACACGACGTTTTTCGGGTGGCACGCTCGAGGCGGTGATCGGCAAGGGCTATACGGGCGGCAAGAATGTCGATGTCGCCGCGCTCGNTGNANAT  
GATGNGTTTCGGTGNNTTCNGTCTCGCTGAACGCGGGGGACCGTCTGGCGGTTCGGGCGNATCTGGACGACGGGTCCGGCAACNGCGTGANAGATTCGGGCGCGGTG

>Fam\_197\_207\_1 Nr. of seq. 1 Alignment length(with gaps) = 207 Alignment score = 0.000000

CTCGCGTTGCTCGGTACGGCCTACTTGGCATGCTCAGCAACGTTTGACATGTGACCCATCCGTAGGCCGGACCGCAGCGTCAGCGGAGTTCCGGCAATCAGTCGGCACGAT  
TTGATTCCGACCGAGTGTTTGATCGCGGGTTTTGTTCTTTGGTGGGTGGTTTACGTTGGGGACCAACGTGCGACAGGTTAGGTGTGGATGCCGTAA

>Fam\_198\_204\_1 Nr. of seq. 1 Alignment length(with gaps) = 204 Alignment score = 0.000000

GTGAAAAAAGGTGCTTCAGGTAACACTGGTGGCTCAAGCAACGGTGGTTCTAACAATAATCAATCAGGAACGAATACGTACTACACNATTAATCAGGCGATACCTTGAAC  
AAAATTGCCGCCAATATGGCGTGAGTGTTGCTAATTTACGCTCATGGAATGGCATCTCTGGCGATTTAATTTTCGCTGGTCAAAAAATTATC

>Fam\_199\_198\_1 Nr. of seq. 1 Alignment length(with gaps) = 198 Alignment score = 0.000000

TGTCTATGTGGCGGGGAGACCTNNTCCACCGACTTCCCCACCACGGCGGGAGCGTATGATAGGACGTACAATGGTGGTGGCAGCGATGCGTTTCGTGAGCCGCTTGAGCGG  
CGACCTGGGCAGCTGCTCGCCAGTACCTTCCTCGGCGGGAGTGATTGGGACTCNGCCACCGCCCTCGCGCTGGACGGGCAGGGGAN

>Fam\_200\_193\_1 Nr. of seq. 1 Alignment length(with gaps) = 193 Alignment score = 0.000000

GACACAGAGGACACAGCGAGGATAAATACCGAGGTCTCCCACAGCGGCAAGAATACCCTTCCC GCCAGGATTGCCCGTGTTTGGAGTGCGCCAGCCATGCTGCCGCGCCCA  
CCACACTCACCGTGGCGGGCGTGTTCCAGCGCTAACTCCGCTGGCAATGGGAAGTCTTGACACGTCTGTATTGCACCACCGA

>Fam\_201\_189\_1 Nr. of seq. 1 Alignment length(with gaps) = 189 Alignment score = 0.000000

ACTTTATCATAATTAATTTNAAATTATGAATTTTATTTGCCTCTTCAATGAATTTCTTGCCTAGTTATTTTCTTTTTTCCATTACACTCAACACAGCCATTACCTCTTAA  
TGGTCTTGAGGTACTTGTTCAAAATCNCCATGTTTTTACAAGTAATAATTACTTTTGGAGTTGCTATTTACATAAACG

>Fam\_202\_189\_1 Nr. of seq. 1 Alignment length(with gaps) = 189 Alignment score = 0.000000

TCAGCGTACCGCCGATAATGGTGGTGGCGCCGGAGTAACTGTTGTCGCCGCTTAACTGTCAGCTCGCCNGTACCGGTTTTGACCAGCGAACCGCTGCCGGAAAGCGTATTTT  
CCAGCTCGCCCTCGCCGACCTGAAGCACGCCGCTGTTGGCAACAGCTCCGGTACCCAGCGAATCCGCATGGTCAGCCG

>Fam\_203\_186\_1 Nr. of seq. 1 Alignment length(with gaps) = 186 Alignment score = 0.000000

GATTCGCCTGTTTGGCAGAGGTGTCGTATGCGTGACTGTGACCGCCATCCGTGACGGCGGCACACANCACGTAGGAGCGCGCTTGC GCGCGATGAAGCTGTCNCGGTGACG  
CCCCATCGCGCGCAAGCGCGCTCCTACGACCGCCGATGCGTGCGGGAGTGTGCTGACATCAGACCAGNCACAGCA

>Fam\_204\_185\_1 Nr. of seq. 1 Alignment length(with gaps) = 185 Alignment score = 0.000000

ATGGCGGTGAGGGGGGATTGACTCGCTGCGCTCGCCCTTCGGGCAGCCCGTTGCTGCGCGCCCGGTCTGTCCAACCTGGCTGCGCCAGTTGTGCAACCCCGGTGCGGTGGT  
TCTCATCCCCCTTGGTTTGGGGATACATATAAGCAAAAAGCCTGTACTTCTGTACAGGCTCTCAACTTGAAG

>Fam\_205\_182\_1 Nr. of seq. 1 Alignment length(with gaps) = 182 Alignment score = 0.000000

GCTGACGCGTCCGGTGGGACAGAAATGTAGGCCAGGTTGTACCTGGCGGGGTGAATGGACGGACATCGCTGAGTCTTGCCTGACCGGCTGGACGGCTCGCTTTGTTCCAA  
AGCATCGGCTGGGTGCCAGTAATGACCTGGCCTACGTTGGTGGCTTCGCCAGAAATTCAGACGTGTCTCTC

>Fam\_206\_178\_1 Nr. of seq. 1 Alignment length(with gaps) = 178 Alignment score = 0.000000

ATGGTGGTGGGGGAAGGATTACTCAGCGCTGCGCGCTTCGCCCTTCGGGTCGTTGCCTGCGGCAACGCTCTCTCGCTGGCGCTCGAGTCGAACCTTGGTCGAAGCTTCTCA  
TCCTTCCCCGCATGGGCAGAATATTTGATTGCGGATTCGNTTGAGAGTTCAGGGACTTTTGAAAGTG

>Fam\_207\_178\_1 Nr. of seq. 1 Alignment length(with gaps) = 178 Alignment score = 0.000000

ATTTTATTTCTGCCGAAGAAGGGACTCGCCCCTTCACAGTCTCGCGTCGTGCTCGACTGGGTTCGGGGCGTCTCGAACTTGCCTCAGCACATCGTGTGCTTCGGTCGCGT  
TTCTCGCTTTTGTAGGAAAGCTCAAACGCTTTTCAAGTTCGCTTCGAGTCCCCGTTATGTTGTTA

>Fam\_208\_178\_1 Nr. of seq. 1 Alignment length(with gaps) = 178 Alignment score = 0.000000

TCGCGCCCCGAGGGCGCTCCTACGGGAGATCCGTTGCGAGGTGAGAGCTTGCCGATCACGTGGCTCGTGCATCGATTTGCAGCGGAGTGGATCACGACTAAACCAGCGACGG  
CTGTGAGATGGCGTTGGCCGTGTAGGAGCGCCCTTGGGCGCGATGGGGCGTTACCGGGAAGGCCTCA

>Fam\_209\_177\_1 Nr. of seq. 1 Alignment length(with gaps) = 177 Alignment score = 0.000000

TGTAGCTGGTGACTTTAATGGTGATGGTAAANCTGATATTGCTGCTATGTACGATTATGGCGGNGGTGAAACTAGAAATCCATGTATTNACTTCAACTGGAGATTCNTTTAC  
CTACACTGGNGCAAATGGTTGGTGGAACTACTGGTTATGATGCTAACAGAGTTACTGGAAGGGT

>Fam\_210\_177\_1 Nr. of seq. 1 Alignment length(with gaps) = 177 Alignment score = 0.000000

AAAAGTCTTGTCCATTGTTTGTTCACCACTATCATACTTTGTCACAAATAGATCTTGGGTTCCTTAAGGCTTGACCGTCTAAATTTCCGGAAGTCANTCCGGTTATA  
TATACATTTCCAAAATATCAGATGTAATTCATTNGCCTAAGTAGTTTGAACCTCCCGCCACTCCT

>Fam\_211\_174\_1 Nr. of seq. 1 Alignment length(with gaps) = 174 Alignment score = 0.000000

TTAAGTTAGGTAAATGTAAGATTTTCATAGAAAGCATTTTGTGTTCTTTGTTGAATTTGTTATCAGCTTTCCGGTGCTTGAATTCATTTAACTTTTTAGCTTCTGCTAAAA  
GGTTAGCGCTTTGGCTTGGGTCATCTTTTAGGCTTTGGATGAAACCATTGCGTTGTTCTTCGT

>Fam\_212\_174\_1 Nr. of seq. 1 Alignment length(with gaps) = 174 Alignment score = 0.000000

AATCCTTCCCCACCACCATCTATTAATTATTCACCATCTCCTCAGTAAATAACTAAATCAAAAAATAGCACCCATCAGGGGAAGGTAAGAACCTTCGACCAAGGTTTCGCG  
CCGAGCATAGCGAGACAACGACGCGCAGCGGGCGCCCGAAGGGCGAGGAACAACGTGACGAGT

>Fam\_213\_173\_1 Nr. of seq. 1 Alignment length(with gaps) = 173 Alignment score = 0.000000

TGGTTGCGGGGGCCGGATTTGAACCGACGACCTTCGGGTTATGAGCCCGACGAGCTACCGAGCTGCTCCACCCCGGTCCGAATTGTACTGCCACCACAAGAGACAGAGCA  
GTTGCCCCTTGCTGTCTTCGTTTCCACCGCAGGCGCTAGCGCTTGCCATGGACACAAATAGT

>Fam\_214\_173\_1 Nr. of seq. 1 Alignment length(with gaps) = 173 Alignment score = 0.000000

CCGTCGGCCGAGATCGACGGNAGNCGCTGGCGNCCGTGCCCTCCGCGCCGTTTCGCGTCGACGCTGACCCGGTTCGGTCGCGGTGNCNGCTGGTCGTACACGAACACGTCNC  
GGNCGCGGTTTCGTGTCGACCGGCACGAGGNTCCNGGCGAAGGAGTCAACGCGATGTAACGG

>Fam\_215\_173\_1 Nr. of seq. 1 Alignment length(with gaps) = 173 Alignment score = 0.000000

CGCCCGCAGCGCATGCCACGCTATAAACGAGTCAACTCGCACTCGGTGTGAAACCCGGTTTCTGTAGGAGCGGACTTGTCCGCGAAAGGGCCTGTACATTCACAACATTT  
CTGCTGCCCAAACGCCCTCTTCGCGAACAAGTTCGCGCCTGCACAAGCGTCCGATTTTCGTAG

>Fam\_216\_169\_1 Nr. of seq. 1 Alignment length(with gaps) = 169 Alignment score = 0.000000

CGTAGGCCAGGTTCCACCTGGCGATGGTTGCTTGCCGGTGAACGTCCCCTTTCGATGGCTTATAAATCACGCCTCGCTTTGTTCCAAAGCATCGGCGGGATGCCATGTGT  
AACATGGCCTACGAGTGGCGATTGCAAACGCGAAATGCACTTTGCAATGGTTTCCAA

>Fam\_217\_168\_1 Nr. of seq. 1 Alignment length(with gaps) = 168 Alignment score = 0.000000

CAACTGAGCAGTGCCACCAACAACACGTCTGAAACGCTGGCCGCCACACCGAAAGCGGTCAAGGCTGCATACGACCTGGCAGCCGGCAAGGCGCCTGCCAGCCACACTCAC  
CCGTGGAGTCAGATAACGGGAGTGCCTGCGGCTTCACTGACGGCAAAAGGCACCGTA

>Fam\_218\_162\_1 Nr. of seq. 1 Alignment length(with gaps) = 162 Alignment score = 0.000000

AAAACACAAAATCACGCCAACAAGCCATTAAGGATCTAAACGAATTCTTAAAAAACAATCCCAATGACGCCAGGCCTCTAAAACCTTAGCTCAAGCTAATAAAATACAAC  
ACCTGGAGGACCTTAAATCTAAGGTTTCATTCAATAAAACCCATTGATCTTG

>Fam\_219\_159\_1 Nr. of seq. 1 Alignment length(with gaps) = 159 Alignment score = 0.000000

TTTAGCTTCTTGAACCTCTTGTGCCTCTTGTGATGTATCACTTAAATTATTTGCACTTGCTTCTTCTTTTATCGCTGCTTGTGTGCTTTCAATGCCACTGCTTTTGGTTC  
TTCATTTGATACAGCTGCACTTTTATCTGTTTCTGCTTGTGCTTCTTT

>Fam\_220\_156\_1 Nr. of seq. 1 Alignment length(with gaps) = 156 Alignment score = 0.000000

CAGACCGACGTGTTTCGCCGTCGACNACAACGGCGCGTTGAACGTNGCNTGGGTNGTCAGCGCCGANCGCTGGAACGGNCCGATTCCGATCAGCCNCGGGGCTCTTCCCG  
NCCGGCGCGGGCGGTTCGCGGCATCGAACCAGTTTCGGCATCCCGAAT

>Fam\_221\_156\_1 Nr. of seq. 1 Alignment length(with gaps) = 156 Alignment score = 0.000000

AATTTAGTGGTTGATGGAACGACTAACTTAAACAATTCTTTATCAGTAAATAATCAGTCTCCAGCCAATTTAACGGGAACATTAATGTAGATGGTGCTACAACCTTAAAT  
AATACATTTACCGTAGCAAATCAATCGCTATCACGTTTAACTGGC

>Fam\_222\_154\_1 Nr. of seq. 1 Alignment length(with gaps) = 154 Alignment score = 0.000000

ACCGGCTGATGCCTGTACTATGTGAATGATTGAACGAGTCAGTACTCGCGTTTGCCCCGCTCCTGCGGCCGCCGGATGAAAAGCCTGCCATTCGTTCGGAGAGAGAGGGCTG  
GCGCGTCAAACACGCTGAGGTTACACTGGTACGGGAATGGAGC

>Fam\_223\_150\_1 Nr. of seq. 1 Alignment length(with gaps) = 150 Alignment score = 0.000000

TGGGGCGGCATCNCCGACNCGCATGCNCCANCNCGACNACNCCGTCGCGGGTGGCGNACGNACCNACGGCGACGACGCCGTCGTCGGCGGCANCGTCGTCGACGCGCC  
GGTGGCGNNGCCGGCCAGGTCANCGNCGNCCGCGCGC

>Fam\_224\_148\_1 Nr. of seq. 1 Alignment length(with gaps) = 148 Alignment score = 0.000000

CATGTTCCACATGGCATCCACGCCGATGCTTTGGAACAAAGCGAGTCGTGTTATTTGAGTGCTCACGCAAGGTCGATGATGGTCGTCCAGTCACCCCGCCAGGTAGAACCT  
GGCCTACGTGGTTGGCTGCGTTGATTGGGTCGTAGGC

>Fam\_225\_145\_1 Nr. of seq. 1 Alignment length(with gaps) = 145 Alignment score = 0.000000

CGCTGGTCTTCTGACGGAAATGGCAGCAGCGGATCACATCCTGGCGGCCAGGGTCGGCCTGACTGCTTACAGCACGCACGGTCATTGCGAGAGCGTTGTAACCGGGGACAC  
CTGGCTAGCCTGCCGGTTCGTGAGCCATTCGCGG

>Fam\_226\_143\_1 Nr. of seq. 1 Alignment length(with gaps) = 143 Alignment score = 0.000000

ATAGGCTATTTTACTTGCCATTTTGGGCTTGAGCAGTGCGCGGCCCGTCACGTACTGGGTGTACGCTCCGTTGCCTGTGCGCTGGTCGCACCCAAACTGTCTGCGACAAT  
AACGCCTATTGGATAAGTTGGATTTTACACA

>Fam\_227\_141\_1 Nr. of seq. 1 Alignment length(with gaps) = 141 Alignment score = 0.000000

TGCCGTTGTTCGGCGNACTGGACGACNNGCGCGCTGTCNGCNGTGGACATCCGGTTCGACGCCGAGCACCTTGCCCGAGTGGNGGTTGCGGATGCGGNACCAGCCGTCGCCGT  
TGTCGATCAGCTGCCAGAGGTGGTCGTCGG

>Fam\_228\_141\_1 Nr. of seq. 1 Alignment length(with gaps) = 141 Alignment score = 0.000000

GCAGAAAGCAGCCAACCAGAAGTTCATGTCTCACCAACAGAAGAAGAAAATCCAGATGAAAGTGAAACACTAGGCACGATTGAACCAATCATACTGAAAAACCAAGTGTG  
ACAACCTGAAGAGAATGGCACAACAGAACT

>Fam\_229\_141\_1 Nr. of seq. 1 Alignment length(with gaps) = 141 Alignment score = 0.000000

GGATTGAACTCCGACCGCTCGGTTTCGTAGCCGAGTACTCTATCCAGCTGAGCTACGGATGCATCGGGAACTTACTTTACTGCAGATTTTTTGGATACCGCTACTAAAGC  
CGTATCAAGTAAGAGATGGTGCATCCGGGA

>Fam\_230\_139\_1 Nr. of seq. 1 Alignment length(with gaps) = 139 Alignment score = 0.000000

ACAACCTAAAAGTNTNAAGAATCTGNNTTGAATCACAATNAANTNACTACTCTTCCGAAAGAAGTTANGACANTGNAAAATTTACAAAAGTTGGATTTANGANNCAATA  
AACTTACGACNCTTCCNAAAGAGATAAN

>Fam\_231\_138\_1 Nr. of seq. 1 Alignment length(with gaps) = 138 Alignment score = 0.000000

GAGCGCGCCGGAGGCGCACGCTCCCAGTGCTGCCGGTGAGTGAGTCGGCGGCGTGCTCGCAGGGTATGCAGACCCGCCCTACCCTGCCCTGCACCCGCTGGGGGCAGGAA  
CCGGCGGCGCCGAATGGCGCAGGTGGG

>Fam\_232\_138\_1 Nr. of seq. 1 Alignment length(with gaps) = 138 Alignment score = 0.000000

AGGAGCGAACTTGTTTCGCGAAGGCAGTGTTTTGAACGCCAAATCTTCTGCGGCTGTACGGGCCCTTTCGCGAACAAAGCGAAGCGTCGCCCCGGTTCGCTCCTACATTTTTGTC  
CGTACGCTCAAGCATGGGGGCTTTTTGT

>Fam\_233\_138\_1 Nr. of seq. 1 Alignment length(with gaps) = 138 Alignment score = 0.000000

CAGTTAGAGCCTGCCGCGAATCGGAAGTTGAGCCAGAGCTTGAGCTGGCAAGTGAGCCAGNNGAGGAAGAAGCCTTTACCGAGCTTGATGAGCTCGATTTGCCTGAGTAC  
ACCGAAGAAGACGCCTTGGCGGATGCG

>Fam\_234\_134\_1 Nr. of seq. 1 Alignment length(with gaps) = 134 Alignment score = 0.000000

GGATTGGAACCTCCGACCGCCTGGTTTCGTAGCCAGGTACTCTATCCAGCTGAGCTAAGGACGCGCAGTTTTTCGATATCAGTATTACCAATATCAGGAGTTCACAAGGAAAC  
CCTAAAGAGTGGCGGTCCTGGA

>Fam\_235\_133\_1 Nr. of seq. 1 Alignment length(with gaps) = 133 Alignment score = 0.000000

AAGAACTTCTAGCTTTTCTCTTTTCGTTCAAAGAGAAGCAGCTGTTTCGAGTTTAATCAAACCACATAAAGCTTTTAACTTTACTCTTTGATTTAAAGAGTGATAAATGTT  
TACAGTTTAATTAATAACTGCAT

>Fam\_236\_132\_1 Nr. of seq. 1 Alignment length(with gaps) = 132 Alignment score = 0.000000

GCGCCCGCGAGGCGCAGACCACGCTGGTACCGCCTCCTCCGATGCCGCCAACCAGATCAAGGCGCTCGCCGCCGACGTGCAGCGCTCGCTCTCGCTGGCCGGCNCCACGA  
CCGCCGAGACCATCACGACCG

>Fam\_237\_132\_1 Nr. of seq. 1 Alignment length(with gaps) = 132 Alignment score = 0.000000

TTGGGCGGATACTCGTGGATAGCTCCACTCCGCACCCCCCTCCGCGCCGATCCGCGTCATTCGCGTGTATCCGCGTTCGCGATCACCCGTGCCTACTCCTGGATGCGCCGG  
ATGCACCCGGAACAACGCGGC

>Fam\_238\_132\_1 Nr. of seq. 1 Alignment length(with gaps) = 132 Alignment score = 0.000000

AATCTTGGTTTTATCTCAAATTTGATGGGAAAATAGCTGAAAAAGAATGGGTCTACGATTCTCATAGTCAAGCTTGGTACTACTTCAAATCCGGTGGTTACATGACAGCCA  
ATGAATGGATTTGGGATAAGG

>Fam\_239\_132\_1 Nr. of seq. 1 Alignment length(with gaps) = 132 Alignment score = 0.000000

TCTTCTTCAAGAGCTTCNGTANTTTCAACGTCAGATGCNACTGCTTCTTCAACAGTATNTTCTGCTATTCTTTCAGATTCTGTTGGCTCTTCAAGTTCAGAACTTTTGTCTCTTCTACTTCTGACTCAAGC

>Fam\_240\_129\_1 Nr. of seq. 1 Alignment length(with gaps) = 129 Alignment score = 0.000000

TTCAGCCCCGACGGCAAGCATCNTGGCCACCGGCAGCTCCGATCAGACCGTGC GGCTGTGGGAGACCACCACCGGCCAATGCCTGAGAATCCTGCAGGGCNACATGCCAACGGCATCTAGTCGGTGGCC

>Fam\_241\_129\_1 Nr. of seq. 1 Alignment length(with gaps) = 129 Alignment score = 0.000000

GCATCTTCTTCGTCGAACTCTGGCAGTTCCAGTTCGTCGAAGTTGAATTCTTCTTCCGCGTCAGCGCTNGGCGCTGCNGCTTGNACTTCAGCTTCTGGTAGCTCAGGCTCATCGGCCATNGATGCCAAT

>Fam\_242\_127\_1 Nr. of seq. 1 Alignment length(with gaps) = 127 Alignment score = 0.000000

TTGAATAAATAGTTTTTACCCAGAGCTTAACTGACCNGCGACTGCGCTGCTGTCACCGCCAGAGATCGCNATCCCCCAAGTAACCACCGAGCCATCATCTTTTACGGCCGCAAAGGCANTAATAG

>Fam\_243\_126\_1 Nr. of seq. 1 Alignment length(with gaps) = 126 Alignment score = 0.000000

GTCGGCGGGACGCCTGAACGAAGCAATCGCCCTGTACGAGCAGACCCTCGCCGATCGCGAGCGGCTGTTGGGAGACGAACACCCGAGCACCTGACCTCGCGAAACAACCTCGCCNGCGCCTACAN

>Fam\_244\_126\_1 Nr. of seq. 1 Alignment length(with gaps) = 126 Alignment score = 0.000000

CGATGGCGGGCGGCCAGCACGGCCTCCTTAATCGCCAGCGCTTCTTCGTAGTAGCGGGCGGGCGGTGGGGTAGTCGCCTGCGGCTTGCGCGACCTTCCCCAGTGCCTGCAGG GTGACGGCGGTCTCA

>Fam\_245\_126\_1 Nr. of seq. 1 Alignment length(with gaps) = 126 Alignment score = 0.000000

AAAGAACTAGACAATTCCTTGCTGAAAGCCATCGCTCAAAATGCCAATCGGTTTAAATCCTCAAGATATCGCCAATACCCTCTGGGCATTAGCTACCATGGGGATCAACTGGCGTGATATTCAAGAA

>Fam\_246\_126\_1 Nr. of seq. 1 Alignment length(with gaps) = 126 Alignment score = 0.000000

TAAAGCCCATAATGCGTTAGCAATACCTTGGGGTTGAATCGCTCAGCGTTGCGGCGAACAGCNCCAAGCAAGCGATCACTTAATCNTTGGTCTTCCAACCTCTCGCCACCTCATACCCATCGTGGC

>Fam\_247\_126\_1 Nr. of seq. 1 Alignment length(with gaps) = 126 Alignment score = 0.000000

AGCGGCTCGGCCTCGGCGTACTCGCCCCGCTCGGAGTACAGGAGGGCCAAGTTGTCGAGGCTCTTCGCCATCTCCGGGTGCTCCGGCCCCGAAGGCTTCTCCCGGATAGCCAAAGCGCGCCTGAAA

>Fam\_248\_126\_1 Nr. of seq. 1 Alignment length(with gaps) = 126 Alignment score = 0.000000



GCCTCCCGGTAGCGGCCCTGATCGACGTACAGAAAAGCCAGGTTGTTGAGGGTTTTGGCCACCTCGGGGTGATCAGGACCGAGGACTTTTTGGTGAATGGCCAGGGCCCCG  
TCGTACAGCGGCTCC

>Fam\_249\_126\_1 Nr. of seq. 1 Alignment length(with gaps) = 126 Alignment score = 0.000000

CCGTCCGGGGCAAACGCCACCGAGCGGATCCAGCCGGTGTGCCCNNGGAGCGTGGCGAGGCACCTTCCCGTGGCCGCATCCCAGAGTTTGACGGTGCNGTCCTGNCCGGCG  
CTTGCAGGAGGCTC

>Fam\_250\_126\_1 Nr. of seq. 1 Alignment length(with gaps) = 126 Alignment score = 0.000000

CCACCGCCGACAGCCGTGCTCCCGCCAACAGAACCCGAACCACCCAACGACTCACTAATGCCACCACCAACATGAGAACCAACACCCACACCAGTGCTCACACCCCCACCA  
ACACCGGTATGAGCA

>Fam\_251\_126\_1 Nr. of seq. 1 Alignment length(with gaps) = 126 Alignment score = 0.000000

AGGACCATCCCGACACGCTCACTTCCGCCNGCAACCTCGCCACTANCCTGAACTCCTTGGGGGAGCATGCGGAGGCNCGTCGCATGCAGGAGGATGTTCTTGCGCGTCGTG  
GTCTTGTCCTGGGTC

>Fam\_252\_126\_1 Nr. of seq. 1 Alignment length(with gaps) = 126 Alignment score = 0.000000

GGTGGTCGTCGCCGAGGGTGCGGCGTNGGCGGGTGAGGGTGTGTCNTCGANGATGCGGNGGGCTTCGGTGTGCTCGCCGAGGTTGTGCAGGGNGNCGGCGAGGTTGTGGGCGG  
ACTGGAGGGTGTGGG

>Fam\_253\_123\_1 Nr. of seq. 1 Alignment length(with gaps) = 123 Alignment score = 0.000000

TAAAAGTAACTGATTTAGTACCAGGCAGTTACCAATTTGTCGAAACAAGTGCTCCAACAGGCTACAAGTTAGACAACAGTCCAGTAAGTTTTGAAGTTGTCGCTGGTGAGA  
CAGACCAAGTAG

>Fam\_254\_123\_1 Nr. of seq. 1 Alignment length(with gaps) = 123 Alignment score = 0.000000

GTGAACCACAGGGCGCCGTCCGGCCCCGCGGTGATCCCGANCGGCCCGGCCNCGGGGTTCGGCAGCGGGTACGCGGTGATGGCCGTTCGGGGGTGATCCGGCCGATNGCGNT  
GCCCCGGTCTCG

>Fam\_255\_123\_1 Nr. of seq. 1 Alignment length(with gaps) = 123 Alignment score = 0.000000

TCTTTCAAATTGCAGGGGTGTTGTCGGCTCTCGCTTACCCGAATCACTTACCAGTGTAAGCTCATCGGGATGCACTCTTTTGCCGCCTACCTGTAATCCGAAATCTATAGG  
GGATACTTATTT

>Fam\_256\_121\_1 Nr. of seq. 1 Alignment length(with gaps) = 121 Alignment score = 0.000000

AAGTAGGCCGTATCAAGGACCAAAGGGACGCAGCTACGGCATCACCTGAACCCACAACACTCTCGCCATCCTTCCGGAACCTCACTTCGTTCCGGTCCGGCCTACAAAG  
CTTTCCAACC

>Fam\_257\_116\_1 Nr. of seq. 1 Alignment length(with gaps) = 116 Alignment score = 0.000000

CTCTCGCGGGTGGACGGGCGGGTTGAGGACGGGCCTGGCTAGCGCGCCGGGGTGGCGGGACTGGAGGCGGTGTTATCCATAACCATCAGCAAACCGTGCTGCAAGCGCGGC  
AAGCG

>Fam\_258\_116\_1 Nr. of seq. 1 Alignment length(with gaps) = 116 Alignment score = 0.000000

CCGCTTTCTTTTCGGGTATAGCGTCGTGGACAGTCATTCATCCTGCCGCCCTGTAAAAGCAAAAACCCGCCAGCTTACACTGACGGGTTTTATGAAGAGATGAAACTGACCG  
ATAAG

>Fam\_259\_115\_1 Nr. of seq. 1 Alignment length(with gaps) = 115 Alignment score = 0.000000

AGTTCCCACAGATCATTAAGTCATTTTTTCGATTCTAAAATATTCGTTTTTTATAATTTAGTTTGTAAATAGTTCCTAGAATTTCAAACCTAATTTATAAAATCTAAATTTG  
TGAG

>Fam\_260\_115\_1 Nr. of seq. 1 Alignment length(with gaps) = 115 Alignment score = 0.000000

AGGGCGAATAACCGCTCGCGGTCATCCGCCGCTCATCCGCGACATCGGCGGATAACGCCCATGGCGTTATTCGCCCTACACACCCCGAAAAAGCCGGACTGCGCCCCAGCT  
CCGT

>Fam\_261\_114\_1 Nr. of seq. 1 Alignment length(with gaps) = 114 Alignment score = 0.000000

ACCAAGGTGGGCGACGGCANGGCGCTGGCCGCCATGNTGGGCAAGGCCAACNTNTTCACCCANGTCGGCNACGGCGANNCTGGCGCTGNNGCCGGGCNAGGCCAACNTG  
NTC

>Fam\_262\_114\_1 Nr. of seq. 1 Alignment length(with gaps) = 114 Alignment score = 0.000000

TGCTTGCCGTCCACGTCGAGCCGTCCC GTTGCCGACAGCTGGTTCGGCCCGGAGCGCGGCGCCCGCTCACGGACAACGCGTCGCCGCTGGCGGCCGAACCCAGCGTGACG  
GCC

>Fam\_263\_114\_1 Nr. of seq. 1 Alignment length(with gaps) = 114 Alignment score = 0.000000

AAGAAAGCCGCGGTCGCTGCTGCTATTGCTCGTGCAAAAGCGCGTAAAGCGCAACAAGAGACTGAATCTCAACCTGTTGAAGAAACAGCTTCTCAAGAGCCAGCCGAAGAT  
CCG

>Fam\_264\_113\_1 Nr. of seq. 1 Alignment length(with gaps) = 113 Alignment score = 0.000000

CACCCCGTAGGTTCGGATAAGGCGGTTACGCCGCATCCGACATCCAACGCCCGAGCCGTTGCCTGATGCGACGCTGGCGCGTCTTATCAGGCCTACACCGCTGTGAAGTGC  
TC

>Fam\_265\_113\_1 Nr. of seq. 1 Alignment length(with gaps) = 113 Alignment score = 0.000000

CAAAAACCCGCCGAAGCGGGATTTTGTGGAATGAGTGGCGTTGACCGGTAAGCCGCTTTCTTTTATAAAAAGTGTGCGTGGACAGTCATTCCTCAGCCCTATCCTCCAA  
AG

>Fam\_266\_112\_1 Nr. of seq. 1 Alignment length(with gaps) = 112 Alignment score = 0.000000

GCGGGGACACGGATAGACGCAGATTAGGCGGATGACCGCGGATAGGTTGTCTGTAGAGCAGGTTGAAGGATGGGCCATTGGCATATCCACCAGCGGCCGTGGGCAGCATT  
G

>Fam\_267\_111\_1 Nr. of seq. 1 Alignment length(with gaps) = 111 Alignment score = 0.000000

TGGAGCAGGGCGGTGATTACCGGCTCTCTCAGCTCTCCAGCATCAGCCAGCACTGATCCCCGCTGCACCCGCACGTACGGGTCGATGTTCGGGGTTGGAGTCGGTGGCGAGC

>Fam\_268\_111\_1 Nr. of seq. 1 Alignment length(with gaps) = 111 Alignment score = 0.000000

GTGGACCTGGCCACGGATGGTGCCTGCTCAGGCTTCGGCCGGATCGGGCGGCAGGCATTGCCNTTCCGCACCTCGGTNCCCCGCGGGCAGACACAATCGCCATCCGCATC

>Fam\_269\_108\_1 Nr. of seq. 1 Alignment length(with gaps) = 108 Alignment score = 0.000000

CGCGACGATGCTCACTTTGCGCCGGCGCATCTGCCAGGGCTCGTTTCAGACACCTACGCTGGTCTTGAGCCATTTGTTGATCTGAATGCGCCGACGCCGTCCGAGTTG

>Fam\_270\_108\_1 Nr. of seq. 1 Alignment length(with gaps) = 108 Alignment score = 0.000000

AAAAACAAGCTTTTTATTGGTACACAAAAGCTGCCGAACAGGGATATGCAGNAGCACAGTTAATCTTGGTCTTATGTATTATAATGGAGATGGAATACTGGCTGAC

>Fam\_271\_105\_1 Nr. of seq. 1 Alignment length(with gaps) = 105 Alignment score = 0.000000

GGTAACAATGCCGATCCTGACGATGACAATGACAGCGTCAATGATGCACAAGATGCCTTCCCCTCGACCCAAATGAAACTGTTCGACACCGACAAAAGACGGTATC

>Fam\_272\_105\_1 Nr. of seq. 1 Alignment length(with gaps) = 105 Alignment score = 0.000000

CATTAACGGCGCCAGCTTCACAGCTTAAGCAGCAACATCGCCAACTACTTTGGGGNGATGCTTCTGTGGGTGATGACGGTACGTTTACCGGCCCGACCTATAA

>Fam\_273\_103\_1 Nr. of seq. 1 Alignment length(with gaps) = 103 Alignment score = 0.000000

GTAGGAATTCTTACGAAGCTAAATTAGAATATATGAGTATTTAAAATTCGTAATGTGACTAAAAGTGTGGAACTACCGCAAATTTGGGTTTATTGTTAAGTT

>Fam\_274\_102\_1 Nr. of seq. 1 Alignment length(with gaps) = 102 Alignment score = 0.000000

CGCGGATGTTCGGGTCCTGCGGGGAGACATACCGTCTTGGCCGGCCAGCGTCCATGGCGTACGGCGGGCGTGCCTGTCCCAGCGGGGACAGGCACACTCTGC

>Fam\_275\_101\_1 Nr. of seq. 1 Alignment length(with gaps) = 101 Alignment score = 0.000000

AATTTTGGTATGTACTCAATTTAGGCTTCACTTTAGTTTCTCCTTAGTGAAAAGTGTCTACTATAACCCTATGTATGTACCATAATTCTTTGATGATTAG

>Fam\_276\_99\_1 Nr. of seq. 1 Alignment length(with gaps) = 99 Alignment score = 0.000000

CTCGAAGAAGTGGCCGTGTCACCAGAAGAGATTGCCCAACTGAAGGCCAGGCGCCCGTGTGCGGCCAGCGCCGAACCGAACCTGAAACCCCTTCTCC

>Fam\_277\_99\_1 Nr. of seq. 1 Alignment length(with gaps) = 99 Alignment score = 0.000000

GCTTCCCAAGCAATCGGTGAGGGTTCTTATCGGACAATCGCTTTTGTGAGCGAGCTTTACTAGCAATACGTGCGGGTATAGTTGAATGGTACAACCTATT

>Fam\_278\_98\_1 Nr. of seq. 1 Alignment length(with gaps) = 98 Alignment score = 0.000000

GTGATTTGTGGGAGTTCCACATTTTAGGAATCGAGATTACAACCTTTTTTTAGAAAAATGAACCATGGATTTCTTACGTTCGAACTCACGTTAAAAATC

>Fam\_279\_97\_1 Nr. of seq. 1 Alignment length(with gaps) = 97 Alignment score = 0.000000

GAAGCCGGTTCACACAGTTTCGGCGCGCAGGCGTAACGCGCAGATCGTTCCGCCACGCAGCACTGACGCATGGCCACGCACGCGAAGCGCTCCATGCGAT

>Fam\_280\_96\_1 Nr. of seq. 1 Alignment length(with gaps) = 96 Alignment score = 0.000000

CAGGTGGGGGGCGAGGGCGGCCAGCGGTTGCTGCGCCACACCCCATCGGCAATCTCACGGCGGGCGGGCAGGGCCTCGGGCAGCAGCGCCGGCGG

>Fam\_281\_95\_1 Nr. of seq. 1 Alignment length(with gaps) = 95 Alignment score = 0.000000

TTATGGTGCGGCTATATATTTTAGTTTCAATAGGTTTATTAACCTTTTTTCAAAGTAAGAATAAGACCAAAGAAAAATCACAATCAACAAGTGA

>Fam\_282\_93\_1 Nr. of seq. 1 Alignment length(with gaps) = 93 Alignment score = 0.000000

GAAACAACGTGGGAGTTCCACAAATTTCAAGGTCTAACCCATAAATCAAAACGGCAGAAGCCACTACAATTTTTTAACAACAAGCTTCAATTA

>Fam\_283\_93\_1 Nr. of seq. 1 Alignment length(with gaps) = 93 Alignment score = 0.000000

CAGTCAAACCACTGCCCAGGTCAGCAGAAGATTCGGAGCCAGTTCTATCGGCTGGTTTATCCGAAACGAAACTGCTTAAGCTGTCCGGATTAG  
>Fam\_284\_92\_1 Nr. of seq. 1 Alignment length(with gaps) = 92 Alignment score = 0.000000  
AAAAAACACGTCATTCAAAAAGAAAATAAACTAATTAAGGATGTCGTTAATAAAGAGGTTTGGGCGGAGCCATTATATTCATGAACCTTAG  
>Fam\_285\_90\_1 Nr. of seq. 1 Alignment length(with gaps) = 90 Alignment score = 0.000000  
GCCTTGCTGGCGGCAGTGGAGCTGGCAAACAGTGAATCATGGTTTTTGGAGAAAGNGTTCACAACGGAGTTGCGTGTTCATTGCCTCGAAT  
>Fam\_286\_90\_1 Nr. of seq. 1 Alignment length(with gaps) = 90 Alignment score = 0.000000  
GCCATCAGCAATGATGGCCTTTTTGTTTACAGAAATTTGAACCTNNGGGTTCCTTATTCTAAGCGCAGCTCCTGCGCCATGTTTCATGGAAA  
>Fam\_287\_90\_1 Nr. of seq. 1 Alignment length(with gaps) = 90 Alignment score = 0.000000  
TTCTCTTTATTAGCCATTTGTTCTTGAGGTGTTACGACCATGTCGTTTACAATGCTTGGCATCTGTTTTTTCAGAGATTACAACCTTATCG  
>Fam\_288\_89\_1 Nr. of seq. 1 Alignment length(with gaps) = 89 Alignment score = 0.000000  
TCCGTGCCGCTGTGGTGCACCTACCACCCTGCCACCGGAAACACGCCGGAGGAAAGCATGCCGCAGCGCTACATCCCTCTATGCCA  
>Fam\_289\_88\_1 Nr. of seq. 1 Alignment length(with gaps) = 88 Alignment score = 0.000000  
GGTGCGAATGCAGGTGCATTCTGGCAAACCCGACAGACGCAAAGTGCGCCGGAGGCGCGCGCTCCCAGTGCTGCGCNGGGTGGTGATC  
>Fam\_290\_88\_1 Nr. of seq. 1 Alignment length(with gaps) = 88 Alignment score = 0.000000  
CAACGCGCCGCATCCGGGGTATTCCCTGCTCGCGCTGCGCTTAGCAGGGCTGCGGTTCCGTGCCGTTAGGTAGCCCGGATAAGGCG  
>Fam\_291\_88\_1 Nr. of seq. 1 Alignment length(with gaps) = 88 Alignment score = 0.000000  
CGGTACAGGTGTACACCGAACTTGTGNGAGCTTGCTCGCGAAGAGGCCCGTGCGAGTCGCTGGATGTCTGCTGGGTAGCTGCTCACCTGT  
>Fam\_292\_86\_1 Nr. of seq. 1 Alignment length(with gaps) = 86 Alignment score = 0.000000  
TTCTCCATTTGCAGAAGTGTAGAAGTAACAATCCGTCAAAGGAGACAGTGAAGGAAAGCCATAAGGCATATACGGTTCCTACTGCCCA  
>Fam\_293\_84\_1 Nr. of seq. 1 Alignment length(with gaps) = 84 Alignment score = 0.000000  
ATTATAAGATTCTATCTTTGTAGTGCTATGTGCAACTACAGCTTTTAAAATATCTAAATTGCCTTTATCTATAGCCCTATCAAT  
>Fam\_294\_82\_1 Nr. of seq. 1 Alignment length(with gaps) = 82 Alignment score = 0.000000  
TGGGACACGGATGCACGCGGATTGGGCGGATGTGCGCGGATATGGCAGAAGTACCGGTCATCCGCAGGGTGGGTATTACCGG  
>Fam\_295\_81\_1 Nr. of seq. 1 Alignment length(with gaps) = 81 Alignment score = 0.000000  
TGTTCCGGCCGGCGCTGCTCGGTCTGCTGCTGCTGGTACGCTTCTTCTGCGGGCTGCTGTTCTCTGCGGGTGCTGCC  
>Fam\_296\_81\_1 Nr. of seq. 1 Alignment length(with gaps) = 81 Alignment score = 0.000000  
GTAACAACACATGCAAACGGCCAAGTATCATACGGAGCTCGCCCGACACAAAACAAGCCAAGCAAACAAATGCATACAAC  
>Fam\_297\_79\_1 Nr. of seq. 1 Alignment length(with gaps) = 79 Alignment score = 0.000000  
TGGATGTAAGTAATTTTGATACCAAGTTCAGTAACTAATATGTATNACATGTTTAAAGATTGTAGAAATCTTGAAGAAGC  
>Fam\_298\_78\_1 Nr. of seq. 1 Alignment length(with gaps) = 78 Alignment score = 0.000000  
GTTTGTAATCCNCTACAATCANCAACATATTACTCATATNTGTCACTTGACTCGTATCAAATTTGATAACATCTAAT  
>Fam\_299\_78\_1 Nr. of seq. 1 Alignment length(with gaps) = 78 Alignment score = 0.000000  
ACGGTGATGTTGGCTGGTGTGGTGGCGGCCGGGATGTTCAACGACGGCAACGTCAACCCGGGCAGGCTGAAGGCGCCG  
>Fam\_300\_77\_1 Nr. of seq. 1 Alignment length(with gaps) = 77 Alignment score = 0.000000  
TACGAAAGCGATGATTTTTACAACCTCCGTTGAAAGCAAAGACTACGCTACGCTTGTCTTTTTGCAACATCGCTTTT  
>Fam\_301\_77\_1 Nr. of seq. 1 Alignment length(with gaps) = 77 Alignment score = 0.000000  
GATGACCTGCGCCGACGACGATGCAGAGCGTAGCGATGAGGTGGGGGCACCACCCGCTTGCGGGGGAGAGTGGCGCT  
>Fam\_302\_75\_1 Nr. of seq. 1 Alignment length(with gaps) = 75 Alignment score = 0.000000

CCCAACGGGATTGCCGGAAGTGAGTAGCCATCCGGGAACACCGTAAACGGGCCTAACCCCTCCGCCCACATCAATA  
>Fam\_303\_74\_1 Nr. of seq. 1 Alignment length(with gaps) = 74 Alignment score = 0.000000  
GTTGGTAATTATAAGCTAAAATACAATTTTGAAAGCAATTCACAACNNAATATNTATNTANTTANNATNTTNT  
>Fam\_304\_74\_1 Nr. of seq. 1 Alignment length(with gaps) = 74 Alignment score = 0.000000  
GTTTCAACCCCTCGCCCGGCATGGAAGCCGGGCGCGACGANNACNTNCCNNANGTNNNCCNTNGGCNATNGNNNN  
>Fam\_305\_73\_1 Nr. of seq. 1 Alignment length(with gaps) = 73 Alignment score = 0.000000  
TGTCTGTAGTTCCGACCTAAGGTTTTACTGTAAAAATCTTGTGATTTGTGGTAGTTCCCACGTTTTTCAAATC  
>Fam\_306\_73\_1 Nr. of seq. 1 Alignment length(with gaps) = 73 Alignment score = 0.000000  
CCGCGGAGCGGTGACAGTTGTCAGCCTCGGGTTTTCAACCCGAGGTCTCGGTTGCAAACCGCGTCCTCCAAG  
>Fam\_307\_72\_1 Nr. of seq. 1 Alignment length(with gaps) = 72 Alignment score = 0.000000  
TGCTTTAGGTGGTGNNGCTGGTNNTGAGTTGGTAAAAGCATNGGCGGTACANAAGGTGNNNCAATTGGTGC  
>Fam\_308\_72\_1 Nr. of seq. 1 Alignment length(with gaps) = 72 Alignment score = 0.000000  
GCCAGCGCCGTATCAGCAGCCGGCTTACGATCCGCATGCCGGTCAACCTGCGCCGAGGCCTATCAGCCTGA  
>Fam\_309\_72\_1 Nr. of seq. 1 Alignment length(with gaps) = 72 Alignment score = 0.000000  
GTCAGTAAAAAGTGAAGTGAATAAGGAGCATTATTCGGCAAATAAAAGAAAGATCAGCTTGCTGAACTTTCT  
>Fam\_310\_72\_1 Nr. of seq. 1 Alignment length(with gaps) = 72 Alignment score = 0.000000  
TGCGATTGAATAGTGAGCATTTTAGTTGTAGATAAAAGAACCGTCAGCGCAGCTGACAGTTCTGTGAGTAAT  
>Fam\_311\_72\_1 Nr. of seq. 1 Alignment length(with gaps) = 72 Alignment score = 0.000000  
ATAGGCGGAACATTGATTGGCCCCACCAACGCCCCCGAAGTACTCACACCCAAACCGATGGCGGGAACAGTA  
>Fam\_312\_70\_1 Nr. of seq. 1 Alignment length(with gaps) = 70 Alignment score = 0.000000  
TAAGATATTACTATCAAGTAGTGAATTATATTGAACGATATATCAATAATTGGCAGTAAATTATATTTAAA  
>Fam\_313\_70\_1 Nr. of seq. 1 Alignment length(with gaps) = 70 Alignment score = 0.000000  
GTTTAAAAAAGCGAATTTTATCGACACATAGCNAGAANGTGTGCGATGCCATAAGCATATTCGGCAACAT  
>Fam\_314\_69\_1 Nr. of seq. 1 Alignment length(with gaps) = 69 Alignment score = 0.000000  
CCACTGCCACCGTACAGCAGCAGGCCACCAAGGCCGTGACCGAACCAGGCAAGCAGGCGGCCAGCAGCG  
>Fam\_315\_69\_1 Nr. of seq. 1 Alignment length(with gaps) = 69 Alignment score = 0.000000  
GCTCAACGGAACATCCAACCCAAACGGATTAATCGCGAAACCAGGGATCGTGACCGCGCTCGTGCCCCC  
>Fam\_316\_69\_1 Nr. of seq. 1 Alignment length(with gaps) = 69 Alignment score = 0.000000  
GCTCAACGGAATACCAGGAATAGTAATATCCGGCACCACAATCGGACCGACACCACCCAGCGCGTTTCAG  
>Fam\_317\_69\_1 Nr. of seq. 1 Alignment length(with gaps) = 69 Alignment score = 0.000000  
ACTTGTTAAGCCCGTACAGTCGGAAAAAGCATACTCGCCTATTTTGGTAAGATTTGCAGGCAGGCTTAT  
>Fam\_318\_68\_1 Nr. of seq. 1 Alignment length(with gaps) = 68 Alignment score = 0.000000  
AGCGGTTGAGGGAGCTGATGTCGGTNGGATACCCAGNGCGTTGAGAGATGTCAGAATTTTCGNGC  
>Fam\_319\_68\_1 Nr. of seq. 1 Alignment length(with gaps) = 68 Alignment score = 0.000000  
ATAATTCCTTAGAGGTATGGAACANCTGTCGTGNATNNGNNAATCTNTGCAANGAATNTNGTTTCA  
>Fam\_320\_67\_1 Nr. of seq. 1 Alignment length(with gaps) = 67 Alignment score = 0.000000  
ATTTATTAAATTTGTGCTAACTGTACAAAATATATTGATTAAGTTTAGATTAGTGATAAAAAGATAT  
>Fam\_321\_67\_1 Nr. of seq. 1 Alignment length(with gaps) = 67 Alignment score = 0.000000

AGATAATATCCTAATCAAATTCTAGTCATTTAAACATAACATCATAAGTAATTTATCTGACAAATTA  
>Fam\_322\_67\_1 Nr. of seq. 1 Alignment length(with gaps) = 67 Alignment score = 0.000000  
GTTTTAGAGCTATGCTGTTTTGAATGGTCCCAAACTGNGCATANGGANNACTTAATTGCGCTTTNT  
>Fam\_323\_66\_1 Nr. of seq. 1 Alignment length(with gaps) = 66 Alignment score = 0.000000  
AATTCCATAAGGTACAATTAATACACNAGGCNTNNGCGTNTNCATNNTTNNNNNACNTATATTTTC  
>Fam\_324\_66\_1 Nr. of seq. 1 Alignment length(with gaps) = 66 Alignment score = 0.000000  
GCAACCAGATCACCGACATTGCGCCGCTCGCATCGCTCAAATCGCTCACGGAECTCTNGCTCTCCA  
>Fam\_325\_66\_1 Nr. of seq. 1 Alignment length(with gaps) = 66 Alignment score = 0.000000  
TTACTGCTTCTAAACAAATTTNTTCTGTTTGNNTTNTTACATANTNTAAAGCTTTATAATTTTGT  
>Fam\_326\_66\_1 Nr. of seq. 1 Alignment length(with gaps) = 66 Alignment score = 0.000000  
TTTACATAACCACATAGTTAATATAAAAACNANAANTATTTNTAGGGAANATACTTNGTTATNNAACC  
>Fam\_327\_66\_1 Nr. of seq. 1 Alignment length(with gaps) = 66 Alignment score = 0.000000  
TACCACTTAGTTAATATAAAAACNNATTANTACTNTNANANNNTAGNNNACNTANTNNNATTTACA  
>Fam\_328\_66\_1 Nr. of seq. 1 Alignment length(with gaps) = 66 Alignment score = 0.000000  
GAGGCCAGCCAGGGGGCGAGGTCCGGTGACCGCAGTGTAGCTGAGAGTGAGGTTTTGGAGGTTTTTC  
>Fam\_329\_66\_1 Nr. of seq. 1 Alignment length(with gaps) = 66 Alignment score = 0.000000  
GCTCTAAACTGACNATNATGACTNAATAGCTTTTCANNNGTTTTGGAACCATTCGAAACAACACA  
>Fam\_330\_66\_1 Nr. of seq. 1 Alignment length(with gaps) = 66 Alignment score = 0.000000  
TTCCTTAGAGGTATGGAACAGACNTNCTATCTTNTAGNNTCGAAACNNNTTCTACGTTTCAATAC  
>Fam\_331\_66\_1 Nr. of seq. 1 Alignment length(with gaps) = 66 Alignment score = 0.000000  
TTTGAGAGTTGTGTAATTTAAGATGGATCTCAAACNNNNTNNAANTNNNNNATNNGNNAATNNNNNG  
>Fam\_332\_65\_1 Nr. of seq. 1 Alignment length(with gaps) = 65 Alignment score = 0.000000  
GTTTTAGAGCTGTGCTGTTTCGAATGGTTCCAAAACNNNTNCTNNTNNTTNAATTTGNANAGNNT  
>Fam\_333\_64\_1 Nr. of seq. 1 Alignment length(with gaps) = 64 Alignment score = 0.000000  
AAGATTTTGATATGAAATTAATAAATGCAGTAGTTCCCACAGAATTACGCCTCTTAGAACGATC  
>Fam\_334\_64\_1 Nr. of seq. 1 Alignment length(with gaps) = 64 Alignment score = 0.000000  
GTGTGGGACGGGGCCATGGAACNGNAGNAGNGCGNCCNATCNGGCANGNACTCTACCATGGCG  
>Fam\_335\_63\_1 Nr. of seq. 1 Alignment length(with gaps) = 63 Alignment score = 0.000000  
GCACGCGCGGGGCTGGTCCNACGGGTGCAGCCGCATGNCCCAGGCGGCGGCGTGTGTGTCCTCC  
>Fam\_336\_63\_1 Nr. of seq. 1 Alignment length(with gaps) = 63 Alignment score = 0.000000  
AAACATGGGAGCGCTCTCATCCATTAGAACC GCCTGTTTCTCCCGGAGACTTTGCCCCAC  
>Fam\_337\_63\_1 Nr. of seq. 1 Alignment length(with gaps) = 63 Alignment score = 0.000000  
GAACAGGCCCGCCGCGAAGCCGAGGCGCGGGCGGCGGAAGCGGCAGCAGAGCTGTGCGCCGAA  
>Fam\_338\_63\_1 Nr. of seq. 1 Alignment length(with gaps) = 63 Alignment score = 0.000000  
GGTTTATCCCCGCTGGCGCGGGGAACACNACGGCTCNGCAANAGCAGNACCCNTGTCAGCTC  
>Fam\_339\_63\_1 Nr. of seq. 1 Alignment length(with gaps) = 63 Alignment score = 0.000000  
ACGAAAGTTTTGATGAATCAACAAGTGTGAGTTACAAAGAGACGTAATGTTGCGGGAECTCCC  
>Fam\_340\_63\_1 Nr. of seq. 1 Alignment length(with gaps) = 63 Alignment score = 0.000000

CTAACATCTAAATTTGTAACTGATTNNTAGNACAAGCCAAATNNNCTAAAGCNGGATTTTTTA  
>Fam\_341\_63\_1 Nr. of seq. 1 Alignment length(with gaps) = 63 Alignment score = 0.000000  
AGTGAGGTAAGTTNATTTTCGGAACAGTCCAGTTCCTNTAAAGCNGTTAANCCCTGTACATCG  
>Fam\_342\_62\_1 Nr. of seq. 1 Alignment length(with gaps) = 62 Alignment score = 0.000000  
GGGCTGGTCCCACGANNGCCAGCGCCCGCNGCNCNNCNGNTNNGTCGTCCCCGCGTACGCG  
>Fam\_343\_62\_1 Nr. of seq. 1 Alignment length(with gaps) = 62 Alignment score = 0.000000  
GGGATAAACCGNACTGNCAGNNNGTGNCNNCNCNNAACNNGTNANGAGTTCCTCCCGCGCCAGCG  
>Fam\_344\_62\_1 Nr. of seq. 1 Alignment length(with gaps) = 62 Alignment score = 0.000000  
GTTTCAGAAGTATGTTAAATCAATAAGGTTAAGACCNNATANTANTNAAANTNNNNATNNA  
>Fam\_345\_61\_1 Nr. of seq. 1 Alignment length(with gaps) = 61 Alignment score = 0.000000  
CGGTTTATCCCCGCTGGCGCGGGAACTCTAGNTGTCNNGCATTNCANCCGGCTNCNGCNG  
>Fam\_346\_61\_1 Nr. of seq. 1 Alignment length(with gaps) = 61 Alignment score = 0.000000  
GCGCGGGGAACACNNNNNNNCAANNTNNNNNTNCNANNANCNTNCGGTTTATCCCCGCTG  
>Fam\_347\_61\_1 Nr. of seq. 1 Alignment length(with gaps) = 61 Alignment score = 0.000000  
TTTCTAAGCTGCCTGTGCGGCAGTGAACATAANGTNAANNATAGCANTCGANTTCCACAG  
>Fam\_348\_61\_1 Nr. of seq. 1 Alignment length(with gaps) = 61 Alignment score = 0.000000  
GTTCACTGCCGCACAGGCAGCTTAGAAACCGANATNATCANTTCTANNTNNGTTCTTTNCN  
>Fam\_349\_60\_1 Nr. of seq. 1 Alignment length(with gaps) = 60 Alignment score = 0.000000  
AAAAGGCGGAGAAAGCCACTAGCAAAAACCATGACAAAGAATTCTATCAAGAAATCGGTGA  
>Fam\_350\_60\_1 Nr. of seq. 1 Alignment length(with gaps) = 60 Alignment score = 0.000000  
ATACTGTCATTGAGGACAATCGCGGTAATAGGAAAACCATCAAGAAAGACATCTTTGGAG  
>Fam\_351\_60\_1 Nr. of seq. 1 Alignment length(with gaps) = 60 Alignment score = 0.000000  
GGCGACCGTGACCGCGGCGGCTTCCGCCCGCGAAGACCGTGGCGAGCGCAGCTTCGGC  
>Fam\_352\_60\_1 Nr. of seq. 1 Alignment length(with gaps) = 60 Alignment score = 0.000000  
GTTCACTGCCGTACAGGCAGCTTAGAAANGAANNCGGNNNNANNGCAGNCGNATNNN  
>Fam\_353\_60\_1 Nr. of seq. 1 Alignment length(with gaps) = 60 Alignment score = 0.000000  
CCGCATACGCGGGGTGATCCCCGATCNCNTANNGNNGNTNNAANGCNTNNTNANGTATTTT  
>Fam\_354\_60\_1 Nr. of seq. 1 Alignment length(with gaps) = 60 Alignment score = 0.000000  
CATCCCCGCGCATGCGGGGAACAGNCGGCCAAGGCNNNCNNNGCNGNTNNGGGCGGTT  
>Fam\_355\_60\_1 Nr. of seq. 1 Alignment length(with gaps) = 60 Alignment score = 0.000000  
CCCGCGTGTGCGGGGAACAGNGTNGCCNNNNCNGCNGANNNGCNGCNGANCGGTTTCATC  
>Fam\_356\_60\_1 Nr. of seq. 1 Alignment length(with gaps) = 60 Alignment score = 0.000000  
GTTTATCCCCGCTGGCGCGGGGAACACNGAAACGCCGTNTNCGCGACCTCGTGANGANCG  
>Fam\_357\_60\_1 Nr. of seq. 1 Alignment length(with gaps) = 60 Alignment score = 0.000000  
GTTTATCCCCGCTGGCGCGGGGAACACNNTNNTNCTNATNNTANNNGNANNANCNGNCG  
>Fam\_358\_60\_1 Nr. of seq. 1 Alignment length(with gaps) = 60 Alignment score = 0.000000  
CTTTAACTTAAAGTTATTAGAGCCTCTTATGCAGTTGCTCAGTCAACTGTATACCTTTTGC  
>Fam\_359\_60\_1 Nr. of seq. 1 Alignment length(with gaps) = 60 Alignment score = 0.000000

CTTTAACCCAACCAGTAGCCATTGAACCTGATTCGTTTAAGTAATACCATAAGCCTTTGT  
>Fam\_360\_59\_1 Nr. of seq. 1 Alignment length(with gaps) = 59 Alignment score = 0.000000  
CCTCCGGCGCGCTCATCACCCGGCAACTTCTCGTGAGGCGCAGACTGGGAGCGCGCG  
>Fam\_361\_59\_1 Nr. of seq. 1 Alignment length(with gaps) = 59 Alignment score = 0.000000  
CCGGCTTCCAGAGGGGTGCGCCGGAGGCGCGCTCCCAGCTTGCAGGCGAGCGCGTGC  
>Fam\_362\_59\_1 Nr. of seq. 1 Alignment length(with gaps) = 59 Alignment score = 0.000000  
GTTCACTGCCGTACAGGCAGCTTAGAAAANGCANCNTGNNGATNCGCGNTNNTNNCNNN  
>Fam\_363\_59\_1 Nr. of seq. 1 Alignment length(with gaps) = 59 Alignment score = 0.000000  
GGGCCCAACACAGAAGCTGGCCAATAGTCAGCTTCAATAATGTGCAAGTTGGGGTAA  
>Fam\_364\_58\_1 Nr. of seq. 1 Alignment length(with gaps) = 58 Alignment score = 0.000000  
GTGTTCCCGCATGCGCGGGGATGAACCGNNNNCNGNCNNNNCNGNCCNGNCNGNNGN  
>Fam\_365\_58\_1 Nr. of seq. 1 Alignment length(with gaps) = 58 Alignment score = 0.000000  
GCCCGACGACGATGCAGAGCGCGCAGCGGATGAGAAGGAGTTGGGCGGTTAGGTCGA  
>Fam\_366\_58\_1 Nr. of seq. 1 Alignment length(with gaps) = 58 Alignment score = 0.000000  
TCGTGCGCGAGCTCGATTTGATTGCCCGGCTCCTCCTCACCCCGTTACCCGGGGCGCA  
>Fam\_367\_58\_1 Nr. of seq. 1 Alignment length(with gaps) = 58 Alignment score = 0.000000  
CGTGGGGATAGACCCNCNCGNCNNNTCNGNCCANGCGNNGGCGGTTCCCCCGCACT  
>Fam\_368\_57\_1 Nr. of seq. 1 Alignment length(with gaps) = 57 Alignment score = 0.000000  
GGTGCGGGGGCGGAAACCGCCGCGCCGAAGCTTCTCGGCAACGCAGTGGCGCCC  
>Fam\_369\_57\_1 Nr. of seq. 1 Alignment length(with gaps) = 57 Alignment score = 0.000000  
TCTACCACAAGTGATAGCACGGACACATCAGCTTCAAGCGACAGTACAGATACTACC  
>Fam\_370\_57\_1 Nr. of seq. 1 Alignment length(with gaps) = 57 Alignment score = 0.000000  
GGATCACCTCCACATACGTGGAGAAAANCATTTNNTNTNACNAAAANTCNGNATNGA  
>Fam\_371\_57\_1 Nr. of seq. 1 Alignment length(with gaps) = 57 Alignment score = 0.000000  
GTTTTCCCGCACATGCGGGGTGATCCCGNNAATNCNANTNTTNCAGCGNCAANN  
>Fam\_372\_57\_1 Nr. of seq. 1 Alignment length(with gaps) = 57 Alignment score = 0.000000  
TTCAGTGAGATGTCTTACCTCAGTTTATGGAGCGTCAGCTTGCCACCAGCAAGATG  
>Fam\_373\_56\_1 Nr. of seq. 1 Alignment length(with gaps) = 56 Alignment score = 0.000000  
TGATCGACGTGCTGGCGAGGGACGAGCCGGTAGGAGATCAGGCAGTCGGCACGGCC  
>Fam\_374\_56\_1 Nr. of seq. 1 Alignment length(with gaps) = 56 Alignment score = 0.000000  
GGGCGGGTTAGGGTGGGGCGTATCGCAACCCACACGGCAGACCCGGCTACCGTA  
>Fam\_375\_56\_1 Nr. of seq. 1 Alignment length(with gaps) = 56 Alignment score = 0.000000  
CCGGCCCGCATCGTCACACGGCCTAAGCCCATTGCCGTCCTCCTCAACGGGCCGAC  
>Fam\_376\_56\_1 Nr. of seq. 1 Alignment length(with gaps) = 56 Alignment score = 0.000000  
TGCAAGTTGGCGGGGCCCCAACATAGAGAAATTTGGATCACCAATTTCAACAGACAA  
>Fam\_377\_55\_1 Nr. of seq. 1 Alignment length(with gaps) = 55 Alignment score = 0.000000  
AGATAAACTTCAATATGGGTTTAACTTGTGGTTAATAGAGTAAGAGTGTAATAG  
>Fam\_378\_55\_1 Nr. of seq. 1 Alignment length(with gaps) = 55 Alignment score = 0.000000



TATGATGAAAGATGGATTTAATGTATAAGGAATCAATGAANTTACAAAAAGANCT

>Fam\_379\_54\_1 Nr. of seq. 1 Alignment length(with gaps) = 54 Alignment score = 0.000000  
CCATATAGATAGTCCGTACCTGTATTAGAAATTAGTGTGTCATTCCCATCACCA

>Fam\_380\_54\_1 Nr. of seq. 1 Alignment length(with gaps) = 54 Alignment score = 0.000000  
GTGCAGAGCCAGAACGGCGCCAATATCGGCTCGGGCGCCAATGGCATCAGCGTC

>Fam\_381\_54\_1 Nr. of seq. 1 Alignment length(with gaps) = 54 Alignment score = 0.000000  
TGTCGTTGCCGGCGCCACCATCAAGGGTGTCCGCACCTGCACCACCNTAAAGCG

>Fam\_382\_51\_1 Nr. of seq. 1 Alignment length(with gaps) = 51 Alignment score = 0.000000  
CGGCGAGCGGGGCGGGAGTTTGAGCGAGAACCACGGGCACGGCGCGATAG

>Fam\_383\_51\_1 Nr. of seq. 1 Alignment length(with gaps) = 51 Alignment score = 0.000000  
TACTTATTAATAGCATTTAGATATTAATTGTATTTACCTATTTGAGTGAAT

>Fam\_384\_51\_1 Nr. of seq. 1 Alignment length(with gaps) = 51 Alignment score = 0.000000  
CTAGTAAGATATACTAATATATAAATACTTAAATTTAATTTTATTTAAACA

>Fam\_385\_51\_1 Nr. of seq. 1 Alignment length(with gaps) = 51 Alignment score = 0.000000  
GTACAAGCAAACAAGAAGCCAACAGTACCAAAAACTAATCAAACAACCA

>Fam\_386\_50\_1 Nr. of seq. 1 Alignment length(with gaps) = 50 Alignment score = 0.000000  
TATTATAGATGAATATTAATATTGATATTCTAGGTAATTGCTAGAGCTAA

>Fam\_387\_49\_1 Nr. of seq. 1 Alignment length(with gaps) = 49 Alignment score = 0.000000  
GCATGGGATCGGGCAAGCGCCGAAGCGCTAACTCCGATCGACAGCTTT

>Fam\_388\_49\_1 Nr. of seq. 1 Alignment length(with gaps) = 49 Alignment score = 0.000000  
CCCATGCTTCACGCTCGACCAGAGTTGGCGCTTGAGCACTTACTCTGGT

>Fam\_389\_49\_1 Nr. of seq. 1 Alignment length(with gaps) = 49 Alignment score = 0.000000  
AATCTTAGAAAATGTAGGAATACTACTTTCAAACAAGAACCAGCAATC

>Fam\_390\_48\_1 Nr. of seq. 1 Alignment length(with gaps) = 48 Alignment score = 0.000000  
GCAACCACGCCGGTACGTCGCTACCCGCCGCTGGAGCNGCCTCTTCCC

>Fam\_391\_48\_1 Nr. of seq. 1 Alignment length(with gaps) = 48 Alignment score = 0.000000  
GCTGCTGAACTGCCCCGACTCGATGCTGACGAACTAGCAGCACTGGAT

>Fam\_392\_48\_1 Nr. of seq. 1 Alignment length(with gaps) = 48 Alignment score = 0.000000  
AAACCTGGGACTACCGAACCCGAGAAACCCGGAGTCACCGAACCGAA

>Fam\_393\_48\_1 Nr. of seq. 1 Alignment length(with gaps) = 48 Alignment score = 0.000000  
TGTAGGCGGTGATGAAGACTGGCTGTGCTGCCACTGCTGCTACTGTC

>Fam\_394\_48\_1 Nr. of seq. 1 Alignment length(with gaps) = 48 Alignment score = 0.000000  
ACCATCTTGACAGCGGTGTAGTTGCAAGTCTTGGTGCGGCACTCAGGA

>Fam\_395\_48\_1 Nr. of seq. 1 Alignment length(with gaps) = 48 Alignment score = 0.000000  
GTGTAGTTGATCACTTTCGTACGAGTTTCGTACACAGGCTTCTTGACT

>Fam\_396\_48\_1 Nr. of seq. 1 Alignment length(with gaps) = 48 Alignment score = 0.000000  
GTGCTTGCTGAGGCTGAAGCACTTGTGAGGCTGACTCAGATGCNGAT

>Fam\_397\_48\_1 Nr. of seq. 1 Alignment length(with gaps) = 48 Alignment score = 0.000000

TGAAGCACTTTGGCTTGCNCTTGTTGANGCGGACTTAGACGCGCTTGT

>Fam\_398\_47\_1 Nr. of seq. 1 Alignment length(with gaps) = 47 Alignment score = 0.000000  
TTTTCAAAGTTAGTCCGTAATAACAGATTTGTGGGAACTATTACAC

>Fam\_399\_45\_1 Nr. of seq. 1 Alignment length(with gaps) = 45 Alignment score = 0.000000  
CATATGGATTTTGTGATATTGTTGTTCTTGGTTTTGTGGTGCTA

>Fam\_400\_45\_1 Nr. of seq. 1 Alignment length(with gaps) = 45 Alignment score = 0.000000  
AACGGAACCCAGTACGAAAGAAACCAGCAGGAAGAACCCAAGCAC

>Fam\_401\_45\_1 Nr. of seq. 1 Alignment length(with gaps) = 45 Alignment score = 0.000000  
AAGTAAGAAATTTAGGAAGTAGGAAGTTTAGTAATAATTTGTAGT

>Fam\_402\_45\_1 Nr. of seq. 1 Alignment length(with gaps) = 45 Alignment score = 0.000000  
AAAGAAAATAATTAATATAGAGTAAATCTATTGCAATGAATTAAC

>Fam\_403\_45\_1 Nr. of seq. 1 Alignment length(with gaps) = 45 Alignment score = 0.000000  
TTTTTATTATCTGTTGACTTATCTTCTTCTGGGGTCTGCTCTGGC

>Fam\_404\_45\_1 Nr. of seq. 1 Alignment length(with gaps) = 45 Alignment score = 0.000000  
AATTAGTTTATTATACTTCTTTAGATTAATTTCTATACTTCCTA

>Fam\_405\_45\_1 Nr. of seq. 1 Alignment length(with gaps) = 45 Alignment score = 0.000000  
CGGGAGCTGCAGGCCCGGCAGGNCCACAGGGACCGAAAGGGGATA

>Fam\_406\_45\_1 Nr. of seq. 1 Alignment length(with gaps) = 45 Alignment score = 0.000000  
GTCGGAACCTGGAGTCCACAGCGCTTGAACCTTCCGAACTAGAATC

>Fam\_407\_45\_1 Nr. of seq. 1 Alignment length(with gaps) = 45 Alignment score = 0.000000  
CAGGGATTACCNGGACCTAAAGGAGACCAAGGGGAGGCAGGACCG

>Fam\_408\_45\_1 Nr. of seq. 1 Alignment length(with gaps) = 45 Alignment score = 0.000000  
TGCTTGTCTGATTTTGCTGATCCTGGTTCTGTTGATCTTTGTTT

>Fam\_409\_45\_1 Nr. of seq. 1 Alignment length(with gaps) = 45 Alignment score = 0.000000  
CTGATCGAACGTTCTGGCCGCGTTGCTGAAGGTGGCTCCGATCGT

>Fam\_410\_44\_1 Nr. of seq. 1 Alignment length(with gaps) = 44 Alignment score = 0.000000  
CGCCGTACGCGGCTCTCCCGCCATCGCTCCGGGTACCCCTCCT

>Fam\_411\_43\_1 Nr. of seq. 1 Alignment length(with gaps) = 43 Alignment score = 0.000000  
GAGCACTGCTCACNNGCGGCGCCGCGGNAGTGCTCNGCNTCGA

>Fam\_412\_42\_1 Nr. of seq. 1 Alignment length(with gaps) = 42 Alignment score = 0.000000  
CCCGCAAACCTTCGAGGGAGTCTGGCCCGAAGGGGGACAGGCA

>Fam\_413\_42\_1 Nr. of seq. 1 Alignment length(with gaps) = 42 Alignment score = 0.000000  
AACAGCACGGCGANCGGGACGAACCTCGACCGCGTCGGGCGAG

>Fam\_414\_42\_1 Nr. of seq. 1 Alignment length(with gaps) = 42 Alignment score = 0.000000  
AGCACGGCAACGGGCCAAGGNTCGCAAGCGACGGGNNGCAAC

>Fam\_415\_42\_1 Nr. of seq. 1 Alignment length(with gaps) = 42 Alignment score = 0.000000  
TCGCTGTGACGGGGCTCAGCACGACGAACAGCAGCGTCGCG

>Fam\_416\_42\_1 Nr. of seq. 1 Alignment length(with gaps) = 42 Alignment score = 0.000000

ATTTCTATCTCCTCACTCCTATCTCTTACCCTCTCACTCCT  
>Fam\_417\_42\_1 Nr. of seq. 1 Alignment length(with gaps) = 42 Alignment score = 0.000000  
GAAGAGCAGGCGCGGCGCAAGCCGAGGCGCGCTGCTGCC  
>Fam\_418\_42\_1 Nr. of seq. 1 Alignment length(with gaps) = 42 Alignment score = 0.000000  
CTTGCATATCGCTAATAGTGCCATTACTACTGATACTGC  
>Fam\_419\_42\_1 Nr. of seq. 1 Alignment length(with gaps) = 42 Alignment score = 0.000000  
TTGCTTGTTAGTATTAGTATTTCAATTGTCAATATTAGTGTT  
>Fam\_420\_42\_1 Nr. of seq. 1 Alignment length(with gaps) = 42 Alignment score = 0.000000  
TAAAAAATAATTGAGTTAATTATGCATTAGATGTATATTATA  
>Fam\_421\_42\_1 Nr. of seq. 1 Alignment length(with gaps) = 42 Alignment score = 0.000000  
TCAGCTTTTGGATNTNATAATANAGCTANTGGANTNNATAGT  
>Fam\_422\_42\_1 Nr. of seq. 1 Alignment length(with gaps) = 42 Alignment score = 0.000000  
TGGCGCTCGGCNCCGGTGCAGGCCACCNCGTCAACGNCG  
>Fam\_423\_42\_1 Nr. of seq. 1 Alignment length(with gaps) = 42 Alignment score = 0.000000  
TGCGGCCAAACCGCTGCCAAGGCGACCGCTGCCGCCAAGCC  
>Fam\_424\_42\_1 Nr. of seq. 1 Alignment length(with gaps) = 42 Alignment score = 0.000000  
GGACAAGAAGCGGGCCCCGCGCCCCGGTGTGCCGGCTCGCGG  
>Fam\_425\_42\_1 Nr. of seq. 1 Alignment length(with gaps) = 42 Alignment score = 0.000000  
TCCGCGCCCGCTCCCGTCCCTCCGAACCCGCATCCGGGCCT  
>Fam\_426\_41\_1 Nr. of seq. 1 Alignment length(with gaps) = 41 Alignment score = 0.000000  
AATTAAAAGTGAATGGAGAGTAAGAATAAGTTCTAATGAAG  
>Fam\_427\_40\_1 Nr. of seq. 1 Alignment length(with gaps) = 40 Alignment score = 0.000000  
TTAATCTATAGTATAATAGTTTAATTTGAAGTACAACGAT  
>Fam\_428\_39\_1 Nr. of seq. 1 Alignment length(with gaps) = 39 Alignment score = 0.000000  
GCTTCTGCTTGNCGTTTNGCTTCAGCNGCTTTTTTGTCT  
>Fam\_429\_39\_1 Nr. of seq. 1 Alignment length(with gaps) = 39 Alignment score = 0.000000  
TAAGCAACAAAGTNCTAAACAAGANGATTCTCTCAGGA  
>Fam\_430\_39\_1 Nr. of seq. 1 Alignment length(with gaps) = 39 Alignment score = 0.000000  
TTATCTTTAGATTTCCACCAATCGTCATCACAATTGTGC  
>Fam\_431\_39\_1 Nr. of seq. 1 Alignment length(with gaps) = 39 Alignment score = 0.000000  
TGCTCTTCTTGCTTACGTTTTTCTTCTTCTACTCTTTGC  
>Fam\_432\_39\_1 Nr. of seq. 1 Alignment length(with gaps) = 39 Alignment score = 0.000000  
ATTCCCCTCCTCTGGAGGGGTGCCCGTCAGGGCAGTTTT  
>Fam\_433\_39\_1 Nr. of seq. 1 Alignment length(with gaps) = 39 Alignment score = 0.000000  
TCCCAGGTATCTCGGTGCGTGCAGGCGGAGGCGTGCGC  
>Fam\_434\_39\_1 Nr. of seq. 1 Alignment length(with gaps) = 39 Alignment score = 0.000000  
CTTTGAATATTCTACAAGACTATAGATTAGTTTAAATCC  
>Fam\_435\_39\_1 Nr. of seq. 1 Alignment length(with gaps) = 39 Alignment score = 0.000000

GCAGATATAAGGGAAGTATTGAGGGAAGTTGGGAAGAAG

>Fam\_436\_39\_1 Nr. of seq. 1 Alignment length(with gaps) = 39 Alignment score = 0.000000  
CCGCCGTCTAAACCATCAACACCTTCTAGCTCAGTGACA

>Fam\_437\_39\_1 Nr. of seq. 1 Alignment length(with gaps) = 39 Alignment score = 0.000000  
TATGTGAAGTTCAAGCCATTTGAAGTCGCGGGTCACCCA

>Fam\_438\_39\_1 Nr. of seq. 1 Alignment length(with gaps) = 39 Alignment score = 0.000000  
GCGGCGACGACCGGCGGAGACAGCGGCCACCGTCGAGA

>Fam\_439\_38\_1 Nr. of seq. 1 Alignment length(with gaps) = 38 Alignment score = 0.000000  
GGGGAGCGACATCTGCGGCCAGGGAGCCTGTCCCTGCC

>Fam\_440\_38\_1 Nr. of seq. 1 Alignment length(with gaps) = 38 Alignment score = 0.000000  
AAAATATTTAAATAATATATCATAATACAGAGTGANGA

>Fam\_441\_38\_1 Nr. of seq. 1 Alignment length(with gaps) = 38 Alignment score = 0.000000  
GTCGCACGATAGTCGAGATTACGGCCTGCCGACGCGGC

>Fam\_442\_36\_1 Nr. of seq. 1 Alignment length(with gaps) = 36 Alignment score = 0.000000  
CCGCAGAAGAGGCGCGTATTGCTGCCGAGGCCCGTG

>Fam\_443\_36\_1 Nr. of seq. 1 Alignment length(with gaps) = 36 Alignment score = 0.000000  
AAAACCTGATACGGGAGGAAATCCAGACACAGGAGG

>Fam\_444\_36\_1 Nr. of seq. 1 Alignment length(with gaps) = 36 Alignment score = 0.000000  
ACCGGAGCAACAGGCCCGACTGGAATAACGGGCCCA

>Fam\_445\_36\_1 Nr. of seq. 1 Alignment length(with gaps) = 36 Alignment score = 0.000000  
CCAGTCGGTCCAGTAATACCAGTCCTTCCAGTAACA

>Fam\_446\_36\_1 Nr. of seq. 1 Alignment length(with gaps) = 36 Alignment score = 0.000000  
GCGGGTTCACCTCGGGGCTCGACCGCAGCGCCTTCT

>Fam\_447\_36\_1 Nr. of seq. 1 Alignment length(with gaps) = 36 Alignment score = 0.000000  
GCGAGACGGTCCGGTGTTGCCGTTTCCGTTGGTGTCG

>Fam\_448\_36\_1 Nr. of seq. 1 Alignment length(with gaps) = 36 Alignment score = 0.000000  
TACTCATTTAAAGCGACTACTATAGAGTAGATAAAAAT

>Fam\_449\_36\_1 Nr. of seq. 1 Alignment length(with gaps) = 36 Alignment score = 0.000000  
TCTATATTTATATCTGGTTTTCCATCCCCATCTGTA

>Fam\_450\_36\_1 Nr. of seq. 1 Alignment length(with gaps) = 36 Alignment score = 0.000000  
GGTGGATTTANCACTGCATCATCCATTGGTGGCACT

>Fam\_451\_36\_1 Nr. of seq. 1 Alignment length(with gaps) = 36 Alignment score = 0.000000  
CAAGTGGCGAACCAGACAAAGATAAAGAACCAGATG

>Fam\_452\_36\_1 Nr. of seq. 1 Alignment length(with gaps) = 36 Alignment score = 0.000000  
CACAGAAGAAAAGCGGCCAAGAAACATAAGAAGTCG

>Fam\_453\_36\_1 Nr. of seq. 1 Alignment length(with gaps) = 36 Alignment score = 0.000000  
TGGTTGCTCAGGTTGACCCGTTCTTCCGGTTGACT

>Fam\_454\_36\_1 Nr. of seq. 1 Alignment length(with gaps) = 36 Alignment score = 0.000000

```

GGCCTTGCCCTGGGCCTGCTGGTCGGTGGTGGTGCT
>Fam_455_36_1 Nr. of seq. 1 Alignment length(with gaps) = 36 Alignment score = 0.000000
GCCATACCGGGGTGAGGCGGCAAACCAGGACGAGGA
>Fam_456_36_1 Nr. of seq. 1 Alignment length(with gaps) = 36 Alignment score = 0.000000
GCAGATAAAAAAGCAGCAGCTGAAAGGAAGGCCGCT
>Fam_457_36_1 Nr. of seq. 1 Alignment length(with gaps) = 36 Alignment score = 0.000000
CAAGTACGTCNGCNTCNACGAGTGCATCAGTAAGNG
>Fam_458_34_1 Nr. of seq. 1 Alignment length(with gaps) = 34 Alignment score = 0.000000
TCGAGCGCCCATAGAAGCGAGATGCTGAGTTATT
>Fam_459_33_1 Nr. of seq. 1 Alignment length(with gaps) = 33 Alignment score = 0.000000
TATTACAAAAACAGAGACAACAGAACTGGTGGGA
>Fam_460_33_1 Nr. of seq. 1 Alignment length(with gaps) = 33 Alignment score = 0.000000
ATGGTTTCTCCCCATCTGGTATCTGACCATCTG
>Fam_461_33_1 Nr. of seq. 1 Alignment length(with gaps) = 33 Alignment score = 0.000000
CTACTGGGTCTCCTATAAATTTCCCTTGGAATT
>Fam_462_33_1 Nr. of seq. 1 Alignment length(with gaps) = 33 Alignment score = 0.000000
GAATTTAAAAGATGANGCAGNAGNAAAAGCAGAG
>Fam_463_33_1 Nr. of seq. 1 Alignment length(with gaps) = 33 Alignment score = 0.000000
GGTTTACTTGGTTCAGTCGTCCCTGGCTCACCT
>Fam_464_33_1 Nr. of seq. 1 Alignment length(with gaps) = 33 Alignment score = 0.000000
GGTCAGCTTTTGTCCACTGCATCAATACGCTG
>Fam_465_33_1 Nr. of seq. 1 Alignment length(with gaps) = 33 Alignment score = 0.000000
CGATGAGCCGCTTGCGCGAAGAGGTTTCAGGGCC
>Fam_466_33_1 Nr. of seq. 1 Alignment length(with gaps) = 33 Alignment score = 0.000000
ACCCCGCCCGACGATAGCGGCGATGACGATGTG
>Fam_467_32_1 Nr. of seq. 1 Alignment length(with gaps) = 32 Alignment score = 0.000000
TTCGGACCGCGGTACTTTCGGACTCCGGTAGG
>Fam_468_31_1 Nr. of seq. 1 Alignment length(with gaps) = 31 Alignment score = 0.000000
GGGTGCCTGTCCCTGTACGGGAGAAGTTTGC
>Fam_469_31_1 Nr. of seq. 1 Alignment length(with gaps) = 31 Alignment score = 0.000000
CCCCCAGCGGGAAACCTCTCCCCACCTCCTC
>Fam_470_30_1 Nr. of seq. 1 Alignment length(with gaps) = 30 Alignment score = 0.000000
CGCGACATCTCCACGCGCGGGATATCCGGC
>Fam_471_30_1 Nr. of seq. 1 Alignment length(with gaps) = 30 Alignment score = 0.000000
GGGCTGGGCGTCTGTGCTCGCCGTGGCCGAT
>Fam_472_30_1 Nr. of seq. 1 Alignment length(with gaps) = 30 Alignment score = 0.000000
ACGGCCACCAACACACCGACCAATACACCC
>Fam_473_30_1 Nr. of seq. 1 Alignment length(with gaps) = 30 Alignment score = 0.000000

```

TTGCTATTTCTCCATTACCTGAATCCGGT  
>Fam\_474\_30\_1 Nr. of seq. 1 Alignment length(with gaps) = 30 Alignment score = 0.000000  
GGCGGTGATACGCCTGTTCCGCCAGACGAC  
>Fam\_475\_30\_1 Nr. of seq. 1 Alignment length(with gaps) = 30 Alignment score = 0.000000  
TTCACATCCGGCAGTTCACGCCGGGCACA  
>Fam\_476\_30\_1 Nr. of seq. 1 Alignment length(with gaps) = 30 Alignment score = 0.000000  
GTTTCGCCGCTCCGGTCCCCGGTTCGACG  
>Fam\_477\_30\_1 Nr. of seq. 1 Alignment length(with gaps) = 30 Alignment score = 0.000000  
CTGCTGGTTTGTFTTCTGCCGGCTTATTGT  
>Fam\_478\_30\_1 Nr. of seq. 1 Alignment length(with gaps) = 30 Alignment score = 0.000000  
GAATCCGAAGAATCTGAACCGAAACCGCCG  
>Fam\_479\_30\_1 Nr. of seq. 1 Alignment length(with gaps) = 30 Alignment score = 0.000000  
CCCGGCGGGGGCCCTCAGGTCGGGACAG  
>Fam\_480\_30\_1 Nr. of seq. 1 Alignment length(with gaps) = 30 Alignment score = 0.000000  
CCACACCGCCGGAGCCAGCACCACCAGGCC  
>Fam\_481\_30\_1 Nr. of seq. 1 Alignment length(with gaps) = 30 Alignment score = 0.000000  
GACCGTCCGGCGGGGTCGCGCTCGGGCT  
>Fam\_482\_28\_1 Nr. of seq. 1 Alignment length(with gaps) = 28 Alignment score = 0.000000  
ATTGCAAAGTGCAAATTGATCAATGCAA  
>Fam\_483\_28\_1 Nr. of seq. 1 Alignment length(with gaps) = 28 Alignment score = 0.000000  
TACATTTCAGAAGAAAATGCTGCGCCGT  
>Fam\_484\_28\_1 Nr. of seq. 1 Alignment length(with gaps) = 28 Alignment score = 0.000000  
TCACTTACTTGAGTAAGCTCATCGGGAT  
>Fam\_485\_27\_1 Nr. of seq. 1 Alignment length(with gaps) = 27 Alignment score = 0.000000  
GTTACCTGCACCACCTGCTATTGTATC  
>Fam\_486\_27\_1 Nr. of seq. 1 Alignment length(with gaps) = 27 Alignment score = 0.000000  
CCAAGAAGGCGGCAAGCAAGACCGCCN  
>Fam\_487\_27\_1 Nr. of seq. 1 Alignment length(with gaps) = 27 Alignment score = 0.000000  
GGCGTCAACCGACGGCGTAGGGGTGGTC  
>Fam\_488\_27\_1 Nr. of seq. 1 Alignment length(with gaps) = 27 Alignment score = 0.000000  
CTGCATTTCTGCATTAGCATCTCCTT  
>Fam\_489\_27\_1 Nr. of seq. 1 Alignment length(with gaps) = 27 Alignment score = 0.000000  
GATGAACTTGAACCACCTGTACTIONGAT  
>Fam\_490\_27\_1 Nr. of seq. 1 Alignment length(with gaps) = 27 Alignment score = 0.000000  
CCGGTGGTGCCGCTGGTGGGTTTCCC  
>Fam\_491\_27\_1 Nr. of seq. 1 Alignment length(with gaps) = 27 Alignment score = 0.000000  
GATACTAAAGAAGTGAAGGAAGCTAAA  
>Fam\_492\_27\_1 Nr. of seq. 1 Alignment length(with gaps) = 27 Alignment score = 0.000000

ACGCGGAGCGTCCAGCACTGCATTCCC

>Fam\_493\_27\_1 Nr. of seq. 1 Alignment length(with gaps) = 27 Alignment score = 0.000000  
TGAGGCGTCCC GCCTCAGAAGACAGCT

>Fam\_494\_27\_1 Nr. of seq. 1 Alignment length(with gaps) = 27 Alignment score = 0.000000  
CGCCATAGCCC GACGCGCCGGGAGCGG

>Fam\_495\_26\_1 Nr. of seq. 1 Alignment length(with gaps) = 26 Alignment score = 0.000000  
CTGGACGCGGCACGCGTCGGTTCGGT

>Fam\_496\_25\_1 Nr. of seq. 1 Alignment length(with gaps) = 25 Alignment score = 0.000000  
CCTCCGCCAGGACTGGAAGCACGCG

>Fam\_497\_25\_1 Nr. of seq. 1 Alignment length(with gaps) = 25 Alignment score = 0.000000  
GGCACGCGCTAATGGTGGTTCGTGCA

>Fam\_498\_24\_1 Nr. of seq. 1 Alignment length(with gaps) = 24 Alignment score = 0.000000  
CCTGGAACACCAGATCCAGAAAA

>Fam\_499\_24\_1 Nr. of seq. 1 Alignment length(with gaps) = 24 Alignment score = 0.000000  
CGGTTCGCCGAAGTCGCGCTGGGGN

>Fam\_500\_24\_1 Nr. of seq. 1 Alignment length(with gaps) = 24 Alignment score = 0.000000  
ACCGGGCTGGTTCGTTACCGTCGGC

>Fam\_501\_24\_1 Nr. of seq. 1 Alignment length(with gaps) = 24 Alignment score = 0.000000  
GCACGCGCACCGCTACGCCAACCG

>Fam\_502\_24\_1 Nr. of seq. 1 Alignment length(with gaps) = 24 Alignment score = 0.000000  
CCAACTACAGGTGGAACACAACA

>Fam\_503\_24\_1 Nr. of seq. 1 Alignment length(with gaps) = 24 Alignment score = 0.000000  
TCTGGTTTTTCTTCTGGGTCTACC

>Fam\_504\_24\_1 Nr. of seq. 1 Alignment length(with gaps) = 24 Alignment score = 0.000000  
GGCAGGAAGGNCATCAAATTGGCT

>Fam\_505\_24\_1 Nr. of seq. 1 Alignment length(with gaps) = 24 Alignment score = 0.000000  
CAAACCTTGAGGAAGAGCAACGAAT

>Fam\_506\_24\_1 Nr. of seq. 1 Alignment length(with gaps) = 24 Alignment score = 0.000000  
TGAATCTCTTCTATCTCCACGACC

>Fam\_507\_24\_1 Nr. of seq. 1 Alignment length(with gaps) = 24 Alignment score = 0.000000  
CTGGTGTTCGCCGACGTGCCACCA

>Fam\_508\_24\_1 Nr. of seq. 1 Alignment length(with gaps) = 24 Alignment score = 0.000000  
TGGTCCATCCCAGCCATGTTGCCG

>Fam\_509\_24\_1 Nr. of seq. 1 Alignment length(with gaps) = 24 Alignment score = 0.000000  
CGCAGCAAGGTGCGGGAGCTGGCT

>Fam\_510\_24\_1 Nr. of seq. 1 Alignment length(with gaps) = 24 Alignment score = 0.000000  
GGCTTCGCCACCACCGGTTCCGGCG

>Fam\_511\_24\_1 Nr. of seq. 1 Alignment length(with gaps) = 24 Alignment score = 0.000000

```

CCAGGCTTGTTGTTGTCTTCTTTG
>Fam_512_24_1 Nr. of seq. 1 Alignment length(with gaps) = 24 Alignment score = 0.000000
TTAACGTCTGGCTTAGCTTCTGGC
>Fam_513_24_1 Nr. of seq. 1 Alignment length(with gaps) = 24 Alignment score = 0.000000
CCCGCACGCGCACGTCCCCACCGC
>Fam_514_24_1 Nr. of seq. 1 Alignment length(with gaps) = 24 Alignment score = 0.000000
GCGTACGGCGGGNCCCGTTCCGAC
>Fam_515_24_1 Nr. of seq. 1 Alignment length(with gaps) = 24 Alignment score = 0.000000
TCCGGTGCCGGTCCGGTGCTACT
>Fam_516_24_1 Nr. of seq. 1 Alignment length(with gaps) = 24 Alignment score = 0.000000
CGCCCGGTCCGTTCATCCGGCGTCA
>Fam_517_23_1 Nr. of seq. 1 Alignment length(with gaps) = 23 Alignment score = 0.000000
GGGGTTGCGGAGAGCGGCAAGGC
>Fam_518_23_1 Nr. of seq. 1 Alignment length(with gaps) = 23 Alignment score = 0.000000
ATCCGGACACCCATTCCACNGGC
>Fam_519_23_1 Nr. of seq. 1 Alignment length(with gaps) = 23 Alignment score = 0.000000
GGTGGCAGCCGTCGACCCGCACG
>Fam_520_23_1 Nr. of seq. 1 Alignment length(with gaps) = 23 Alignment score = 0.000000
AGGGGTGTCGGCTCACGCGGTA
>Fam_521_23_1 Nr. of seq. 1 Alignment length(with gaps) = 23 Alignment score = 0.000000
GCGGCTCCTCGCCAGGCGTCCGT
>Fam_522_22_1 Nr. of seq. 1 Alignment length(with gaps) = 22 Alignment score = 0.000000
TTACGGTGCTGCGTAGCCAAAG
>Fam_523_22_1 Nr. of seq. 1 Alignment length(with gaps) = 22 Alignment score = 0.000000
ACAAAGTAAAACCACAAAGTTC
>Fam_524_22_1 Nr. of seq. 1 Alignment length(with gaps) = 22 Alignment score = 0.000000
TTCGGGGCTGTTGATATTGCAT
>Fam_525_22_1 Nr. of seq. 1 Alignment length(with gaps) = 22 Alignment score = 0.000000
GAACCATCAGATTTTGAGCGAA
>Fam_526_22_1 Nr. of seq. 1 Alignment length(with gaps) = 22 Alignment score = 0.000000
TCAACTATCGTGCCACGCCCTT
>Fam_527_22_1 Nr. of seq. 1 Alignment length(with gaps) = 22 Alignment score = 0.000000
CGACGAACGAGCAGCGGACCAC
>Fam_528_21_1 Nr. of seq. 1 Alignment length(with gaps) = 21 Alignment score = 0.000000
TCAGAAGCAGCAGCAGCAGCT
>Fam_529_21_1 Nr. of seq. 1 Alignment length(with gaps) = 21 Alignment score = 0.000000
CAATCACGCGAGTTGCCTCCN
>Fam_530_21_1 Nr. of seq. 1 Alignment length(with gaps) = 21 Alignment score = 0.000000

```



TTCAAATCTTTTATCNACNTG  
 >Fam\_531\_21\_1 Nr. of seq. 1 Alignment length(with gaps) = 21 Alignment score = 0.000000  
 GCCAACCAACCGTGTCGCCTT  
 >Fam\_532\_21\_1 Nr. of seq. 1 Alignment length(with gaps) = 21 Alignment score = 0.000000  
 GTGTCAGAGTCNGCATTNAAA  
 >Fam\_533\_21\_1 Nr. of seq. 1 Alignment length(with gaps) = 21 Alignment score = 0.000000  
 TATCTGCTCATTATAACCAGT  
 >Fam\_534\_21\_1 Nr. of seq. 1 Alignment length(with gaps) = 21 Alignment score = 0.000000  
 AGCTCGCCGACGGCACC GGCG  
 >Fam\_535\_21\_1 Nr. of seq. 1 Alignment length(with gaps) = 21 Alignment score = 0.000000  
 CCTCCTCGGCGGCGCTCTCGC  
 >Fam\_536\_21\_1 Nr. of seq. 1 Alignment length(with gaps) = 21 Alignment score = 0.000000  
 CTGTTCTTCCCACCGCCGAGC  
 >Fam\_537\_21\_1 Nr. of seq. 1 Alignment length(with gaps) = 21 Alignment score = 0.000000  
 TCGGGGCGGGTTGGGTACCGG  
 >Fam\_538\_21\_1 Nr. of seq. 1 Alignment length(with gaps) = 21 Alignment score = 0.000000  
 TACACAATATATAATAGCAAT  
 >Fam\_539\_21\_1 Nr. of seq. 1 Alignment length(with gaps) = 21 Alignment score = 0.000000  
 CCTGACGATGGCGCAATACT  
 >Fam\_540\_21\_1 Nr. of seq. 1 Alignment length(with gaps) = 21 Alignment score = 0.000000  
 TTGGTGAAC TTTCTTGCTCTT  
 >Fam\_541\_21\_1 Nr. of seq. 1 Alignment length(with gaps) = 21 Alignment score = 0.000000  
 AAATCTTTCTGTTCTTTAACC  
 >Fam\_542\_21\_1 Nr. of seq. 1 Alignment length(with gaps) = 21 Alignment score = 0.000000  
 TCATAATTAACCC TCAAATCA  
 >Fam\_543\_21\_1 Nr. of seq. 1 Alignment length(with gaps) = 21 Alignment score = 0.000000  
 GCCGGCTTCATGGC ATCNGCN  
 >Fam\_544\_21\_1 Nr. of seq. 1 Alignment length(with gaps) = 21 Alignment score = 0.000000  
 TCTATGGAAAGTCGTTTAGAC  
 >Fam\_545\_21\_1 Nr. of seq. 1 Alignment length(with gaps) = 21 Alignment score = 0.000000  
 GGCGGCATGGGAGGCATGGGC  
 >Fam\_546\_21\_1 Nr. of seq. 1 Alignment length(with gaps) = 21 Alignment score = 0.000000  
 GGCAAGGGCAGCCAGGACAAC  
 >Fam\_547\_21\_1 Nr. of seq. 1 Alignment length(with gaps) = 21 Alignment score = 0.000000  
 TCAATTCTTTTATTTGTTTCA  
 >Fam\_548\_19\_1 Nr. of seq. 1 Alignment length(with gaps) = 19 Alignment score = 0.000000  
 TAGATATTTAATTAAGTGG  
 >Fam\_549\_19\_1 Nr. of seq. 1 Alignment length(with gaps) = 19 Alignment score = 0.000000

TATATAAAATTTANTAATT

>Fam\_550\_18\_1 Nr. of seq. 1 Alignment length(with gaps) = 19 Alignment score = 0.000000  
AACTGGTTTAAATCGTGA  
>Fam\_551\_18\_1 Nr. of seq. 1 Alignment length(with gaps) = 18 Alignment score = 0.000000  
GCGCGGTTGTGGACGACG  
>Fam\_552\_18\_1 Nr. of seq. 1 Alignment length(with gaps) = 18 Alignment score = 0.000000  
CCTGTTACTCCAGTTGGA  
>Fam\_553\_18\_1 Nr. of seq. 1 Alignment length(with gaps) = 18 Alignment score = 0.000000  
ACGGGGAACACCGGACCC  
>Fam\_554\_18\_1 Nr. of seq. 1 Alignment length(with gaps) = 18 Alignment score = 0.000000  
CCTGATACAGGAGAAAAA  
>Fam\_555\_18\_1 Nr. of seq. 1 Alignment length(with gaps) = 18 Alignment score = 0.000000  
GTGATGCCTGTAGGACCA  
>Fam\_556\_18\_1 Nr. of seq. 1 Alignment length(with gaps) = 18 Alignment score = 0.000000  
CGTCTGGTTGTTTGTCTC  
>Fam\_557\_18\_1 Nr. of seq. 1 Alignment length(with gaps) = 18 Alignment score = 0.000000  
CTGGACAAGCAAGACAAT  
>Fam\_558\_18\_1 Nr. of seq. 1 Alignment length(with gaps) = 18 Alignment score = 0.000000  
GACGGCAAGCCNGGCGCN  
>Fam\_559\_18\_1 Nr. of seq. 1 Alignment length(with gaps) = 18 Alignment score = 0.000000  
CCCAGCCGGTGNTCGAG  
>Fam\_560\_18\_1 Nr. of seq. 1 Alignment length(with gaps) = 18 Alignment score = 0.000000  
GGCGGGTTTAGCACCCAC  
>Fam\_561\_18\_1 Nr. of seq. 1 Alignment length(with gaps) = 18 Alignment score = 0.000000  
GTGCGGGTTGGTGTGCGGC  
>Fam\_562\_18\_1 Nr. of seq. 1 Alignment length(with gaps) = 18 Alignment score = 0.000000  
TGACCCTGGTTTTTCTGT  
>Fam\_563\_18\_1 Nr. of seq. 1 Alignment length(with gaps) = 18 Alignment score = 0.000000  
GTGATCGGGTTCCCGGC  
>Fam\_564\_18\_1 Nr. of seq. 1 Alignment length(with gaps) = 18 Alignment score = 0.000000  
CGCCTGGCCAGTACGGCC  
>Fam\_565\_18\_1 Nr. of seq. 1 Alignment length(with gaps) = 18 Alignment score = 0.000000  
TGCTCGGGGTAACCGCGT  
>Fam\_566\_18\_1 Nr. of seq. 1 Alignment length(with gaps) = 18 Alignment score = 0.000000  
AAGCTGCCCAAGAACTTA  
>Fam\_567\_18\_1 Nr. of seq. 1 Alignment length(with gaps) = 18 Alignment score = 0.000000  
GAACCAGGTAAACCAGCG  
>Fam\_568\_18\_1 Nr. of seq. 1 Alignment length(with gaps) = 18 Alignment score = 0.000000

```
CCGTCCCCGGGCGCCGTAN
>Fam_569_18_1 Nr. of seq. 1 Alignment length(with gaps) = 18 Alignment score = 0.000000
GCCGCGGCGGGCTCCGGG
>Fam_570_18_1 Nr. of seq. 1 Alignment length(with gaps) = 18 Alignment score = 0.000000
TACGGCCAGCAGCCCCCN
>Fam_571_18_1 Nr. of seq. 1 Alignment length(with gaps) = 18 Alignment score = 0.000000
GGGTGGCCGGGCGGCCGT
>Fam_572_18_1 Nr. of seq. 1 Alignment length(with gaps) = 18 Alignment score = 0.000000
GAAGCGGCACTGGCTTCC
>Fam_573_18_1 Nr. of seq. 1 Alignment length(with gaps) = 18 Alignment score = 0.000000
AGGAGCCTTTGGAGCCTC
>Fam_574_18_1 Nr. of seq. 1 Alignment length(with gaps) = 18 Alignment score = 0.000000
TTCAAACGGCTTGCAGCG
>Fam_575_18_1 Nr. of seq. 1 Alignment length(with gaps) = 18 Alignment score = 0.000000
GTCGGCTCTGGCGTTACC
>Fam_576_18_1 Nr. of seq. 1 Alignment length(with gaps) = 18 Alignment score = 0.000000
ATCGGTAGCCCTGTGCAA
>Fam_577_18_1 Nr. of seq. 1 Alignment length(with gaps) = 18 Alignment score = 0.000000
TTTCAAGCTGAATGTGTG
>Fam_578_18_1 Nr. of seq. 1 Alignment length(with gaps) = 18 Alignment score = 0.000000
ACGGCACCGCCGGAAACA
>Fam_579_17_1 Nr. of seq. 1 Alignment length(with gaps) = 17 Alignment score = 0.000000
CAGGAGCAACAGGTCNA
>Fam_580_17_1 Nr. of seq. 1 Alignment length(with gaps) = 17 Alignment score = 0.000000
GGGCGGAGCGGTGCGAG
>Fam_581_17_1 Nr. of seq. 1 Alignment length(with gaps) = 17 Alignment score = 0.000000
TAGGATGTAAAAGTAAA
>Fam_582_17_1 Nr. of seq. 1 Alignment length(with gaps) = 17 Alignment score = 0.000000
TAAATATAAATAATGTA
>Fam_583_17_1 Nr. of seq. 1 Alignment length(with gaps) = 17 Alignment score = 0.000000
CAGGCCAGAAAACACCA
>Fam_584_17_1 Nr. of seq. 1 Alignment length(with gaps) = 17 Alignment score = 0.000000
TTACTGATATGGGCTAA
>Fam_585_16_1 Nr. of seq. 1 Alignment length(with gaps) = 16 Alignment score = 0.000000
GCGAATGGGCGAATGA
>Fam_586_16_1 Nr. of seq. 1 Alignment length(with gaps) = 16 Alignment score = 0.000000
CCCGAGAGCCCAGAGAG
>Fam_587_16_1 Nr. of seq. 1 Alignment length(with gaps) = 16 Alignment score = 0.000000
```

TATATTGGTATATTGG  
>Fam\_588\_16\_1 Nr. of seq. 1 Alignment length(with gaps) = 16 Alignment score = 0.000000  
AAAGATATTTGTAGAA  
>Fam\_589\_16\_1 Nr. of seq. 1 Alignment length(with gaps) = 16 Alignment score = 0.000000  
GCCGGTGTGNTAGTN  
>Fam\_590\_16\_1 Nr. of seq. 1 Alignment length(with gaps) = 16 Alignment score = 0.000000  
ATGTGATGATGTGATG  
>Fam\_591\_15\_1 Nr. of seq. 1 Alignment length(with gaps) = 15 Alignment score = 0.000000  
GCCAGCGCAGTCCCC  
>Fam\_592\_15\_1 Nr. of seq. 1 Alignment length(with gaps) = 15 Alignment score = 0.000000  
CTGCCGGATTCTGCG  
>Fam\_593\_15\_1 Nr. of seq. 1 Alignment length(with gaps) = 15 Alignment score = 0.000000  
ATGCCACTGCCCGGG  
>Fam\_594\_15\_1 Nr. of seq. 1 Alignment length(with gaps) = 15 Alignment score = 0.000000  
GGCATCTGGCCGCTG  
>Fam\_595\_15\_1 Nr. of seq. 1 Alignment length(with gaps) = 15 Alignment score = 0.000000  
CGTTTCGACCGGAGC  
>Fam\_596\_15\_1 Nr. of seq. 1 Alignment length(with gaps) = 15 Alignment score = 0.000000  
CGAGCCGGTCCCAGA  
>Fam\_597\_15\_1 Nr. of seq. 1 Alignment length(with gaps) = 15 Alignment score = 0.000000  
CCGTTCGTCACCGTTC  
>Fam\_598\_15\_1 Nr. of seq. 1 Alignment length(with gaps) = 15 Alignment score = 0.000000  
GGTTGATCGACACAC  
>Fam\_599\_15\_1 Nr. of seq. 1 Alignment length(with gaps) = 15 Alignment score = 0.000000  
ACCTGCGCGGNGCGG  
>Fam\_600\_15\_1 Nr. of seq. 1 Alignment length(with gaps) = 15 Alignment score = 0.000000  
GCCCGATGCANGGTG  
>Fam\_601\_15\_1 Nr. of seq. 1 Alignment length(with gaps) = 15 Alignment score = 0.000000  
CTTAAATTTGCAAAAN  
>Fam\_602\_15\_1 Nr. of seq. 1 Alignment length(with gaps) = 15 Alignment score = 0.000000  
CCCGACATTGCCCAA  
>Fam\_603\_15\_1 Nr. of seq. 1 Alignment length(with gaps) = 15 Alignment score = 0.000000  
CTGAATCGGACGGGA  
>Fam\_604\_14\_1 Nr. of seq. 1 Alignment length(with gaps) = 14 Alignment score = 0.000000  
CGCAGGCTGCAGAA  
>Fam\_605\_14\_1 Nr. of seq. 1 Alignment length(with gaps) = 14 Alignment score = 0.000000  
TATAATCTAATAAA  
>Fam\_606\_13\_1 Nr. of seq. 1 Alignment length(with gaps) = 13 Alignment score = 0.000000

CGTGCGCACCCGC

>Fam\_607\_12\_1 Nr. of seq. 1 Alignment length(with gaps) = 12 Alignment score = 0.000000  
ATTGAAAAGGC

>Fam\_608\_12\_1 Nr. of seq. 1 Alignment length(with gaps) = 12 Alignment score = 0.000000  
CCTGTTTCACAA

>Fam\_609\_12\_1 Nr. of seq. 1 Alignment length(with gaps) = 12 Alignment score = 0.000000  
GAAGCGCCGCAA

>Fam\_610\_12\_1 Nr. of seq. 1 Alignment length(with gaps) = 12 Alignment score = 0.000000  
ATGGCGGCGGTA

>Fam\_611\_12\_1 Nr. of seq. 1 Alignment length(with gaps) = 12 Alignment score = 0.000000  
AGCTTGGTTGGA

>Fam\_612\_12\_1 Nr. of seq. 1 Alignment length(with gaps) = 12 Alignment score = 0.000000  
GCCGCTGAAGTT

>Fam\_613\_12\_1 Nr. of seq. 1 Alignment length(with gaps) = 12 Alignment score = 0.000000  
TCCTCTTTAGCC

>Fam\_614\_12\_1 Nr. of seq. 1 Alignment length(with gaps) = 12 Alignment score = 0.000000  
ATAATAACAATA

>Fam\_615\_12\_1 Nr. of seq. 1 Alignment length(with gaps) = 12 Alignment score = 0.000000  
ATTAATGAAGAT

>Fam\_616\_12\_1 Nr. of seq. 1 Alignment length(with gaps) = 12 Alignment score = 0.000000  
TAATGCTAATGC

>Fam\_617\_11\_1 Nr. of seq. 1 Alignment length(with gaps) = 11 Alignment score = 0.000000  
TCCCGGGCCGC

>Fam\_618\_11\_1 Nr. of seq. 1 Alignment length(with gaps) = 11 Alignment score = 0.000000  
CGATTGCCCGG

>Fam\_619\_10\_1 Nr. of seq. 1 Alignment length(with gaps) = 10 Alignment score = 0.000000  
GCTGATATTC

>Fam\_620\_10\_1 Nr. of seq. 1 Alignment length(with gaps) = 10 Alignment score = 0.000000  
CAACTATCAC
